# Supplementary material for: Prevalence of depression in patients with type 2 diabetes mellitus in Spain (the DIADEMA Study) : results from the MADIABETES cohort
Source: PubMed Central journal article supplement — BMJ Open. 2018 Sep 24;8(9):e020768. doi: 10.1136/bmjopen-2017-020768 (PMC6157517; doi:10.1136/bmjopen-2017-020768), 2018-09-24
Supplement: bmjopen-2017-020768.draft_revisions.pdf [file bmjopen-2017-020768.draft_revisions.pdf]

# BMJ Open

BMJ Open is committed to open peer review. As part of this commitment we make the peer review history of every article we publish publicly available.

When an article is published we post the peer reviewers' comments and the authors' responses online. We also post the versions of the paper that were used during peer review. These are the versions that the peer review comments apply to.

The versions of the paper that follow are the versions that were submitted during the peer review process. They are not the versions of record or the final published versions. They should not be cited or distributed as the published version of this manuscript.

BMJ Open is an open access journal and the full, final, typeset and author-corrected version of record of the manuscript is available on our site with no access controls, subscription charges or pay-per-view fees (<http://bmjopen.bmj.com>).

If you have any questions on BMJ Open's open peer review process please email [info.bmjopen@bmj.com](mailto:info.bmjopen@bmj.com)

# BMJ Open

## The DIADEMA Study- Prevalence of depression in patients with Type 2 Diabetes Mellitus: Results from the MADiabetes Cohort

|                                 |                                                                                                                                                                                                                                                                                                                                                                                                                                                                                                                                                                                                                                                                                                                                                                                                                                                                                                                                                                                                                          |
|---------------------------------|--------------------------------------------------------------------------------------------------------------------------------------------------------------------------------------------------------------------------------------------------------------------------------------------------------------------------------------------------------------------------------------------------------------------------------------------------------------------------------------------------------------------------------------------------------------------------------------------------------------------------------------------------------------------------------------------------------------------------------------------------------------------------------------------------------------------------------------------------------------------------------------------------------------------------------------------------------------------------------------------------------------------------|
| Journal:                        | <i>BMJ Open</i>                                                                                                                                                                                                                                                                                                                                                                                                                                                                                                                                                                                                                                                                                                                                                                                                                                                                                                                                                                                                          |
| Manuscript ID                   | bmjopen-2017-020768                                                                                                                                                                                                                                                                                                                                                                                                                                                                                                                                                                                                                                                                                                                                                                                                                                                                                                                                                                                                      |
| Article Type:                   | Research                                                                                                                                                                                                                                                                                                                                                                                                                                                                                                                                                                                                                                                                                                                                                                                                                                                                                                                                                                                                                 |
| Date Submitted by the Author:   | 24-Nov-2017                                                                                                                                                                                                                                                                                                                                                                                                                                                                                                                                                                                                                                                                                                                                                                                                                                                                                                                                                                                                              |
| Complete List of Authors:       | <p>SALINERO-FORT, MIGUEL; Servicio Madrileño de Salud, Gerencia de Atención Primaria</p> <p>GÓMEZ-CAMPELO, PALOMA; Fundación Investigación Biomédica Hospital Universitario La Paz, IdiPAZ</p> <p>San Andrés-Rebollo, Javier; Servicio Madrileño de Salud</p> <p>Cárdenas-Valladolid, Juan; Comunidad de Madrid Servicio Madrileño de Salud</p> <p>ABANADES-HERRANZ, JUAN; Servicio Madrileño de Salud, Gerencia Adjunta Planificación y Calidad de Atención Primaria</p> <p>Carrillo de Santa Pau, Enrique; Centro Nacional de Investigaciones Oncológicas</p> <p>Chico-Moraleja, Rosa; Hospital Central de la Defensa Gomez Ulla</p> <p>de Miguel-Yanes, Jose; Hospital General Universitario Gregorio Marañón, Internal Medicine Department</p> <p>Jimenez-Garcia, Rodrigo; Univ Rey Juan Carlos,</p> <p>Lopez-de-Andres, Ana ; Universidad Rey Juan Carlos, Preventive Medicine and Public Health Teaching and Research Unit.</p> <p>DE BURGOS-LUNAR, CARMEN; Hospital Universitario La Paz, Medicina Preventiva</p> |
| <b>Primary Subject Heading</b>: | Diabetes and endocrinology                                                                                                                                                                                                                                                                                                                                                                                                                                                                                                                                                                                                                                                                                                                                                                                                                                                                                                                                                                                               |
| Secondary Subject Heading:      | Mental health, Epidemiology                                                                                                                                                                                                                                                                                                                                                                                                                                                                                                                                                                                                                                                                                                                                                                                                                                                                                                                                                                                              |
| Keywords:                       | Depression, Diabetes Mellitus, Type 2, Self-Care, Cohort Studies                                                                                                                                                                                                                                                                                                                                                                                                                                                                                                                                                                                                                                                                                                                                                                                                                                                                                                                                                         |
|                                 |                                                                                                                                                                                                                                                                                                                                                                                                                                                                                                                                                                                                                                                                                                                                                                                                                                                                                                                                                                                                                          |

SCHOLARONE™  
Manuscripts

1  
2  
3 **The DIADEMA Study- Prevalence of depression in patients with Type 2 Diabetes Mellitus:**  
4  
5 **Results from the MADiabetes Cohort.**  
6

7  
8 Salinero-Fort, M.A.<sup>1,§</sup>; Gómez-Campelo, P.<sup>2,§,\*</sup>, San Andrés-Rebollo, F.J.<sup>3</sup>; Cárdenas-Valladolid,  
9 J.<sup>4</sup>; Abánades-Herranz, J.C.<sup>5</sup>; Carrillo de Santa Pau, E.<sup>6</sup>; Chico-Moraleja, R.M.<sup>7</sup>; de Miguel-Yanes,  
10 J.M.<sup>8</sup>; Jiménez-García, R.<sup>9</sup>; López-de Andrés A.<sup>9</sup>; and De Burgos-Lunar, C.<sup>10</sup>. On behalf of  
11  
12  
13  
14  
15 MADIABETES Research Group.  
16

- 17  
18  
19  
20  
21  
22  
23  
24  
25  
26  
27  
28  
29  
30  
31  
32  
33  
34  
35  
36  
37  
38  
39  
40  
41  
42  
43  
44  
45  
46  
47  
48  
49  
50  
51  
52  
53  
54  
55  
56  
57  
58  
59  
60
1. Subdirección General de Investigación Sanitaria. Consejería de Sanidad, Madrid, Spain.
  2. Hospital La Paz Institute for Health Research (IdiPAZ), La Paz University Hospital, Madrid, Spain.
  3. Centro de Salud Las Calesas, Servicio Madrileño de Salud, Madrid, Spain.
  4. Gerencia Adjunta de Planificación y Calidad, Gerencia de Atención Primaria, Servicio Madrileño de Salud, Madrid, Spain.
  5. Centro de Salud Monóvar, Servicio Madrileño de Salud, Madrid, Spain.
  6. Centro Nacional de Investigaciones Oncológicas, Madrid, Spain.
  7. Hospital Central de la Defensa, Madrid, Spain.
  8. Hospital Gregorio Marañón, Madrid, Spain.
  9. Facultad de Ciencias de la Salud, Universidad Rey Juan Carlos, Alcorcón, Madrid, Spain
  10. Centro de Salud Isla de Arosa, Servicio Madrileño de Salud, Madrid, Spain

§ Equal contribution

\* **Corresponding author:**

P. Gómez-Campelo

Hospital La Paz Institute for Health Research (IdiPAZ), La Paz University Hospital, Madrid,  
Spain

[pgomez@salud.madrid.org](mailto:pgomez@salud.madrid.org)

Address: Pº de la Castellana, 261

1  
2  
3 28046 Madrid

4  
5 Phone: +34 91 207 14 44

6  
7 Fax: +34 91 727 75 24  
8  
9  
10  
11  
12  
13  
14  
15  
16  
17  
18  
19  
20  
21  
22  
23  
24  
25  
26  
27  
28  
29  
30  
31  
32  
33  
34  
35  
36  
37  
38  
39  
40  
41  
42  
43  
44  
45  
46  
47  
48  
49  
50  
51  
52  
53  
54  
55  
56  
57  
58  
59  
60

For peer review only

**Abstract**

Objective: To estimate the prevalence of depression in patients diagnosed with Type 2 Diabetes Mellitus, and to identify factors associated with the occurrence of depression. Additionally, we examine the one year incidence rate of depression among T2DM patients.

Methods: A prospective dynamic cohort study of patients with Type 2 Diabetes Mellitus from the Madrid Diabetes Study with two recruitments (n=3,443 patients and n=727). Data was collected since baseline visit and annually during the follow-up period.

Results: Depression was prevalent in 23.4% of patients, and was significantly associated with previous personal history of depression (OR, 8.039; 95%CI, 6.394 to 10.108), mental health status (OR, 1.935; 95%CI, 1.452-2.577), neuropathy (OR, 1.571; 95%CI, 1.146-2.154), treatment with insulin (OR, 1.568; 95%CI, 1.008-2.439), fair or poor self reported health status (OR, 1.473; 95%CI, 1.189-1.824), treatment with oral antidiabetic agents plus insulin (OR, 1.421; 95%CI, 1.075-1.878), female gender (OR, 1.398; 95%CI, 1.069-1.827), cardiovascular disease (OR, 1.273; 95%CI, 1.002-1.617), and blood cholesterol level (OR, 1.004; 95%CI, 1.001-1.008; p=0.016).

On the other hand, the variables inversely associated with depression were: status of workers employed (OR, 0.603; 95%CI, 0.409 to 0.890; p=0.011), foreign born (OR, 0.300; 95%CI, 0.124 to 0.729; p=0.008), moderate and vigorous physical activity (OR, 0.409; 95%CI, 0.241 to 0.694; p=0.001), systolic blood pressure (OR, 0.989; 95%CI, 0.978 to 0.999; p=0.029), and social support (network size) (OR, 0.978; 95%CI, 0.963 to 0.993; p=0.004).

Conclusions: Depression is very prevalent among patients with Type 2 Diabetes Mellitus and it was associated with several key diabetes-related outcomes. Our results suggest that previous mental status, self reported health status, gender and several complications related to diabetes express differences in depression of the patients. These findings should alert practitioner to the importance of detection of depression in patients with Diabetes Mellitus Type 2.

## Strengths and limitations of this study

### 1.1. Strengths and limitations

- Time between both telephone interviews for depression screening was too short (12 months), making it difficult to compare cumulative incidence rates with most studies.
- The prescription of antidepressants takes place in diseases other than depression (i.e., sleeping disorders, migraine, neuropathic pain, obsessive-compulsive disorders, anxiety/panic disorder), and the use of a combined variable for the diagnosis of depression includes the prescription of antidepressant medication and could have therefore overestimated its prevalence.
- In order to compare multivariate models from different studies, it is possible that we just performed an unnecessary adjustment of variables. But, fortunately, there was no significant evidence for over-adjustment (changes >20% between crude and adjusted SE, data not shown).
- The prospective design of the study was a strength, which ensured that measurement of risk factors preceded the development of depression; and the assessment of information on potentially confounding variables, which reduces the potential selection and confusion biases.
- Also, we used an assessment of depression based on MINI 5.0, completed with having been diagnosed with depression, treatment with antidepressant medications or any of these conditions. Therefore, self-reported diagnosis was avoided.

**Keywords:** Depression; Diabetes Mellitus, Type 2; Self-Care; Cohort Studies.

## 2. Introduction

Currently, an estimated 8%-9% of the worldwide adult population has Type 2 Diabetes Mellitus (T2DM), with a substantial increase of the prevalence over time (1). Among the Spanish population, the prevalence is even higher (13.8%) (2).

Previous studies have shown that among people with T2DM, the coexistence of mental disorders such as depression is considerably higher than in the overall population (3) (4), with an prevalence from 15% to 24% (5) and an incidence rate of depression during the first year after oral antidiabetic drugs initiation of 12.61 per 1000 person-years (6). The coexistence of diabetes and mental disorders has a strong impact on the patient, with an increased risk of cardiovascular disease and all-cause (7) and cardiovascular mortality (7), especially as a result of cardiovascular complications (8) of T2DM. Also, patients with diabetes and mental disorders show less compliance with treatment recommendations than T2DM patients without depression, and more frequently have cardiovascular risk factors such as smoking, obesity, sedentary lifestyle or poor glycemic control (9), which can consequently impact on their health-related quality of life (10).

To our knowledge, research on common mental disorders affecting patients with T2DM is scarce in Spain (11) (12) (13). Recently, Alonso-Morán et al. found, (14) in their cross-sectional study in patients with T2DM, that 9.8% of the patients were diagnosed with depression (5.2% for males and 15.1% for females), and in a study by Nicolau et al. (12), 27.2% had symptoms of depression. However, in these studies data collection has often been based on Health Surveys (11) (15) or self-reported scales (16) (12), with a heterogeneous variability of the data. Thus, mental disorders have not been assessed using as "gold standard" a clinical interview.

The aims of the present study are to estimate the prevalence of depression in patients diagnosed with T2DM, and to identify sociodemographic, clinical, and psychological factors associated with the occurrence of depression in this population. Additionally, we examine the one year incidence rate of depression among T2DM patients.

### 3. Material and Methods

#### 3.1. Design and participants

The Madrid Diabetes Study (MADiabetes Study), is a large prospective cohort study, focusing on the analysis of different clinical and psychosocial aspects of outpatients with T2DM living in the metropolitan area of Madrid, Spain. In 2007, a first recruitment process was performed, and 3,443 T2DM outpatients were enrolled in one of the 56 Primary Health Care Centers (PHCC) participating. Patients were selected by simple random sampling by participating general practitioners (n= 131), based on the list of patients with a diagnosis of T2DM in their Computerized Clinical Records (CCRs). A more complete description of this methodology can be found elsewhere (17).

Reasons not to continue till the study completion were leaving the participating practice, death or drop-out. Furthermore, the dynamic character of MADiabetes cohort, which means that new participants could enter over time, helped prevent vanishing of the study population sample. So, at the end of 2010, a second recruitment process was performed, with 41 PHCC including 727 new patients.

Inclusion criteria to participate in the study were: patients with a diagnosis of T2DM in the CCR (code T90 of International Classification of Primary Care [ICPC-2] (19), who were 30 years of age or older, who had visited their PHCC at least twice in the last year, and had agreed to take part in the study and provided written informed consent. Patients were excluded for the following reasons: diagnosis of gestational diabetes mellitus, institutionalized patients, subjects who could not understand Spanish, patients with severe chronic diseases or significant physical or psychic disabilities that might invalidate informed consent or interviews (according to clinical judgment), legal incompetence or legal guardianship, or participation in clinical trials.

For the purpose of evaluating the prevalence of depression (DIAbetes and DEpression in MAdrid-DIADEMA Study), we included those patients who participated in the interview



1  
2  
3 conducted between January 1<sup>st</sup> 2011 and 31<sup>th</sup> December 2011. Also, to estimate the annual  
4 incidence of depression, the data from the second interview was included. The original  
5 protocol of the study was published in advance (18). Therefore, for the main variable the  
6  
7  
8  
9  
10  
11  
12  
13  
14  
15  
16  
17  
18  
19  
20  
21  
22  
23  
24  
25  
26  
27  
28  
29  
30  
31  
32  
33  
34  
35  
36  
37  
38  
39  
40  
41  
42  
43  
44  
45  
46  
47  
48  
49  
50  
51  
52  
53  
54  
55  
56  
57  
58  
59  
60  
MADiabetes cohort included a total of 2,955 patients (see the flow diagram in Figure 1).

### 3.2. Source of data

To achieve the goal of the MADiabetes Study, data was collected since 2007 (baseline visit) and annually during the follow-up period (since 2008), and four data collection strategies were combined.

Firstly, data concerning disease episodes (coded in ICPC-2) (19), prescription of medication (coded in Anatomical Therapeutic Chemical classification system), laboratory results, anthropometric variables, and use of care facilities were registered using data from CCR. The CCR for Primary Health Care in Madrid's Health Service was administered by OMI-AP© software. The CCR registration is continuously updated in the Primary Health Care Center under routine clinical practice conditions, and once a year, data was transferred to our central database.

Secondly, the general practitioner of each participating patient completed information about morbidity and mortality, collected under routine clinical practice conditions; this information was recorded on electronic case report forms (hosted on the website [www.madiabetes.com](http://www.madiabetes.com)). All the team of general practitioners received training to standardize their knowledge about project objectives, data collection techniques and field work procedures.

Thirdly, from 2011 onward, all patients were invited each year to undergo an interview to collect sociodemographic data, lifestyles, determinants of health, and psychosocial characteristics. This data collection was conducted using a previously standardized protocol designed in advance, and was done through a telephone interview performed by a clinical psychologist trained in the evaluation procedure of the study. Lastly, the vital status of the

1  
2  
3 patients was ascertained from two mortality records: *Índice Nacional de Defunciones*  
4 ([https://www.msssi.gob.es/estadEstudios/estadisticas/estadisticas/estMinisterio/IND\\_TipoDif](https://www.msssi.gob.es/estadEstudios/estadisticas/estadisticas/estMinisterio/IND_TipoDif)  
5 usion.htm) and *Instituto Nacional de Estadística* (<http://www.ine.es>). This last record indicates  
6  
7 the underlying cause of death recorded on the death certificates, which is coded according to  
8  
9 the International Classification of Diseases, Tenth Revision (20).  
10  
11  
12  
13  
14

### 15 3.3. Variables

16  
17 The primary outcome variable was depression. The diagnosis of depression was considered as  
18  
19 a combined variable, as suggested by other authors (21), consisting of a diagnosis based on the  
20  
21 module of major depressive disorder of the International Neuro-psychiatric Interview (MINI  
22  
23 5.0.0) (22), and according to clinical judgment, use of antidepressant medication, and/or  
24  
25 physician-diagnosed depression. In order to exclude those episodes that were not currently  
26  
27 active at the moment of the evaluation, we included only those patients who had received a  
28  
29 diagnosis of depression in the preceding last 12 months, or had a prescription of  
30  
31 antidepressant medication within the previous four months.  
32  
33

34 The MINI is a short and efficient diagnostic interview to diagnose mental disorders, which was  
35  
36 used in its Spanish version (23).  
37

38 In addition, other *psychosocial variables* were evaluated:

- 39  
40 - A personal history of psychiatric disorder was registered if patient reported a positive  
41  
42 response to the question: "Has a clinician ever diagnosed you as having any psychiatric  
43  
44 disorder?. Alternatively, whenever patients had formerly received a diagnosis of a psychiatric  
45  
46 disorder before the last 12-month interval, as coded in the CCR.  
47  
48  
49 - A family history of psychiatric disorder was registered if the patient reported a positive  
50  
51 response to the question: "Has any family member (in first-degree relatives) ever been  
52  
53 diagnosed of a psychiatric disorder?"  
54  
55  
56  
57  
58  
59  
60

1  
2  
3 - Anxiety disorder was defined based on the module of generalized anxiety disorder of the  
4 MINI (23) and according to clinical judgment.

5  
6  
7 - Social support, such as network size, was measured by the question: "About how many close  
8 friends and close relatives do you have (people you feel at ease with and can talk to about  
9 what is on your mind)?", which corresponds to the first item of the Medical Outcomes Study-  
10 Social Support Survey (MOS-SSS) (24).  
11  
12

13  
14  
15 - Health-related quality of life was measured using the SF-12 questionnaire, a composite of 12  
16 items that assess eight dimensions of health: physical functioning, role-physical, general  
17 health, bodily pain, vitality, social functioning, role-emotional and mental health (25). The SF-  
18 12 measures various aspects of physical and mental health, from which physical and mental  
19 summary scores are computed using the scores of twelve questions, and ranges from 0 to 100,  
20 where a zero score indicates the lowest level of health and 100 indicates the highest level of  
21 health. Both Physical and Mental Health Composite Scales combine the 12 items in such a way  
22 that they compare to a national norm with a mean score of 50.0 and a standard deviation of  
23 10.0.  
24  
25

26  
27  
28 *Sociodemographic variables* included were: age (date of birth), gender, nationality, time of  
29 residence in Spain, marital status (single, unmarried partners, married, divorced, widowed),  
30 educational level (no studies, primary, high school, university), and employment status  
31 (employed, unemployed, retired, housewife and other).  
32  
33

34  
35  
36 *Medical variables* included the following:

- 37  
38  
39  
40  
41  
42  
43  
44  
45 - Comorbidity variables: hypertension, heart failure, myocardial infarction, stroke,  
46 peripheral artery disease, low limb amputations, erectile dysfunction, retinopathy,  
47 nephropathy, neuropathy and renal failure. Cardiovascular disease (CVD) was defined as  
48 one or more of the following: myocardial infarction, stroke or peripheral vascular disease.  
49  
50  
51  
52  
53 - Other clinical variables: diabetes duration and family history (in the first-degree relatives)  
54 of diabetes.  
55  
56  
57  
58  
59  
60

- 1  
2  
3 – Anthropometric variables: height, weight, body mass index (BMI), hip circumference, waist  
4 circumference, systolic blood pressure, and diastolic blood pressure.
- 5  
6  
7 – Laboratory results: albuminuria, creatinine, lipid profile, HbA1c and glucose.
- 8  
9  
10 – Personal health habits: smoking (never, former or current smoker), physical activity level  
11 (sedentary, moderate-intensity, vigorous-intensity, competition-level), and drinking (0.1  
12 through 4.9, or 5.0 or more g/d of alcohol).
- 13  
14  
15 – Treatment: statins,  $\beta$ -blockers, angiotensin-converting enzyme inhibitors, angiotensin  
16 receptor blockers, calcium channel blockers, diuretics, antiplatelets, antidiabetics,  
17 antidepressant drugs and anxiolytics that had been prescribed.  
18  
19  
20  
21  
22

### 23 24 3.4. Statistical analysis

25  
26 A descriptive analysis was conducted for each variable, as mean and standard deviation for  
27 quantitative variables, and as frequency distribution for qualitative variables. Normally  
28 distributed continuous variables were compared using the t test, non-normally distributed  
29 variables were compared using the Mann-Whitney test, and categorical variables were  
30 compared using the Chi-square test.  
31  
32

33  
34  
35  
36 Multivariate logistic regressions models were constructed to identify variables that were  
37 independently associated with depression (prevalent). We report adjusted odds ratios (ORs)  
38 with their respective 95% confidence intervals (95% CIs). Variables that were statistically  
39 significant in the bivariate analysis and those shown to be predictors in previous studies were  
40 included in the multivariate analysis. We analyzed the possibility of over-adjustment, defined  
41 when after adjusting on the covariate it altered the adjusted OR of 10%–20% with a  
42 concomitant change of the standard error (SE) higher than 20%.  
43  
44  
45  
46  
47  
48  
49

50  
51 The annual incidence rate of depression was calculated by the standard method as follows:  
52  
53 number of new cases of depression over a period (year 2011) / Population at risk of developing  
54 the disease at the beginning of the period.  
55  
56  
57  
58  
59

1  
2  
3 In all cases, the accepted level of significance was 0.05 or less, with a 95%CI. Statistical  
4 processing of the data was performed using the Statistical Package for the Social Sciences  
5 (SPSS for windows, version 21.0; IBM Corp, Armonk, New York, USA).  
6  
7  
8  
9

### 10 11 3.5. Ethical aspects

12 The study was approved by the Institutional Review Board of the Ramón y Cajal Hospital  
13 (Madrid) and conducted in accordance with the principles of the Declaration of Helsinki. All  
14 patients gave their written informed consent to participate in the study.  
15  
16  
17  
18  
19

## 20 21 4. Results

### 22 23 4.1. Characteristics of the study population and prevalence of depression

24 At the first recruitment (January 2007), 3,443 patients were included at the study. A total of  
25 3,217 were alive before the start of the survey (January 2013), and 2,228 agreed to the  
26 interview (participation rate: 69.3%), and of the second recruitment, 727 patients accept to  
27 participate (December 2010). Therefore, for the main objective of this study, the sample  
28 consisted of 2,955 people; 48.1% were women and the mean age was 70.2 years (SD 10.6).  
29

30 Depression was prevalent in 23.4% (n=691; 95%CI, 21.9 to 24.9) Table 1 shows the  
31 characteristics of the sample, stratified by depression and anxiety status.  
32

33 Compared with patients without depression, people with depression were more likely to be  
34 female (<0.001), older (p<0.004), widowed or divorced (p<0.001), had a lower educational  
35 level (p<0.001), were more frequently classified as housewife, unemployed or retired  
36 (p<0.001), and had a higher duration and intensity of diabetes treatment regimen (p=0.003).  
37

38 Also, patients with depression had lower BMIs (p<0.001), were lower consumers of alcohol  
39 (p<0.001) and, on the contrary, showed higher rates of never smoker (p<0.001), sedentary life  
40 (p<0.001), history of myocardial infarction (p=0.013), neuropathy (p<0.001), and renal failure  
41  
42  
43  
44  
45  
46  
47  
48  
49  
50  
51  
52  
53  
54  
55  
56  
57  
58  
59  
60

|  | TOTAL<br>(n=2,955) | Without depression<br>(n=2,264) | With depression<br>(n=691) | p value |
|--|--------------------|---------------------------------|----------------------------|---------|
|--|--------------------|---------------------------------|----------------------------|---------|

(p=0.005). 14.8% of the sample had anxiety (n= 438; 95%CI, 13.5 to 16.1), and coexistence of conditions, depression and anxiety, occurred in up to 8.2% (n=242) of the patients.

Also patients with depression had higher rates of previous episodes of depression (p<0.001) and anxiety (p<0.001), and fair or poor self-reported health status (p<0.001), as compared with patients without these disorders. In addition, patients with depression or anxiety, showed no significant differences when compared with psychically healthy subjects in the following aspects: family history of diabetes, level of HbA1c, triglycerides values, nephropathy, and retinopathy.

**Table 1. Characteristics of the MADiabetes Cohort (n=2,955), stratified depression status.**

|                                                    |                         |                       |                       |        |
|----------------------------------------------------|-------------------------|-----------------------|-----------------------|--------|
| <b>Sociodemographic variables</b>                  |                         |                       |                       |        |
| Gender (female); n (%; 95%CI)                      | 1.421 (48.1; 46.3-49.9) | 955 (42.2; 40.1-44.2) | 466 (67.4;63.9-70.9)  | <0.001 |
| Age (years); mean (SD)                             | 70.2 (10.6)             | 69.9 (10.7)           | 71.2 (10.3)           | <0.004 |
| Country of origin (foreign-born); n (%; 95%CI)     | 70 (2.4;1.8-2.9)        | 62 (2.8;2-3.4)        | 8 (1.2;0.3-1.9)       | 0.016  |
| Marital status; n (%; 95%CI)                       |                         |                       |                       |        |
| Single without partner                             | 4.6                     | 4.8                   | 3.9                   | <0.001 |
| Married o with partner                             | 70.4                    | 73                    | 61.6                  |        |
| Divorced                                           | 4.4                     | 4.2                   | 4.4                   |        |
| Widowed                                            | 20.8                    | 18                    | 30                    |        |
| Educational level; n (%)                           |                         |                       |                       |        |
| No completed                                       | 613 (20.9)              | 439 (19.6)            | 174 (25.4)            | <0.001 |
| Primary                                            | 1367 (46.7)             | 1030 (45.9)           | 337 (49.1)            |        |
| Secondary                                          | 576 (19.7)              | 463 (20.6)            | 113 (16.5)            |        |
| University                                         | 374 (12.8)              | 312 (13.9)            | 62 (9)                |        |
| Employment status; n (%)                           |                         |                       |                       |        |
| Employed                                           | 459 (15.7)              | 394 (17.6)            | 65 (9.4)              | <0.001 |
| Unemployed                                         | 105 (3.6)               | 75 (3.3)              | 30 (4.4)              |        |
| Retired                                            | 1953 (66.6)             | 1492 (66.5)           | 461 (67)              |        |
| Housewife                                          | 372 (12.7)              | 252 (11.2)            | 120 (17.4)            |        |
| Other                                              | 43 (1.5)                | 31 (1.4)              | 12 (1.7)              |        |
| <b>Variables related to diabetes</b>               |                         |                       |                       |        |
| Duration of diabetes (years); mean (SD)            | 15.4 (10.2)             | 15 (10.1)             | 16.4 (10.4)           | 0.003  |
| Family history of diabetes (Yes); n (%; 95%CI)     | 1813 (61.7; 59.9-63.5)  | 1373 (61; 58.9-63)    | 440 (54.1; 60.5-67.7) | 0.135  |
| Type of diabetes treatment; n (%)                  |                         |                       |                       |        |
| Only diet                                          | 400 (16.8)              | 309 (17)              | 91 (16)               | 0.003  |
| Oral antidiabetic agents                           | 1453 (60.9)             | 1134 (62.4)           | 319 (56.3)            |        |
| Insulin                                            | 149 (6.2)               | 110 (6.1)             | 39 (6.9)              |        |
| Oral antidiabetic agents + insulin                 | 383 (16.1)              | 265 (14.6)            | 118 (20.8)            |        |
| <b>Lifestyle and self-care</b>                     |                         |                       |                       |        |
| Smoking habit; n (%)                               |                         |                       |                       |        |
| Never smoker                                       | 1305 (45)               | 931 (41.6)            | 374 (56.3)            | <0.001 |
| Ex-smoker                                          | 1259 (43.4)             | 1034 (46.2)           | 225 (33.9)            |        |
| Smoker                                             | 336 (11.6)              | 271 (12.1)            | 65 (9.8)              |        |
| Current regular alcohol use; n (%; 95%CI)          | 883 (33.6; 31.9-35.44)  | 745 (36.6; 34.6-38.7) | 138 (23.3; 19.9-26.7) | <0.001 |
| Physical activity; n (%)                           |                         |                       |                       |        |
| Sedentary                                          | 333 (13.3)              | 211 (10.9)            | 122 (21.3)            | <0.001 |
| Low                                                | 1963 (78.2)             | 1540 (79.5)           | 423 (73.7)            |        |
| Moderate                                           | 209 (8.3)               | 180 (9.3)             | 29 (5.1)              |        |
| Vigorous activity                                  | 5 (0.2)                 | 5 (0.3)               | 0 (0)                 |        |
| <b>Clinical risk factors</b>                       |                         |                       |                       |        |
| BMI (Kg/m <sup>2</sup> ); mean (SD)                | 31.1 (5.6)              | 30.9 (5.5)            | 32 (5.9)              | <0.001 |
| Systolic blood pressure (mmHg); mean (SD)          | 131.5 (12.6)            | 131.9 (12.6)          | 129.9 (12.4)          | <0.001 |
| Diastolic blood pressure (mmHg); mean (SD)         | 73.9 (7.5)              | 74.1 (7.4)            | 73.2 (7.6)            | 0.005  |
| <b>Biochemical risk factors</b>                    |                         |                       |                       |        |
| HbA1c (%); mean (SD)                               | 7.1 (1.1)               | 7.1 (1.1)             | 7.2 (1.2)             | 0.349  |
| Triglycerides; mean (SD)                           | 142.4 (87.6)            | 141 (92.2)            | 146.8 (69.3)          | 0.122  |
| Cholesterol; mean (SD)                             | 175.7 (33.9)            | 174.2 (33.3)          | 180.6 (35.4)          | <0.001 |
| LDL-Cholesterol; mean (SD)                         | 99.2 (27.3)             | 98.4 (26.6)           | 101.7 (29.4)          | 0.024  |
| HDL-Cholesterol; mean (SD)                         | 49.5 (13.2)             | 48.9 (12.7)           | 51.3 (14.7)           | <0.001 |
| <b>Complications and comorbidities</b>             |                         |                       |                       |        |
| Acute myocardial infarction                        | 570 (13.7; 12.6-14.7)   | 429 (13; 11.8-14.1)   | 141 (16.2; 13.8-18.7) | 0.013  |
| Nephropathy                                        | 522 (12.5; 11.5-13.5)   | 401 (12.1; 11-13.3)   | 121 (13.9; 11.6-16.2) | 0.155  |
| Neuropathy                                         | 397 (9.5; 8.6-10.4)     | 271 (8.2; 7.3-9.1)    | 126 (14.5; 12.2-16.9) | <0.001 |
| Retinopathy                                        | 567 (13.6; 12.6-14.6)   | 434 (13.1; 12-14.3)   | 133 (15.3; 12.9-17.7) | 0.096  |
| Renal failure                                      | 536 (12.9; 11.8-13.9)   | 400 (12.1; 11-13.2)   | 136 (15.7; 13.2-18.1) | 0.005  |
| <b>Psychosocial variables</b>                      |                         |                       |                       |        |
| Family history of depression (Yes); n (%; 95%CI)   | 197 (6.7; 5.8-7.6)      | 135 (6; 5-7)          | 62 (9.1; 7-11.3)      | 0.004  |
| Personal history of depression (Yes); n (%; 95%CI) | 557 (18.9; 17.5-20.3)   | 216 (9.6; 8.3-10.7)   | 341 (49.6; 45.9-53.4) | <0.001 |
| Anxiety                                            | 438 (14.8;13.5-16.1)    | 196 (8.7;7.5-9.9)     | 242 (35;31.4-38.6)    | <0.001 |
| Family history of anxiety (Yes); n (%; 95%CI)      | 71 (2.4; 1.9-3)         | 47 (2.1; 1.5-2.7)     | 24 (3.5, 2.1-4.9)     | 0.033  |
| Personal history of anxiety (Yes); n (%; 95%CI)    | 344 (11.7; 10.5-12.8)   | 157 (7; 5.9-8)        | 187 (27.2; 23.9-30.5) | <0.001 |

|                                                          |                     |                       |                     |        |
|----------------------------------------------------------|---------------------|-----------------------|---------------------|--------|
| Self-reported Health status (Fair or poor); n (%; 95%CI) | 992 (34.3; 32.5-36) | 685 (30.8; 28.8-32.7) | 307 (46; 42.2-49.8) | <0.001 |
| Physical quality of life; mean (SD)                      | 40.1 (11.4)         | 41.4 (10.8)           | 36.4 (12.1)         | <0.001 |
| Mental quality of life; mean (SD)                        | 47.4 (10.9)         | 49.5 (9.3)            | 41.5 (12.7)         | <0.001 |
| Social support (network size); mean (SD)                 | 10.2 (8.3)          | 10.7 (8.5)            | 8.6 (6.5)           | <0.001 |
| Sleep (AIS); mean (SD)                                   | 2.6 (3.7)           | 2.1 (3.1)             | 4.4 (4.9)           | <0.001 |

#### 4.2. Factors associated with prevalent depression

Table 2 shows the variables associated with depression after fully adjustment for potential confounding factors. The variable more strongly associated with depression was previous personal history of depression (OR, 8.039; 95%CI, 6.394 to 10.108;  $p \leq 0.001$ ), followed by mental health score (SF-12) below mean (OR, 1.935; 95%CI, 1.452 to 2.577;  $P \leq 0.001$ ), neuropathy (OR, 1.571; 95%CI, 1.146 to 2.154;  $p = 0.005$ ), treatment with insulin (OR, 1.568; 95%CI, 1.008 to 2.439;  $p = 0.045$ ), fair or poor self reported health status (OR, 1.473; 95%CI, 1.189 to 1.824;  $p < 0.001$ ), treatment with oral antidiabetic agents plus insulin (OR, 1.421; 95%CI, 1.075 to 1.878;  $p = 0.014$ ), female gender (OR, 1.398; 95%CI, 1.069 to 1.827;  $p = 0.014$ ), cardiovascular disease (OR, 1.273; 95%CI, 1.002 to 1.617;  $p = 0.049$ ), and blood cholesterol level (OR, 1.004; 95%CI, 1.001 to 1.008;  $p = 0.016$ ).

On the other hand, the variables inversely associated with depression were: status of workers employed (OR, 0.603; 95%CI, 0.409 to 0.890;  $p = 0.011$ ), foreign born (OR, 0.300; 95%CI, 0.124 to 0.729;  $p = 0.008$ ), moderate and vigorous physical activity (OR, 0.409; 95%CI, 0.241 to 0.694;  $p = 0.001$ ), systolic blood pressure (OR, 0.989; 95%CI, 0.978 to 0.999;  $p = 0.029$ ), and social support (network size) (OR, 0.978; 95%CI, 0.963 to 0.993;  $p = 0.004$ ).

**Table 2. Factors associated with prevalence of Depression (Logistic Regression Analysis)**



|                                                      |                                     |       |             |        |
|------------------------------------------------------|-------------------------------------|-------|-------------|--------|
| <b>Gender</b>                                        |                                     |       |             |        |
|                                                      | Male                                | 1     |             |        |
|                                                      | Female                              | 1.398 | 1.069-1.827 | 0.014  |
| <b>Age</b>                                           |                                     |       |             |        |
|                                                      | <65 years                           | 1     |             |        |
|                                                      | ≥65 years                           | 0.821 | 0.606-1.114 | 0.205  |
| <b>Duration of DMT2 (y)[per unit of increment]</b>   |                                     |       |             |        |
| 1.006                                                |                                     |       |             |        |
| <b>Educational level</b>                             |                                     |       |             |        |
|                                                      | University                          | 1     |             |        |
|                                                      | Secondary                           | 1.123 | 0.752-1.677 | 0.572  |
|                                                      | Primary                             | 1.135 | 0.793-1.627 | 0.488  |
|                                                      | No completed                        | 1.148 | 0.768-1.717 | 0.501  |
| <b>Country of origin</b>                             |                                     |       |             |        |
|                                                      | Spain                               | 1     |             |        |
|                                                      | Foreign born                        | 0.300 | 0.124-0.729 | 0.008  |
| <b>Employment status</b>                             |                                     |       |             |        |
|                                                      | No Occupied                         | 1     |             |        |
|                                                      | Occupied                            | 0.603 | 0.409-0.890 | 0.011  |
| <b>Smoking</b>                                       |                                     |       |             |        |
|                                                      | Never smoker                        | 1     |             |        |
|                                                      | Former smoker                       | 0.836 | 0.644-1.085 | 0.177  |
|                                                      | Current smoker                      | 0.901 | 0.614-1.321 | 0.592  |
| <b>Family history of DM</b>                          |                                     |       |             |        |
|                                                      | No                                  | 1     |             |        |
|                                                      | Yes                                 | 1.144 | 0.924-1.418 | 0.217  |
| <b>Current Alcohol use</b>                           |                                     |       |             |        |
|                                                      | No                                  | 1     |             |        |
|                                                      | Yes                                 | 0.814 | 0.629-1.054 | 0.119  |
| <b>Physical activity</b>                             |                                     |       |             |        |
|                                                      | Sedentary                           | 1     |             |        |
|                                                      | Low                                 | 0.544 | 0.412-0.745 | <0.001 |
|                                                      | Moderate-Vigorous                   | 0.409 | 0.241-0.694 | 0.001  |
| <b>Diabetes Treatment</b>                            |                                     |       |             |        |
|                                                      | Oral anti-diabetic agents           | 1     |             |        |
|                                                      | Oral anti-diabetic agents + insulin | 1.421 | 1.075-1.878 | 0.014  |
|                                                      | Insulin                             | 1.568 | 1.008-2.439 | 0.045  |
|                                                      | Diet                                | 1.015 | 0.694-1.485 | 0.939  |
|                                                      | Unknown                             | 1.198 | 0.898-1.598 | 0.220  |
| <b>BMI (Kg/m<sup>2</sup>)[per unit of increment]</b> |                                     |       |             |        |
| 1.012                                                |                                     |       |             |        |
| <b>Systolic BP (mmHg)[per unit of increment]</b>     |                                     |       |             |        |
| 0.989                                                |                                     |       |             |        |
| <b>Diastolic BP (mmHg)[per unit of increment]</b>    |                                     |       |             |        |
| 0.984                                                |                                     |       |             |        |
| <b>Cholesterol (mg/dl) [per unit of increment]</b>   |                                     |       |             |        |
| 1.004                                                |                                     |       |             |        |
| <b>Neuropathy</b>                                    |                                     |       |             |        |
|                                                      | No                                  | 1     |             |        |
|                                                      | Yes                                 | 1.571 | 1.146-2.154 | 0.005  |
| <b>Nephropathy</b>                                   |                                     |       |             |        |

|                                                             |                          |       |              |        |
|-------------------------------------------------------------|--------------------------|-------|--------------|--------|
|                                                             | No                       | 1     |              |        |
|                                                             | Yes                      | 0.797 | 0.578-1.098  | 0.165  |
| <b>Retinopathy</b>                                          |                          |       |              |        |
|                                                             | No                       | 1     |              |        |
|                                                             | Yes                      | 0.958 | 0.716-1.282  | 0.772  |
| <b>Renal Failure</b>                                        |                          |       |              |        |
|                                                             | No                       | 1     |              |        |
|                                                             | Yes                      | 1.233 | 0.910-1.670  | 0.176  |
| <b>Self-reported Health status</b>                          |                          |       |              |        |
|                                                             | Excellent-very good-good | 1     |              |        |
|                                                             | Fair-poor                | 1.473 | 1.189-1.824  | <0.001 |
| <b>Family history of depression</b>                         |                          |       |              |        |
|                                                             | No                       | 1     |              |        |
|                                                             | Yes                      | 0.943 | 0.644-1.383  | 0.765  |
| <b>Personal history of depression</b>                       |                          |       |              |        |
|                                                             | No                       | 1     |              |        |
|                                                             | Yes                      | 8.039 | 6.394-10.108 | <0.001 |
| <b>Social support (network size)[per unit of increment]</b> |                          | 0.978 | 0.963-0.993  | 0.004  |
| <b>Physical health score (SF-12)</b>                        |                          |       |              |        |
|                                                             | Score $\geq$ mean        | 1     |              |        |
|                                                             | Score < mean             | 1.094 | 0.804-1.488  | 0.568  |
| <b>Mental health score (SF-12)</b>                          |                          |       |              |        |
|                                                             | Score $\geq$ mean        | 1     |              |        |
|                                                             | Score < mea              | 1.935 | 1.452-2.577  | <0.001 |
| <b>History of cancer</b>                                    |                          |       |              |        |
|                                                             | No                       | 1     |              |        |
|                                                             | Yes                      | 1.037 | 0.784-1.370  | 0.801  |
| <b>Cardiovascular disease</b>                               |                          |       |              |        |
|                                                             | No                       | 1     |              |        |
|                                                             | Yes                      | 1.273 | 1.002-1.617  | 0.049  |
| <b>Heart failure</b>                                        |                          |       |              |        |
|                                                             | No                       | 1     |              |        |
|                                                             | Yes                      | 0.927 | 0.647-1.327  | 0.678  |
| <b>Lower limb amputation</b>                                |                          |       |              |        |
|                                                             | No                       | 1     |              |        |
|                                                             | Yes                      | 0.918 | 0.387-2.182  | 0.847  |

OR: Odds Ratio; CI: Confidence Interval; BMI: Body Mass Index; BP: Blood Pressure; DMT2: Type 2 Diabetes Mellitus.

#### 4.3. Incidence of depression and predictive factors

1  
2  
3 During a median of 12 months of follow-up, a total of 363 patients developed a new episode of  
4 depression, constituting an annual incidence of 12.3% (95%CI, 11.12 to 13.48). There were  
5 differences by gender and age group: 6.5% (95%CI, 5.27 to 7.73) in men and 18.5% (95%CI,  
6 16.48 to 20.52) in women ( $p \leq 0.001$ ); 9.8% (95%CI, 7.79 to 11.81) in <65 years and 13.3%  
7 (95%CI, 11.85 to 14.75) in  $\geq 65$  years ( $p = 0.009$ ).

8  
9  
10  
11  
12  
13 As observed with the prevalence, a previous personal history of depression was the variable  
14 more strongly associated with incidence of depression (OR, 3.901; 95%CI, 3.017 to 5.045;  
15  $p \leq 0.001$ ). Other variables directly associated were: neuropathy (OR, 1.919; 95%CI, 1.351 to  
16 2.726;  $p \leq 0.001$ ), current smoking status (OR, 1.584; 95%CI, 1.025 to 2.448;  $p = 0.038$ ), age  
17 group  $\geq 65$  years (OR, 1.473; 95%CI, 1.013 to 2.142;  $P = 0.043$ ) and female gender (OR, 2.048;  
18 95%CI, 1.474 to 2.847;  $p \leq 0.001$ ). Low (OR, 0.565; 95% CI, 0.405 to 0.789;  $p \leq 0.001$ ), or  
19 moderate/vigorous physical activity (OR, 0.543; 95%CI, 0.293 to 1.006;  $p = 0.050$ ) were  
20 protective factors for depression, as well as systolic blood pressure (per each unit of  
21 increment) (OR, 0.984; 95%CI, 0.972 to 0.997;  $p = 0.014$ ), and social support (network size) (OR,  
22 0.972; 95%CI, 0.952 to 0.991;  $p = 0.004$ ) (Table 3).

23  
24  
25  
26  
27  
28  
29  
30  
31  
32  
33  
34  
35 **Table 3. Predictive factors for the development of Depression (Logistic Regression**  
36 **Analysis)**

|                                                             | OR    | 95% CI OR   | P-value |
|-------------------------------------------------------------|-------|-------------|---------|
| <b>Gender</b>                                               |       |             |         |
| Male                                                        | 1     |             |         |
| Female                                                      | 2.048 | 1.474-2.847 | <0.001  |
| <b>Age</b>                                                  |       |             |         |
| <65 years                                                   | 1     |             |         |
| ≥65 years                                                   | 1.473 | 1.013-2.142 | 0.043   |
| <b>Duration of DM2 (y)[per unit of increment]</b>           | 0.995 | 0.982-1.008 | 0.441   |
| <b>Country of origin</b>                                    |       |             |         |
| Spain                                                       | 1     |             |         |
| Foreign born                                                | 0.611 | 0.243-1.535 | 0.295   |
| <b>Employment status</b>                                    |       |             |         |
| No Occupied                                                 | 1     |             |         |
| Occupied                                                    | 0.926 | 0.578-1.482 | 0.748   |
| <b>Smoking</b>                                              |       |             |         |
| Never smoker                                                | 1     |             |         |
| Former smoker                                               | 0.937 | 0.684-1.284 | 0.685   |
| Current smoker                                              | 1.584 | 1.025-2.448 | 0.038   |
| <b>Physical activity</b>                                    |       |             |         |
| Sedentary                                                   | 1     |             |         |
| Low                                                         | 0.565 | 0.405-0.789 | 0.001   |
| Moderate-Vigorous                                           | 0.543 | 0.293-1.006 | 0.052   |
| <b>Systolic BP (mmHg)[per unit of increment]</b>            | 0.984 | 0.972-0.997 | 0.014   |
| <b>Diastolic BP (mmHg)[per unit of increment]</b>           | 1.005 | 0.985-1.026 | 0.633   |
| <b>Neuropathy</b>                                           |       |             |         |
| No                                                          | 1     |             |         |
| Yes                                                         | 1.919 | 1.351-2.726 | <0.001  |
| <b>Self-reported Health status</b>                          |       |             |         |
| Excellent-very good-good                                    | 1     |             |         |
| Fair-poor                                                   | 1.212 | 0.941-1.562 | 0.136   |
| <b>Personal history of depression</b>                       |       |             |         |
| No                                                          | 1     |             |         |
| Yes                                                         | 3.901 | 3.017-5.045 | <0.001  |
| <b>Social support (network size)[per unit of increment]</b> | 0.972 | 0.952-0.991 | 0.004   |
| <b>Lower limb amputation</b>                                |       |             |         |
| No                                                          | 1     |             |         |
| Yes                                                         | 0.918 | 0.387-2.182 | 0.847   |

OR: Odds Ratio; CI: Confidence Interval; BMI: Body Mass Index; BP: Blood Pressure; DM2: Type 2 Diabetes Mellitus; DM: Diabetes Mellitus.

Adjusted for educational level, family history of diabetes, alcohol use, nephropathy, retinopathy, renal failure, diabetes treatment, BMI, cholesterol, family history of depression, history of cancer, cardiovascular disease, heart failure, lower limb amputation and SF-12

## 5. Discussion

The association between diabetes and depression is well-known since at least three decades ago (4). The prevalence of depression in people with T2DM ranges widely due to various circumstances such as different depression assessment methods used (clinical interviews, questionnaires, self-report scales, or patient medical records), sample origin (clinical or outpatient screening population), ethnic subgroups, gender composition, and age intervals used. Two meta-analyses reported overall depression prevalence ranging from 17.6% to 27% (4). We analyzed the prevalence of depression in a cohort of patients with T2DM from the city of Madrid based on a clinical interview completed with prescribing and clinical data from CCRs. Depression was prevalent in 23.4% (n=691; CI 95%, 21.9 to 24.9) of our sample, a finding that is highly comparable to the recent estimates of 27.2% from Primary-Care settings and a Hospital Endocrinology Department in Mallorca (Spain) using the Beck Depression Inventory as screening tool (12). These figures represent a worrying clinical scenario, given the adverse impact of depression on the natural history of T2DM: poor metabolic control (26), non-adherence to treatment (27), and increased risk of vascular complications (8) .

Poor social support and negative life events (i.e., adverse socioeconomic circumstances, death of relatives) have been associated with depression in people with T2DM (29). These two factors are overrepresented in females in comparison with males (30) (31), and this phenomenon would explain the predominance of depression among females, as reported by a vast majority of studies (32) (33). However, not all the studies have confirmed this hypothesis (34).

After adjusting for gender and other known risk factors, our findings show that the risk of depression was reduced by 2.2% per unit of increment of network size, in the same line, the implementation of moderate or vigorous physical activity significantly reduced by 59.1% the risk of depression.

1  
2  
3 General practitioners should be encouraged to implement strategies designed to reduce the  
4 risk of depression in patients suffering from T2DM, especially in those with high-risk for  
5 depression for having chronic psychosocial stressors (28).  
6  
7

8  
9 We have shown an inverse association between both moderate-vigorous physical activity (OR  
10 0.409,  $p=0.001$ ) and social support (OR 0.978;  $p=0.004$ ) and depression; even though this  
11 association does not necessarily imply a causal relationship, it might urge the implementation  
12 of programs of physical activity and the creation of support groups focused on psychological  
13 well-being and the detection of depressive symptoms. Also, a better control of blood  
14 cholesterol levels might provide additional value (OR per unit of decrement, 0.996;  $p=0.016$ ).  
15  
16  
17  
18  
19  
20  
21  
22 Some of these aspects have proven to be effective and feasibility in older populations (35).

23  
24 On the other hand, it is necessary to keep in mind that treatment of depression can be a  
25 prerequisite for good diabetes control because people with diabetes might follow their  
26 treatment plan more easily if their mood is improved first (36).  
27  
28

29  
30 Other predictive factors of depression such as a previous depression episode or family history  
31 of depression are not modifiable factors for reducing the risk of developing depression, but  
32 health professionals must be alert to the presence of early symptoms of depression in order to  
33 treat this condition promptly. Indeed, routinely screening for psychosocial problems such as  
34 depression has supportive evidence from well-conducted cohort studies (37). In this sense,  
35 screening for depression with questionnaires has not enough specificity and needs to be  
36 complemented by a formal clinical assessment to confirm the diagnosis (36).  
37  
38  
39  
40  
41  
42  
43

44  
45 Occupied employment status was inversely associated with depression (OR, 0.603;  $p= 0.011$ ),  
46 as other studies have previously shown (38). This aspect suggests that going to work might  
47 have a protective role against depression due to social support received from the co-workers.  
48  
49

50  
51 After controlling for covariates, being foreign-born was negatively associated with depression  
52 (OR, 0.300;  $p=0.008$ ). This finding could reveal a social resilience processes, with an optimal  
53 development of social relations and social networks in the immigrating population. However,  
54  
55  
56  
57  
58  
59  
60

1  
2  
3 this hypothesis must be interpreted with caution, given that it is well-known that the  
4  
5 immigrant population is more vulnerable to depression than the native population (39).

6  
7 Of the classic complications of diabetes, neuropathy (OR, 1.571; P=0.005) and cardiovascular  
8  
9 disease (OR, 1.273; p=0.049) were the only ones significantly associated with depression.

10  
11 These study findings were consistent with several previous studies (8) (33). It would be logical  
12  
13 to think that micro- and macro-vascular complications of diabetes are associated with  
14  
15 depression, but the lack of association between retinopathy and nephropathy with depression  
16  
17 prevents the possibility of the so-called vascular depression, as has been reported in other  
18  
19 studies (40). Also, limb amputation showed a tendency to be a protective factor for incident  
20  
21 depression.

22  
23 As it was logical to suppose, subjects with depression showed lower values in the mental  
24  
25 health component score obtained from the SF-12, as other studies have reported (41).

26  
27 The participants with depression self-rated their own health status significantly lower than  
28  
29 those without depression, which is concordant with other studies (42). Given the known  
30  
31 relationship between fair/poor perceived health status and mortality (43), especially in  
32  
33 patients with chronic diseases (44), it would be advisable that patients with poor self-rated  
34  
35 health were enrolled in a health coaching program similar to that used in the Royal North  
36  
37 Shore Hospital, Sydney, Australia (45). In this program, those with diabetes who had the  
38  
39 lowest self-reported health status at baseline improved their rating in the first question of the  
40  
41 Short-Form 36 Quality of Life Instrument (SF-1) from 4.4 to 3.7 ( $P \leq 0.001$ ), and improved in  
42  
43 diabetes knowledge too, and their distress levels decreased significantly with respect to basal  
44  
45 values.  
46  
47

48  
49 Medications for lowering blood sugar (insulin alone or insulin plus oral anti-diabetic agents)  
50  
51 showed a significant association with depression (OR, 1.568; p=0.045 and OR, 1.421; p<0.001,  
52  
53 respectively). Prior studies have highlighted the same phenomenon: the glucose lowering  
54  
55 therapies that include insulin are strongly associated with depression (46). Two different  
56  
57  
58  
59

1  
2  
3 factors could be implicated in this link: first, the implementation of insulin therapy requires  
4  
5 painful injections and frequent glucose measurements and it can constitute a stressful life  
6  
7 event that is a potent risk factor for the onset of a depressive episode in the old age (47);  
8  
9 second, usually the use of insulin is necessary for situations of poor glycemic control, and it  
10  
11 could be that the non-optimal control of diabetes causes a worsening of mood, greater stress,  
12  
13 and less life-satisfaction.

14  
15 Regarding incidence of depression after one year of follow-up, the present study reveals a  
16  
17 value of 12.3%, which is in the range of prior researches (48) (5) (49) (50). In a meta-analysis  
18  
19 (51) that evaluated 16 studies to analyze the relationship between diabetes and depression,  
20  
21 the cumulative incidence of depression among people with diabetes ranged from 11.9%, after  
22  
23 two years of follow-up, (52) to 23.5%, after 5.9 years of follow-up (53). The conclusion of the  
24  
25 referred meta-analysis (51) is that there is evidence to support the hypothesis that diabetes is  
26  
27 a “depressogenic” condition. This affirmation implies a real public health problem that may be  
28  
29 resolved only by a specific prevention strategy.

30  
31  
32 Current smoking status was a factor not associated with the prevalence of depression, but  
33  
34 associated with its incidence. Other studies (54) had found the same association. In a recent  
35  
36 meta-analysis (54), eleven longitudinal studies analyzed the current smoking status as a  
37  
38 predictor factor for depression onset; five of them showed a significant risk of incidence of  
39  
40 depression (pooled HR, 1.40; 95% CI, 1.18 to 1.65;  $p \leq 0.001$ ), whereas six of them showed a  
41  
42 non-significant association (pooled HR, 1.15; 95% CI, 0.94 to 1.41).

#### 43 44 45 5.1. Conclusions

46  
47 Depression is very prevalent among patients with Type 2 Diabetes Mellitus and it was  
48  
49 associated with several key diabetes-related outcomes. Our results suggest that previous  
50  
51 mental status, self reported health status, and several complications related to diabetes  
52  
53 express differences in depression of the patients. We also found sex-related differences with  
54  
55 respect to the prevalence of depression. Our study highlights that the implementation of  
56  
57  
58  
59  
60



1  
2  
3 moderate or vigorous physical activity significantly reduced the risk of depression. These  
4 findings should alert practitioner to the importance of detection of depression in patients with  
5 Diabetes Mellitus Type 2, and to reduce the risk of depression with prevention group programs  
6  
7 focused on improve the physical activity of the patients and creation support groups.  
8  
9  
10  
11  
12

### 13 **Acknowledgements**

14  
15 The authors thank to all health professionals of Primary Health Care of Madrid who have made  
16 its development possible.  
17  
18  
19  
20

### 21 **Contributor Ship Statement**

22  
23 CBL and MASF designed the study and got funding. JCV, PGC, JCAH, and RCM contributed to  
24 data collection. FJSR, CBL, PGC and MASF analysed the data. PGC, MASF, and JMDY wrote the  
25 initial draft of the paper. RJG, ALA, CBL and ECS were involved in further drafting of the paper.  
26  
27 All authors participated in interpreting the data, revising the paper for critically important  
28 intellectual content and gave final approval of the submitted version.  
29  
30  
31  
32  
33  
34  
35

### 36 **Data Sharing Statement**

37  
38 No additional data are available  
39  
40  
41  
42

### 43 **Funding**

44  
45 This study forms part of research funded by the FIS (Fondo de Investigaciones Sanitarias—  
46 Health Research Fund, Instituto de Salud Carlos III) grants no.: PI10/02796, PI12/01806 and  
47 PI15/00259 and co-financed by the European Union through the Fondo Europeo de Desarrollo  
48 Regional (FEDER, “Una manera de hacer Europa”).  
49  
50  
51  
52

53  
54 The members of the MADIABETES Group are as follows : AM Sobrado-de Vicente-Tutor; Mar  
55 Sanz-Pascual; M Arnalte-Barrera; S Pulido-Fernández; EM Donaire-Jiménez; C Montero-Lizana;  
56  
57  
58  
59

1  
2  
3 M Domínguez-Paniagua; P Serrano-Simarro; R Echegoyen-de Nicolás; P Gil-Díaz; I Cerrada-  
4 Somolinos; R Martín-Cano; A Cava-Rosado; T Mesonero-Grandes; E Gómez-Navarro; D  
5 Beamud-Victoria; A Maestro-Martín; A Muñoz-Cildoz; ME Calonge-García; M Martín-Bun; P  
6 Carreño-Freire; J Fernández-García; A Morán-Escudero; J Martínez-Irazusta; E Calvo-García;  
7 AM Alayeto-Sánchez; C Reyes-Madrirdejos; MJ Bedoya-Frutos; B López-Sabater; J Innerarity-  
8 Martínez; A Rosillo-González; AI Menéndez-Fernández; F Mata-Benjumea; P Vich-Pérez; C  
9 Martín-Madrado; MJ Gomara-Martínez; C Bello-González; A Pinilla-Carrasco; M Camarero-  
10 Shelly; A Cano-Espin; J Castro Martin; B de Llama-Arauz; A de Miguel-Ballano; MA García-  
11 Alonso; JN García-Pascual; MI González-García; C López-Rodríguez; M Miguel-Garzón; MC  
12 Montero-García; S Muñoz-Quiros-Aliaga; S Núñez-Palomo; O Olmos-Carrasco; N Pertierra-  
13 Galindo; G Reviriego-Jaén; P Rius-Fortea; G Rodríguez-Castro; JM San Vicente-Rodríguez; ME  
14 Serrano-Serrano; MM Zamora-Gómez; and MP Zazo-Lázaro.

### 25 26 27 28 29 **Competing interests**

30 The authors declare that there is no duality of interest associated with this manuscript.  
31  
32  
33

### 34 **References**

- 35  
36 1. Worldwide trends in diabetes since 1980: a pooled analysis of 751 population-based studies with  
37 4.4 million participants. *The Lancet*. 2016 Apr;387(10027):1513–30.
- 38  
39 2. Soriguer F, Goday A, Bosch-Comas A, Bordiú E, Calle-Pascual A, Carmena R, et al. Prevalence of  
40 diabetes mellitus and impaired glucose regulation in Spain: the Di@bet.es Study. *Diabetologia*.  
41 2012 Jan;55(1):88–93.
- 42  
43 3. Knol MJ, Twisk JWR, Beekman ATF, Heine RJ, Snoek FJ, Pouwer F. Depression as a risk factor for  
44 the onset of type 2 diabetes mellitus. A meta-analysis. *Diabetologia*. 2006 May;49(5):837–45.
- 45  
46 4. Anderson RJ, Freedland KE, Clouse RE, Lustman PJ. The prevalence of comorbid depression in  
47 adults with diabetes: a meta-analysis. *Diabetes Care*. 2001 Jun;24(6):1069–78.
- 48  
49 5. Golden SH, Lazo M, Carnethon M, Bertoni AG, Schreiner PJ, Diez Roux AV, et al. Examining a  
50 bidirectional association between depressive symptoms and diabetes. *JAMA*. 2008 Jun  
51 18;299(23):2751–9.
- 52  
53 6. Lunghi C, Moisan J, Grégoire J-P, Guénette L. Incidence of Depression and Associated Factors in  
54 Patients With Type 2 Diabetes in Quebec, Canada: A Population-Based Cohort Study. *Medicine*  
55 (Baltimore). 2016 May;95(21):e3514.

- 1
  - 2
  - 3
  - 4
  - 5
  - 6
  - 7
  - 8
  - 9
  - 10
  - 11
  - 12
  - 13
  - 14
  - 15
  - 16
  - 17
  - 18
  - 19
  - 20
  - 21
  - 22
  - 23
  - 24
  - 25
  - 26
  - 27
  - 28
  - 29
  - 30
  - 31
  - 32
  - 33
  - 34
  - 35
  - 36
  - 37
  - 38
  - 39
  - 40
  - 41
  - 42
  - 43
  - 44
  - 45
  - 46
  - 47
  - 48
  - 49
  - 50
  - 51
  - 52
  - 53
  - 54
  - 55
  - 56
  - 57
  - 58
  - 59
  - 60
7. van Dooren FEP, Nefs G, Schram MT, Verhey FRJ, Denollet J, Pouwer F. Depression and risk of mortality in people with diabetes mellitus: a systematic review and meta-analysis. *PLoS One*. 2013;8(3):e57058.
  8. de Groot M, Anderson R, Freedland KE, Clouse RE, Lustman PJ. Association of depression and diabetes complications: a meta-analysis. *Psychosom Med*. 2001 Aug;63(4):619–30.
  9. Lustman PJ, Clouse RE. Depression in diabetic patients: the relationship between mood and glycemic control. *J Diabetes Complications*. 2005 Apr;19(2):113–22.
  10. Schram MT, Baan CA, Pouwer F. Depression and quality of life in patients with diabetes: a systematic review from the European depression in diabetes (EDID) research consortium. *Curr Diabetes Rev*. 2009 May;5(2):112–9.
  11. Jimenez-Garcia R, Martinez Huedo MA, Hernandez-Barrera V, Lopez de Andres A, Martinez D, Jimenez-Trujillo I, et al. Psychological distress and mental disorders among Spanish diabetic adults: a case-control study. *Prim Care Diabetes*. 2012 Jul;6(2):149–56.
  12. Nicolau J, Simó R, Sanchís P, Ayala L, Fortuny R, Rivera R, et al. Prevalence and Clinical Correlators of Undiagnosed Significant Depressive Symptoms Among Individuals with Type 2 Diabetes In A Mediterranean Population. *Exp Clin Endocrinol Diabetes Off J Ger Soc Endocrinol Ger Diabetes Assoc*. 2016 Nov;124(10):630–6.
  13. Lopez-de-Andrés A, Jiménez-Trujillo MI, Hernández-Barrera V, de Miguel-Yanes JM, Méndez-Bailón M, Perez-Farinos N, et al. Trends in the prevalence of depression in hospitalized patients with type 2 diabetes in Spain: analysis of hospital discharge data from 2001 to 2011. *PLoS One*. 2015;10(2):e0117346.
  14. Alonso-Morán E, Satyrganova A, Orueta JF, Nuño-Solinis R. Prevalence of depression in adults with type 2 diabetes in the Basque Country: relationship with glycaemic control and health care costs. *BMC Public Health*. 2014 Jul 30;14:769.
  15. Esteban y Peña MM, Hernandez Barrera V, Fernández Cordero X, Gil de Miguel A, Rodríguez Pérez M, Lopez-de Andres A, et al. Self-perception of health status, mental health and quality of life among adults with diabetes residing in a metropolitan area. *Diabetes Metab*. 2010 Sep;36(4):305–11.
  16. Hervás A, Zabaleta A, De Miguel G, Beldarráin O, Díez J. [Health related quality of life in patients with diabetes mellitus type 2]. *An Sist Sanit Navar*. 2007 Apr;30(1):45–52.
  17. Salinero-Fort MÁ, San Andrés-Rebollo FJ, de Burgos-Lunar C, Arrieta-Blanco FJ, Gómez-Campelo P, MADIABETES Group. Four-year incidence of diabetic retinopathy in a Spanish cohort: the MADIABETES study. *PLoS One*. 2013;8(10):e76417.
  18. de Burgos-Lunar C, Gómez-Campelo P, Cárdenas-Valladolid J, Fuentes-Rodríguez CY, Granados-Menéndez MI, López-López F, et al. Effect of depression on mortality and cardiovascular morbidity in type 2 diabetes mellitus after 3 years follow up. The DIADEMA study protocol. *BMC Psychiatry*. 2012 Jul 30;12:95.
  19. World Organization of National Colleges, Academies, and Academic Associations of General Practitioners/Family Physicians, editor. *ICPC-2-R: international classification of primary care*. Rev. 2nd ed. Oxford ; New York: Oxford University Press; 2005. 193 p. (Oxford medical publications).
  20. World Health Organization, editor. *International statistical classification of diseases and related health problems*. 10th revision, 2nd edition. Geneva: World Health Organization; 2004. 3 p.

- 1
  - 2
  - 3
  - 4
  - 5
  - 6
  - 7
  - 8
  - 9
  - 10
  - 11
  - 12
  - 13
  - 14
  - 15
  - 16
  - 17
  - 18
  - 19
  - 20
  - 21
  - 22
  - 23
  - 24
  - 25
  - 26
  - 27
  - 28
  - 29
  - 30
  - 31
  - 32
  - 33
  - 34
  - 35
  - 36
  - 37
  - 38
  - 39
  - 40
  - 41
  - 42
  - 43
  - 44
  - 45
  - 46
  - 47
  - 48
  - 49
  - 50
  - 51
  - 52
  - 53
  - 54
  - 55
  - 56
  - 57
  - 58
  - 59
  - 60
21. Pan A, Lucas M, Sun Q, van Dam RM, Franco OH, Willett WC, et al. Increased Mortality Risk in Women With Depression and Diabetes Mellitus. *Arch Gen Psychiatry*. 2011 Jan 3;68(1):42.
22. Sheehan DV, Lecrubier Y, Sheehan KH, Amorim P, Janavs J, Weiller E, et al. The Mini-International Neuropsychiatric Interview (M.I.N.I.): the development and validation of a structured diagnostic psychiatric interview for DSM-IV and ICD-10. *J Clin Psychiatry*. 1998;59 Suppl 20:22-33;quiz 34-57.
23. Ferrando L, Bobes J, Gibert J, Soto M, Soto O. Mini International Neuropsychiatric Interview. Versión en español 5.0.0. 2000: Madrid.
24. Sherbourne CD, Stewart AL. The MOS social support survey. *Soc Sci Med* 1982. 1991;32(6):705–14.
25. Ware JE, Kosinski M, Keller SD. How to score the SF-12 physical and mental health summaries: a user's manual. Boston: New England Medical Centre; 1995.
26. Egede LE, Ellis C. Diabetes and depression: global perspectives. *Diabetes Res Clin Pract*. 2010 Mar;87(3):302–12.
27. Lin EHB, Katon W, Rutter C, Simon GE, Ludman EJ, Von Korff M, et al. Effects of enhanced depression treatment on diabetes self-care. *Ann Fam Med*. 2006 Feb;4(1):46–53.
28. Lin EHB, Rutter CM, Katon W, Heckbert SR, Ciechanowski P, Oliver MM, et al. Depression and advanced complications of diabetes: a prospective cohort study. *Diabetes Care*. 2010 Feb;33(2):264–9.
29. Habtewold TD, Alemu SM, Haile YG. Sociodemographic, clinical, and psychosocial factors associated with depression among type 2 diabetic outpatients in Black Lion General Specialized Hospital, Addis Ababa, Ethiopia: a cross-sectional study. *BMC Psychiatry* [Internet]. 2016 Dec [cited 2017 Aug 25];16(1). Available from: <http://bmcp psychiatry.biomedcentral.com/articles/10.1186/s12888-016-0809-6>
30. Kraaij V, Arensman E, Spinhoven P. Negative Life Events and Depression in Elderly Persons: A Meta-Analysis. *J Gerontol B Psychol Sci Soc Sci*. 2002 Jan 1;57(1):P87–94.
31. Krag MØ, Hasselbalch L, Siersma V, Nielsen ABS, Reventlow S, Malterud K, et al. The impact of gender on the long-term morbidity and mortality of patients with type 2 diabetes receiving structured personal care: a 13 year follow-up study. *Diabetologia*. 2016 Feb;59(2):275–85.
32. Cols-Sagarra C, López-Simarro F, Alonso-Fernández M, Mancera-Romero J, Pérez-Unanua MP, Mediavilla-Bravo JJ, et al. Prevalence of depression in patients with type 2 diabetes attended in primary care in Spain. *Prim Care Diabetes*. 2016 Oct;10(5):369–75.
33. Naranjo DM, Fisher L, Areán PA, Hessler D, Mullan J. Patients with type 2 diabetes at risk for major depressive disorder over time. *Ann Fam Med*. 2011 Apr;9(2):115–20.
34. Dalgard OS, Dowrick C, Lehtinen V, Vazquez-Barquero JL, Casey P, Wilkinson G, et al. Negative life events, social support and gender difference in depression: a multinational community survey with data from the ODIN study. *Soc Psychiatry Psychiatr Epidemiol*. 2006 Jun;41(6):444–51.
35. Cole MG. Brief interventions to prevent depression in older subjects: a systematic review of feasibility and effectiveness. *Am J Geriatr Psychiatry Off J Am Assoc Geriatr Psychiatry*. 2008 Jun;16(6):435–43.
36. Petrak F, Baumeister H, Skinner TC, Brown A, Holt RIG. Depression and diabetes: treatment and health-care delivery. *Lancet Diabetes Endocrinol*. 2015 Jun;3(6):472–85.

- 1
- 2
- 3 37. Standards of Medical Care in Diabetes—2016 Abridged for Primary Care Providers. *Clin Diabetes*. 2016 Jan;34(1):3–21.
- 4
- 5 38. Mocan AS, Iancu SS, Duma L, Mureseanu C, Baban AS. Depression in romanian patients with type 2 diabetes: prevalence and risk factors. *Clujul Med* 1957. 2016;89(3):371–7.
- 6
- 7
- 8 39. Salinero-Fort MA, Jiménez-García R, de Burgos-Lunar C, Chico-Moraleja RM, Gómez-Campelo P. Common mental disorders in primary health care: differences between Latin American-born and Spanish-born residents in Madrid, Spain. *Soc Psychiatry Psychiatr Epidemiol*. 2015 Mar;50(3):429–43.
- 9
- 10
- 11
- 12
- 13 40. Yoshida S, Hirai M, Suzuki S, Awata S, Oka Y. Neuropathy is associated with depression independently of health-related quality of life in Japanese patients with diabetes. *Psychiatry Clin Neurosci*. 2009 Feb;63(1):65–72.
- 14
- 15
- 16
- 17 41. Sundaram M, Kavookjian J, Patrick JH, Miller L-A, Madhavan SS, Scott VG. Quality of life, health status and clinical outcomes in Type 2 diabetes patients. *Qual Life Res Int J Qual Life Asp Treat Care Rehabil*. 2007 Mar;16(2):165–77.
- 18
- 19
- 20
- 21 42. McCollum M, Ellis SL, Regensteiner JG, Zhang W, Sullivan PW. Minor depression and health status among US adults with diabetes mellitus. *Am J Manag Care*. 2007 Feb;13(2):65–72.
- 22
- 23
- 24 43. Mossey JM, Shapiro E. Self-rated health: a predictor of mortality among the elderly. *Am J Public Health*. 1982 Aug;72(8):800–8.
- 25
- 26
- 27 44. Idler EL, Benyamini Y. Self-rated health and mortality: a review of twenty-seven community studies. *J Health Soc Behav*. 1997 Mar;38(1):21–37.
- 28
- 29
- 30 45. Delaney G, Newlyn N, Pamplona E, Hocking SL, Glastras SJ, McGrath RT, et al. Identification of Patients With Diabetes Who Benefit Most From a Health Coaching Program in Chronic Disease Management, Sydney, Australia, 2013. *Prev Chronic Dis*. 2017 Mar 2;14:E21.
- 31
- 32
- 33 46. Otieno CF, Kanu JE, Karari EM, Okech-Helu V, Joshi MD, Mutai K. Glucose-lowering therapies, adequacy of metabolic control, and their relationship with comorbid depression in outpatients with type 2 diabetes in a tertiary hospital in Kenya. *Diabetes Metab Syndr Obes Targets Ther*. 2017;10:141–9.
- 34
- 35
- 36
- 37
- 38 47. Brilman EI, Ormel J. Life events, difficulties and onset of depressive episodes in later life. *Psychol Med*. 2001 Jul;31(5):859–69.
- 39
- 40
- 41 48. de Jonge P, Roy JF, Saz P, Marcos G, Lobo A, ZARADEMP Investigators. Prevalent and incident depression in community-dwelling elderly persons with diabetes mellitus: results from the ZARADEMP project. *Diabetologia*. 2006 Nov;49(11):2627–33.
- 42
- 43
- 44
- 45 49. Knol MJ, Heerdink ER, Egberts ACG, Geerlings MI, Gorter KJ, Numans ME, et al. Depressive symptoms in subjects with diagnosed and undiagnosed type 2 diabetes. *Psychosom Med*. 2007 May;69(4):300–5.
- 46
- 47
- 48
- 49 50. Nouwen A, Winkley K, Twisk J, Lloyd CE, Peyrot M, Ismail K, et al. Type 2 diabetes mellitus as a risk factor for the onset of depression: a systematic review and meta-analysis. *Diabetologia*. 2010 Dec;53(12):2480–6.
- 50
- 51
- 52 51. Hasan SS, Mamun AA, Clavarino AM, Kairuz T. Incidence and risk of depression associated with diabetes in adults: evidence from longitudinal studies. *Community Ment Health J*. 2015 Feb;51(2):204–10.
- 53
- 54
- 55
- 56
- 57
- 58
- 59
- 60

- 1  
2  
3 52. Kim J-M, Stewart R, Kim S-W, Yang S-J, Shin I-S, Yoon J-S. Vascular risk factors and incident late-life  
4 depression in a Korean population. *Br J Psychiatry J Ment Sci*. 2006 Jul;189:26–30.  
5  
6 53. Maraldi C, Volpato S, Penninx BW, Yaffe K, Simonsick EM, Strotmeyer ES, et al. Diabetes mellitus,  
7 glycemic control, and incident depressive symptoms among 70- to 79-year-old persons: the  
8 health, aging, and body composition study. *Arch Intern Med*. 2007 Jun 11;167(11):1137–44.  
9  
10 54. Rotella F, Mannucci E. Diabetes mellitus as a risk factor for depression. A meta-analysis of  
11 longitudinal studies. *Diabetes Res Clin Pract*. 2013 Feb;99(2):98–104.  
12  
13  
14  
15  
16  
17  
18  
19  
20  
21  
22  
23  
24  
25  
26  
27  
28  
29  
30  
31  
32  
33  
34  
35  
36  
37  
38  
39  
40  
41  
42  
43  
44  
45  
46  
47  
48  
49  
50  
51  
52  
53  
54  
55  
56  
57  
58  
59  
60

1  
2  
3  
4  
5  
6  
7  
8  
9  
10  
11  
12  
13  
14  
15  
16  
17  
18  
19  
20  
21  
22  
23  
24  
25  
26  
27  
28  
29  
30  
31  
32  
33  
34  
35  
36  
37  
38  
39  
40  
41  
42  
43  
44  
45  
46  
47  
48  
49  
50  
51  
52  
53  
54  
55  
56  
57  
58  
59  
60

**Figure 1- Flowchart**

For peer review only

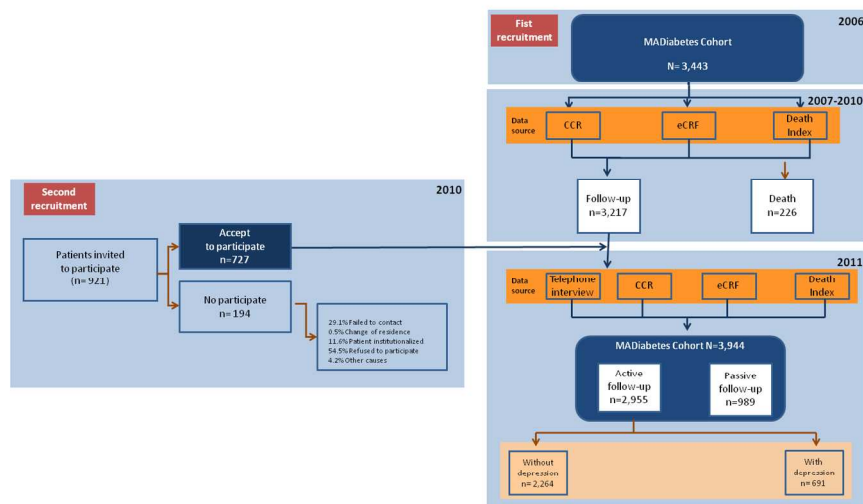

450x350mm (96 x 96 DPI)



## STROBE Statement—checklist of items that should be included in reports of observational studies

|                              | Item No         | Recommendation                                                                                                                                                                                                                                                                                                                                                                                                                                                                                                                                                                                                                                                                                   |
|------------------------------|-----------------|--------------------------------------------------------------------------------------------------------------------------------------------------------------------------------------------------------------------------------------------------------------------------------------------------------------------------------------------------------------------------------------------------------------------------------------------------------------------------------------------------------------------------------------------------------------------------------------------------------------------------------------------------------------------------------------------------|
| <b>Title and abstract</b>    | 1<br>Pag. 1     | (a) Indicate the study's design with a commonly used term in the title or the abstract<br>(b) Provide in the abstract an informative and balanced summary of what was done and what was found                                                                                                                                                                                                                                                                                                                                                                                                                                                                                                    |
| <b>Introduction</b>          |                 |                                                                                                                                                                                                                                                                                                                                                                                                                                                                                                                                                                                                                                                                                                  |
| Background/rationale         | 2<br>Pag. 5     | Explain the scientific background and rationale for the investigation being reported                                                                                                                                                                                                                                                                                                                                                                                                                                                                                                                                                                                                             |
| Objectives                   | 3<br>Pag. 5     | State specific objectives, including any prespecified hypotheses                                                                                                                                                                                                                                                                                                                                                                                                                                                                                                                                                                                                                                 |
| <b>Methods</b>               |                 |                                                                                                                                                                                                                                                                                                                                                                                                                                                                                                                                                                                                                                                                                                  |
| Study design                 | 4<br>Pag. 6     | Present key elements of study design early in the paper                                                                                                                                                                                                                                                                                                                                                                                                                                                                                                                                                                                                                                          |
| Setting                      | 5<br>Pag. 6     | Describe the setting, locations, and relevant dates, including periods of recruitment, exposure, follow-up, and data collection                                                                                                                                                                                                                                                                                                                                                                                                                                                                                                                                                                  |
| Participants                 | 6<br>Pag. 6     | (a) <i>Cohort study</i> —Give the eligibility criteria, and the sources and methods of selection of participants. Describe methods of follow-up<br><i>Case-control study</i> —Give the eligibility criteria, and the sources and methods of case ascertainment and control selection. Give the rationale for the choice of cases and controls<br><i>Cross-sectional study</i> —Give the eligibility criteria, and the sources and methods of selection of participants<br>(b) <i>Cohort study</i> —For matched studies, give matching criteria and number of exposed and unexposed<br><i>Case-control study</i> —For matched studies, give matching criteria and the number of controls per case |
| Variables                    | 7<br>Pag. 8-10  | Clearly define all outcomes, exposures, predictors, potential confounders, and effect modifiers. Give diagnostic criteria, if applicable                                                                                                                                                                                                                                                                                                                                                                                                                                                                                                                                                         |
| Data sources/<br>measurement | 8*<br>Pag. 7-8  | For each variable of interest, give sources of data and details of methods of assessment (measurement). Describe comparability of assessment methods if there is more than one group                                                                                                                                                                                                                                                                                                                                                                                                                                                                                                             |
| Bias                         | 9<br>Pag. 10    | Describe any efforts to address potential sources of bias                                                                                                                                                                                                                                                                                                                                                                                                                                                                                                                                                                                                                                        |
| Study size                   | 10<br>Pag. 6    | Explain how the study size was arrived at                                                                                                                                                                                                                                                                                                                                                                                                                                                                                                                                                                                                                                                        |
| Quantitative variables       | 11<br>Pag. 8-10 | Explain how quantitative variables were handled in the analyses. If applicable, describe which groupings were chosen and why                                                                                                                                                                                                                                                                                                                                                                                                                                                                                                                                                                     |
| Statistical methods          | 12<br>Pag. 10   | (a) Describe all statistical methods, including those used to control for confounding<br>(b) Describe any methods used to examine subgroups and interactions<br>(c) Explain how missing data were addressed<br>(d) <i>Cohort study</i> —If applicable, explain how loss to follow-up was addressed                                                                                                                                                                                                                                                                                                                                                                                               |

1  
2 *Case-control study*—If applicable, explain how matching of cases and controls was  
3 addressed

4 *Cross-sectional study*—If applicable, describe analytical methods taking account of  
5 sampling strategy

---

6  
7 (e) Describe any sensitivity analyses

8 Continued on next page  
9  
10  
11  
12  
13  
14  
15  
16  
17  
18  
19  
20  
21  
22  
23  
24  
25  
26  
27  
28  
29  
30  
31  
32  
33  
34  
35  
36  
37  
38  
39  
40  
41  
42  
43  
44  
45  
46  
47  
48  
49  
50  
51  
52  
53  
54  
55  
56  
57  
58  
59  
60

**Results**

|                  |     |                                                                                                                                                                                                                                                                                                                                                                                                               |
|------------------|-----|---------------------------------------------------------------------------------------------------------------------------------------------------------------------------------------------------------------------------------------------------------------------------------------------------------------------------------------------------------------------------------------------------------------|
| Participants     | 13* | (a) Report numbers of individuals at each stage of study—eg numbers potentially eligible, examined for eligibility, confirmed eligible, included in the study, completing follow-up, and analysed<br>(b) Give reasons for non-participation at each stage<br>(c) Consider use of a flow diagram                                                                                                               |
| Descriptive data | 14* | (a) Give characteristics of study participants (eg demographic, clinical, social) and information on exposures and potential confounders<br>(b) Indicate number of participants with missing data for each variable of interest<br>(c) <i>Cohort study</i> —Summarise follow-up time (eg, average and total amount)                                                                                           |
| Outcome data     | 15* | <i>Cohort study</i> —Report numbers of outcome events or summary measures over time<br><i>Case-control study</i> —Report numbers in each exposure category, or summary measures of exposure<br><i>Cross-sectional study</i> —Report numbers of outcome events or summary measures                                                                                                                             |
| Main results     | 16  | (a) Give unadjusted estimates and, if applicable, confounder-adjusted estimates and their precision (eg, 95% confidence interval). Make clear which confounders were adjusted for and why they were included<br>(b) Report category boundaries when continuous variables were categorized<br>(c) If relevant, consider translating estimates of relative risk into absolute risk for a meaningful time period |
| Other analyses   | 17  | Report other analyses done—eg analyses of subgroups and interactions, and sensitivity analyses                                                                                                                                                                                                                                                                                                                |

**Discussion**

|                  |    |                                                                                                                                                                            |
|------------------|----|----------------------------------------------------------------------------------------------------------------------------------------------------------------------------|
| Key results      | 18 | Summarise key results with reference to study objectives                                                                                                                   |
| Limitations      | 19 | Discuss limitations of the study, taking into account sources of potential bias or imprecision. Discuss both direction and magnitude of any potential bias                 |
| Interpretation   | 20 | Give a cautious overall interpretation of results considering objectives, limitations, multiplicity of analyses, results from similar studies, and other relevant evidence |
| Generalisability | 21 | Discuss the generalisability (external validity) of the study results                                                                                                      |

**Other information**

|         |    |                                                                                                                                                               |
|---------|----|---------------------------------------------------------------------------------------------------------------------------------------------------------------|
| Funding | 22 | Give the source of funding and the role of the funders for the present study and, if applicable, for the original study on which the present article is based |
|---------|----|---------------------------------------------------------------------------------------------------------------------------------------------------------------|

\*Give information separately for cases and controls in case-control studies and, if applicable, for exposed and unexposed groups in cohort and cross-sectional studies.

**Note:** An Explanation and Elaboration article discusses each checklist item and gives methodological background and published examples of transparent reporting. The STROBE checklist is best used in conjunction with this article (freely available on the Web sites of PLoS Medicine at <http://www.plosmedicine.org/>, Annals of Internal Medicine at <http://www.annals.org/>, and Epidemiology at <http://www.epidem.com/>). Information on the STROBE Initiative is available at [www.strobe-statement.org](http://www.strobe-statement.org).

# BMJ Open

## The DIADEMA Study- Prevalence of depression in patients with Type 2 Diabetes Mellitus: Results from the MADiabetes Cohort

|                                 |                                                                                                                                                                                                                                                                                                                                                                                                                                                                                                                                                                                                                                                                                                                                                                                                                                                                                                                                                                                                                                                                                                                                                                                                                |
|---------------------------------|----------------------------------------------------------------------------------------------------------------------------------------------------------------------------------------------------------------------------------------------------------------------------------------------------------------------------------------------------------------------------------------------------------------------------------------------------------------------------------------------------------------------------------------------------------------------------------------------------------------------------------------------------------------------------------------------------------------------------------------------------------------------------------------------------------------------------------------------------------------------------------------------------------------------------------------------------------------------------------------------------------------------------------------------------------------------------------------------------------------------------------------------------------------------------------------------------------------|
| Journal:                        | <i>BMJ Open</i>                                                                                                                                                                                                                                                                                                                                                                                                                                                                                                                                                                                                                                                                                                                                                                                                                                                                                                                                                                                                                                                                                                                                                                                                |
| Manuscript ID                   | bmjopen-2017-020768.R1                                                                                                                                                                                                                                                                                                                                                                                                                                                                                                                                                                                                                                                                                                                                                                                                                                                                                                                                                                                                                                                                                                                                                                                         |
| Article Type:                   | Research                                                                                                                                                                                                                                                                                                                                                                                                                                                                                                                                                                                                                                                                                                                                                                                                                                                                                                                                                                                                                                                                                                                                                                                                       |
| Date Submitted by the Author:   | 13-Mar-2018                                                                                                                                                                                                                                                                                                                                                                                                                                                                                                                                                                                                                                                                                                                                                                                                                                                                                                                                                                                                                                                                                                                                                                                                    |
| Complete List of Authors:       | <p>SALINERO-FORT, MIGUEL; Servicio Madrileño de Salud, Gerencia de Atención Primaria<br/> GÓMEZ-CAMPELO, PALOMA; Fundación Investigación Biomédica Hospital Universitario La Paz, IdiPAZ; Universidad Antonio de Nebrija Ciencias de la Salud, Centro de Ciencias de la Salud San Rafael<br/> San Andrés-Rebollo, Javier; Servicio Madrileño de Salud<br/> Cárdenas-Valladolid, Juan; Comunidad de Madrid Servicio Madrileño de Salud<br/> ABANADES-HERRANZ, JUAN; Servicio Madrileño de Salud, Gerencia Adjunta Planificación y Calidad de Atención Primaria<br/> Carrillo de Santa Pau, Enrique; Centro Nacional de Investigaciones Oncológicas<br/> Chico-Moraleja, Rosa; Hospital Central de la Defensa Gomez Ulla<br/> Beamud-Victoria, Domingo; Comunidad de Madrid Servicio Madrileño de Salud, Centro de Salud Felipe II<br/> de Miguel-Yanes, Jose; Hospital General Universitario Gregorio Marañón, Internal Medicine Department<br/> Jimenez-Garcia, Rodrigo; Univ Rey Juan Carlos,<br/> Lopez-de-Andres, Ana ; Universidad Rey Juan Carlos, Preventive Medicine and Public Health Teaching and Research Unit.<br/> DE BURGOS-LUNAR, CARMEN; Hospital Universitario La Paz, Medicina Preventiva</p> |
| <b>Primary Subject Heading</b>: | Diabetes and endocrinology                                                                                                                                                                                                                                                                                                                                                                                                                                                                                                                                                                                                                                                                                                                                                                                                                                                                                                                                                                                                                                                                                                                                                                                     |
| Secondary Subject Heading:      | Mental health, Epidemiology                                                                                                                                                                                                                                                                                                                                                                                                                                                                                                                                                                                                                                                                                                                                                                                                                                                                                                                                                                                                                                                                                                                                                                                    |
| Keywords:                       | Depression, Diabetes Mellitus, Type 2, Self-Care, Cohort Studies                                                                                                                                                                                                                                                                                                                                                                                                                                                                                                                                                                                                                                                                                                                                                                                                                                                                                                                                                                                                                                                                                                                                               |
|                                 |                                                                                                                                                                                                                                                                                                                                                                                                                                                                                                                                                                                                                                                                                                                                                                                                                                                                                                                                                                                                                                                                                                                                                                                                                |

SCHOLARONE™  
Manuscripts

1  
2  
3 **The DIADEMA Study- Prevalence of depression in patients with Type 2 Diabetes Mellitus:**  
4  
5 **Results from the MADiabetes Cohort.**  
6

7  
8  
9 Salinero-Fort, M.A.<sup>1,§</sup>; Gómez-Campelo, P.<sup>2,3,§,\*</sup>, San Andrés-Rebollo, F.J.<sup>4</sup>; Cárdenas-Valladolid,  
10 J.<sup>5</sup>; Abánades-Herranz, J.C.<sup>6</sup>; Carrillo de Santa Pau, E.<sup>7</sup>; Chico-Moraleja, R.M.<sup>8</sup>; Beamud-Victoria,  
11 D.<sup>9</sup>; de Miguel-Yanes, J.M.<sup>10</sup>; Jiménez-García, R.<sup>11</sup>; López-de Andrés A.<sup>11</sup>; and De Burgos-Lunar,  
12 C.<sup>12</sup>. On behalf of MADIABETES Research Group.  
13  
14  
15

- 16  
17  
18 1. Subdirección General de Investigación Sanitaria. Consejería de Sanidad, Madrid,  
19 Spain.  
20
- 21  
22 2. Hospital La Paz Institute for Health Research (IdiPAZ), La Paz University Hospital,  
23 Madrid, Spain.  
24
- 25  
26 3. Centro de Ciencias de la Salud San Rafael, Universidad Antonio de Nebrija, Madrid,  
27 Spain  
28
- 29  
30 4. Centro de Salud Las Calesas, Servicio Madrileño de Salud, Madrid, Spain.  
31
- 32  
33 5. Gerencia Adjunta de Planificación y Calidad, Gerencia de Atención Primaria, Servicio  
34 Madrileño de Salud, Madrid, Spain.  
35
- 36  
37 6. Centro de Salud Monóvar, Servicio Madrileño de Salud, Madrid, Spain.  
38
- 39  
40 7. Centro Nacional de Investigaciones Oncológicas, Madrid, Spain.  
41
- 42  
43 8. Hospital Central de la Defensa, Madrid, Spain.  
44
- 45  
46 9. Centro de Salud Felipe II, Madrid, Spain  
47
- 48  
49 10. Hospital Gregorio Marañón, Madrid, Spain.  
50
- 51  
52 11. Facultad de Ciencias de la Salud, Universidad Rey Juan Carlos, Alcorcón, Madrid, Spain.  
53
- 54  
55 12. Centro de Salud Isla de Oza, Servicio Madrileño de Salud, Madrid, Spain.  
56

57  
58  
59  
60  
§ Equal contribution

1  
2  
3 **\* Corresponding author:**

4  
5 P. Gómez-Campelo

6  
7 Hospital La Paz Institute for Health Research (IdiPAZ), La Paz University Hospital, Madrid,

8  
9 Spain

10  
11 [pgomez@salud.madrid.org](mailto:pgomez@salud.madrid.org)

12  
13 Address: Pº de la Castellana, 261

14  
15 28046 Madrid

16  
17 Phone: +34 91 207 14 44

18  
19 Fax: +34 91 727 75 24

## 1. Abstract

Objective: To estimate the prevalence of depression in patients diagnosed with type 2 diabetes mellitus (T2DM), and to identify sociodemographic, clinical, and psychological factors associated with depression in this population. Additionally, we examine the annual incidence rate of depression among T2DM patients.

Methods: We performed a large prospective cohort study of patients with T2DM from MADIABETES Study. The first recruitment drive was included 3,443 patients. A second recruitment drive included 727 new patients. Data have been collected since 2007 (baseline visit) and annually during the follow-up period (since 2008).

Results: Depression was prevalent in 20.03% of patients (n=592; 95%CI, 18.6 to 21.5), and was associated with previous personal history of depression (OR, 6.482; 95%CI, 5.138 to 8.178), mental health status below mean (OR, 1.423; 95%CI, 1.452 to 2.577), neuropathy (OR, 1.951; 95%CI, 1.423 to 2.674), fair or poor self reported health status (OR, 1.509; 95%CI, 1.209 to 1.882), treatment with oral antidiabetic agents plus insulin (OR, 1.802; 95%CI, 1.364 to 2.380), female gender (OR, 1.333; 95%CI, 1.009 to 1.761), and blood cholesterol level (OR, 1.005; 95%CI, 1.002 to 1.009).

The variables inversely associated with depression were: being in employment (OR, 0.595; 95%CI, 0.397 to 0.894), low physical activity (OR, 0.552; 95%CI, 0.408 to 0.746), systolic blood pressure (OR, 0.982; 95%CI, 0.971 to 0.992), and social support (OR, 0.978; 95%CI, 0.963 to 0.993). In patients without depression at baseline, the incidence of depression after one year of follow-up was 1.20% (95%CI, 1.11 to 2.81).

Conclusions: Depression is very prevalent among patients with T2DM and is associated with several key diabetes-related outcomes. Our results suggest that previous mental status, self reported health status, gender and several diabetes-related complications are associated with differences in the degree of depression. These findings should alert practitioners to the importance of detecting depression in patients with T2DM.

### Strengths and limitations of this study

- Time between both telephone interviews for depression screening was too short (12 months), making it difficult to compare cumulative incidence rates with those other studies.
- We preferred to exclude antidepressant agents from our combined variable for depression, because the antidepressants can be prescribed for diseases other than depression (i.e., sleeping disorders, migraine, neuropathic pain, obsessive-compulsive disorders, anxiety/panic disorder). In order to compare our findings with multivariable models from different studies, we may have adjusted variables unnecessary. However, fortunately, over-adjustment was avoided (changes >20% between crude and adjusted SE, data not shown).
- The strengths of our study include its prospective design, which ensured that measurement of risk factors preceded the development of depression, and the assessment of information on potentially confounding variables, which reduces potential selection and confusion biases.
- We also used an assessment of depression based on MINI 5.0, which was completed with the patient's general practitioner clinical who used his/her clinical judgment to determine whether the patient's symptoms and signs were compatible with a depressive disorder. Therefore, self-reported diagnosis was avoided.

**Keywords:** Depression; Diabetes Mellitus, Type 2; Self-Care; Cohort Studies.



## 1. Introduction

Currently, an estimated 8%-9% adults worldwide have type 2 diabetes mellitus (T2DM), and a substantial increase in prevalence over time has been observed (1). The prevalence of T2DM in the Spanish population is even higher (13.8%) (2).

Previous studies have shown that coexistence of mental disorders such as depression is considerably more frequent in people with T2DM than in the overall population (3) (4), with an prevalence ranging from 15% to 24% (5) and an incidence rate of depression during the first year after initiation of oral antidiabetic treatment of 12.61 per 1000 person-years (6). The coexistence of diabetes and mental disorders has a strong impact on the patient, with an increased risk of cardiovascular disease, all-cause mortality (7) and cardiovascular mortality (7), especially as a result of cardiovascular complications of T2DM (8). In addition, patients with diabetes and mental disorders show poorer compliance with treatment recommendations than T2DM patients without depression, and more frequently have cardiovascular risk factors such as smoking, obesity, sedentary lifestyle, and poor glycemic control (9), which can impact on their health-related quality of life (10).

To our knowledge, research on common mental disorders affecting patients with T2DM is scarce in Spain (11) (12) (13). In a recent cross-sectional study on patients with T2DM, Alonso-Morán et al. (14) reported that 9.8% of patients were diagnosed with depression (5.2% for males and 15.1% for females), and in a study by Nicolau et al. (12), 27.2% of patients had symptoms of depression. However, in these studies, data collection was often based on health surveys (11) (15) or self-reported scales (12,16), which yielded heterogeneous data. Thus, mental disorders have not been assessed using a clinical interview as the "gold standard".

The aims of the present study were to estimate the prevalence of depression in patients diagnosed with T2DM, and to identify sociodemographic, clinical, and psychological factors associated with the occurrence of depression in this population. Additionally, we examine the one-year incidence rate of depression among T2DM patients.

## 2. Material and Methods

### 2.1. Design and participants

The Madrid Diabetes Study (MADIABETES Study), is a large prospective cohort study of various clinical and psychosocial aspects of outpatients with T2DM living in the metropolitan area of Madrid, Spain. The first recruitment drive was in 2007 and enrolled 3,443 T2DM outpatients from the 56 participating primary health care centers (PHCC). Patients were selected by simple random sampling by participating general practitioners (n= 131) based on the list of patients with a diagnosis of T2DM in their computerized clinical records (CCR). A more complete description of this methodology can be found elsewhere (17).

Reasons for not continuing till completion were leaving the participating PHCC, death or drop-out. Furthermore, the dynamic character of MADIABETES cohort, i.e. new participants could enter over time, helped prevent loss of the study population. Therefore, at the end of 2010, a second recruitment drive involving 41 PHCC included 727 new patients.

The inclusion criteria were: a diagnosis of T2DM in the CCR (code T90 of the International Classification of Primary Care [ICPC-2]) (18), age  $\geq 30$  years, visit to a PHCC at least twice in the previous year, and agreement to take part in the study and provided written informed consent. Patients were excluded for the following reasons: diagnosis of gestational diabetes mellitus, being in an institution, inability to understand Spanish, severe chronic diseases or significant physical or psychological disabilities that might invalidate informed consent or interviews (according to clinical judgment), legal incompetence or legal guardianship, and participation in clinical trials.

For the purpose of evaluating the prevalence of depression (DIAbetes and DEpression in MADrid-DIADEMA Study), we included those patients who participated in the interview process conducted between January 1<sup>st</sup> 2011 and 31<sup>th</sup> December 2011. Furthermore, to estimate the annual incidence of depression, the data from the second interview were included. The original protocol of the study was published in advance (19). Therefore, for the

1  
2  
3 main variable the MADIABETES cohort included a total of 2,955 patients (see the flow diagram  
4  
5 in Figure 1).

## 6 7 2.2. Patient and Public Involvement

8  
9 Major depression is prevalent among patient with diabetes, especially older adults, and is a  
10  
11 risk factor for self-care, complications and death. Therefore, our research question focuses on  
12  
13 screening for depressive symptoms in all patients with diabetes, with particular emphasis on  
14  
15 those with a self-reported history of depression. We use age-appropriate depression screening  
16  
17 measures and are aware that further evaluation will be necessary for individuals with a  
18  
19 positive result. Treatment is prescribed accordingly.

20  
21 Patients were not involved in the design, recruitment or conduct of the study. We report our  
22  
23 results annually at specific meeting, to which we invited the participating general practitioners  
24  
25 and all the patients included in the MADIABETES Cohort.

## 26 27 2.3. Source of data

28  
29 To achieve the goal of the MADIABETES Study, data began to be collected in 2007 (baseline  
30  
31 visit) and then annually during the follow-up period (since 2008). Four data collection  
32  
33 strategies were combined.

34  
35 First, data concerning disease episodes (coded in ICPC-2) (18), prescription of medication  
36  
37 (coded according to the Anatomical Therapeutic Chemical classification system), laboratory  
38  
39 results, anthropometric variables, and use of care facilities were obtained from the CCR. The  
40  
41 CCR for primary health care in the Madrid Health Service was administered by OMI-AP©  
42  
43 software. CCR registration is continuously updated in the PHCC under routine clinical practice  
44  
45 conditions, and once a year, data are transferred to our central database.

46  
47 Second, the general practitioner of each participating patient collected information about  
48  
49 morbidity and mortality, under routine clinical practice conditions using an electronic case  
50  
51 report form (hosted on the website [www.madiabetes.com](http://www.madiabetes.com)). All general practitioners received  
52  
53  
54  
55  
56  
57  
58  
59  
60

1  
2  
3 training to standardize their knowledge of project objectives, data collection techniques and  
4  
5 field work procedures.

6  
7 Third, from 2011 onward, all patients were invited each year to undergo an interview to  
8  
9 provide sociodemographic data, lifestyle data, determinants of health, and psychosocial  
10  
11 characteristics. Data were collected using a previously standardized protocol through a  
12  
13 telephone interview with a clinical psychologist trained in the evaluation procedure of the  
14  
15 study. Lastly, the vital status of the patients was ascertained from two mortality records: *Índice*  
16  
17 *Nacional de Defunciones*  
18  
19 ([https://www.msssi.gob.es/estadEstudios/estadisticas/estadisticas/estMinisterio/IND\\_TipoDif](https://www.msssi.gob.es/estadEstudios/estadisticas/estadisticas/estMinisterio/IND_TipoDif)  
20  
21 [usion.htm](http://www.ine.es)) and *Instituto Nacional de Estadística* (<http://www.ine.es>). The latter indicates the  
22  
23 underlying cause of death recorded on the death certificates, which is coded according to the  
24  
25 International Classification of Diseases, Tenth Revision (20).  
26  
27  
28  
29

#### 30 2.4. Variables

31  
32 The primary outcome variable was depression. The diagnosis of depression was considered a  
33  
34 combined variable, as suggested by other authors (21), consisting of a diagnosis based on the  
35  
36 module of major depressive disorder of the International Neuro-psychiatric Interview (MINI  
37  
38 5.0.0) (22). The interview was applied by a trained psychologist, and the diagnosis was made  
39  
40 with the patient's general practitioner clinical who used his/her clinical judgment to determine  
41  
42 whether the patient's symptoms and signs were compatible with a depressive disorder.  
43  
44

45 The MINI is a short and efficient diagnostic interview to diagnose mental disorders, which was  
46  
47 used in its Spanish version (23).  
48

49 The other *psychosocial variables* evaluated included the following:

50  
51 - A personal history of psychiatric disorder if the patient reported a positive response to the  
52  
53 question: "Has a clinician ever diagnosed you as having any psychiatric disorder?. Alternatively,  
54  
55  
56  
57  
58  
59  
60

1  
2  
3 patients could have been diagnosed with a psychiatric disorder before the last 12-month  
4 interval, as coded in the CCR.

5  
6  
7 - A family history of psychiatric disorder was registered if the patient reported a positive  
8 response to the question: "Has any family member (first-degree relatives) ever been diagnosed  
9 with a psychiatric disorder?"  
10  
11

12  
13 - Anxiety disorder was defined based on the module of generalized anxiety disorder of the  
14 MINI (23) and according to clinical judgment.  
15

16  
17 - Social support, such as network size, was assessed based on the question: "About how many  
18 close friends and close relatives do you have (people you feel at ease with and can talk to  
19 about what is on your mind)?" which corresponds to the first item of the Medical Outcomes  
20 Study-Social Support Survey (MOS-SSS) (24).  
21  
22

23  
24 - Health-related quality of life was measured using the SF-12 questionnaire, a composite of 12  
25 items that assess eight dimensions of health: physical functioning, role-physical, general  
26 health, bodily pain, vitality, social functioning, role-emotional, and mental health (25). The SF-  
27 12 measures various aspects of physical and mental health, from which physical and mental  
28 summary scores are computed using the scores of 12 questions. The score ranges from 0 to  
29 100, where a zero score indicates the lowest level of health and 100 indicates the highest level  
30 of health. Both Physical and Mental Health Composite Scales combine the 12 items in such a  
31 way that they compare with a national norm (mean score of 50.0 and a standard deviation of  
32 10.0).  
33  
34

35  
36 -Insomnia was assessed using the Spanish version of the eight-item Athens Insomnia Scale  
37 (AIS-8) (26) which is a self-reported questionnaire designed to measure the severity of  
38 insomnia based on the diagnostic criteria of the ICD-10 Classification of Mental and  
39 Behavioural Disorders.  
40  
41

42  
43  
44  
45  
46  
47  
48  
49  
50  
51  
52  
53  
54  
55  
56  
57  
58  
59  
60  
*Sociodemographic variables* included age (date of birth), gender, nationality, length of residence in Spain, marital status (single, unmarried partners, married, divorced, widowed),

1  
2  
3 educational level (no studies, primary, high school, university), and employment status  
4  
5 (employed, unemployed, retired, housewife and other).

6  
7 *Medical variables* included the following:

- 8  
9 – Comorbidity variables: hypertension, defined as systolic blood pressure  $\geq 140$  mmHg,  
10  
11 and/or diastolic blood pressure  $\geq 90$  mmHg; heart failure, which was defined as symptoms  
12  
13 of dyspnea or edema associated with bilateral rales, elevated venous pressure, or  
14  
15 interstitial or alveolar edema on chest X-ray, and required the addition of diuretics or  
16  
17 inotropic medications; myocardial infarction, defined as a history of chest pain/discomfort  
18  
19 associated with elevation of ST segment in electrocardiographic in two or more contiguous  
20  
21 leads and elevation of myocardial enzymes; stroke, defined as a rapidly developing clinical  
22  
23 syndrome of focal disturbance of cerebral function that lasted more than 24 hours;  
24  
25 peripheral artery disease, defined as a symptomatic and documented obstruction of the  
26  
27 distal arteries of the leg; low limb amputations, defined as the complete loss in the  
28  
29 transverse anatomical plane of any part of the lower limb; erectile dysfunction, defined as  
30  
31 the consistent inability to achieve or maintain an erection sufficient for satisfactory sexual  
32  
33 performance; retinopathy, defined as a documented diagnosis by an ophthalmologist of  
34  
35 non-proliferative retinopathy, proliferative retinopathy or macular edema; nephropathy,  
36  
37 defined as a history of renal disease due to diabetes mellitus or requiring dialysis;  
38  
39 neuropathy, defined as diminished or lack of perception of touch or pain stimuli and loss of  
40  
41 joint position sense and vibration sense, and renal failure, defined as an estimated  
42  
43 glomerular filtration rate below  $30 \text{ mL}/1.73 \text{ m}^2$ . Cardiovascular disease (CVD) was defined  
44  
45 as one or more of the following: myocardial infarction, stroke or peripheral vascular  
46  
47 disease.  
48  
49  
50  
51 – Other clinical variables: duration of diabetes (years) and family history of diabetes (in the  
52  
53 first-degree relatives).  
54  
55  
56  
57  
58  
59  
60

- 1  
2  
3 – Anthropometric variables: height, weight, body mass index (BMI), hip circumference, waist  
4 circumference, systolic blood pressure, and diastolic blood pressure.  
5  
6  
7 – Laboratory results: albuminuria, creatinine, lipid profile, HbA1c and glucose.  
8  
9 – Personal health habits: 1. Smoking (never, former or current smoker). 2. Physical activity  
10 level which was measured using a short questionnaire based on the FAO/WHO/UNU  
11 Expert Consultation Report Energy and Protein Requirements (Geneva, 1985) and  
12 administered individually at a medical examination. The answers were coded from 1 to 3,  
13 with 1 representing inactivity or sedentary activity (remaining seated or at rest most of the  
14 time, sleeping, resting, sitting or standing, walking on flat ground, light housework, playing  
15 cards, sewing, cooking, studying, driving, typing, office duties, etc.), 2 representing low  
16 activity (walking at 5 km/h, heavy housework [cleaning windows, etc.], jobs such as  
17 carpenter, construction workers [except hard work], chemical industry, electrical,  
18 mechanized agricultural tasks, playing golf, child care, etc.), and 3, moderate or vigorous  
19 activity (non-mechanized agricultural tasks, mining, forestry, digging, chopping wood, hand  
20 mowing, climbing, mountaineering, playing football, tennis, jogging, dancing, skiing, etc.).  
21  
22 3. Drinking (0.1 through 4.9, or 5.0 or more g/d of alcohol).  
23  
24 – Treatment: statins,  $\beta$ -blockers, angiotensin-converting enzyme inhibitors, angiotensin  
25 receptor blockers, calcium channel blockers, diuretics, antiplatelet drugs, antidiabetics,  
26 antidepressant drugs and anxiolytics.  
27  
28  
29  
30  
31  
32  
33  
34  
35  
36  
37  
38  
39  
40  
41  
42  
43  
44

#### 45 2.5. Statistical analysis

46 Quantitative variables were expressed as mean and standard deviation; qualitative variables  
47 were expressed as frequency distribution. Normally distributed continuous variables were  
48 compared using the *t* test, non-normally distributed variables were compared using the Mann-  
49 Whitney test, and categorical variables were compared using the chi-square test. Effect sizes  
50  
51  
52  
53  
54  
55  
56  
57  
58  
59  
60

1  
2  
3 were calculated using Cohen's d for continuous measures and Cramer's V for categorical  
4  
5 variables.

6  
7 Given the hierarchical structure of our data, we used a logistic regression analysis with two  
8  
9 levels: level 1, patients, and level 2, health centers (our sampling unit). However, in the initial  
10  
11 step (null model), the variation in the prevalence of depression between centers was not  
12  
13 significant ( $\sigma^2_{u0} = 0.02$ , SE = 0.02, p = 0.115), with an intraclass correlation coefficient of  
14  
15 0.007; therefore, we did not consider it necessary to adjust for a hierarchical model.

16  
17 Explanatory multivariable logistic regressions models were constructed to identify variables  
18  
19 that were independently associated with depression (prevalent). We report adjusted odds  
20  
21 ratios (ORs) with their respective 95% confidence intervals (95%CI). Variables that were  
22  
23 statistically significant in the bivariate analysis and those shown to be predictors in previous  
24  
25 studies were included in the multivariate analysis. We analyzed the possibility of over-  
26  
27 adjustment, defined when after adjusting on the covariate it altered the adjusted OR of 10%–  
28  
29 20% with a concomitant change in the standard error (SE) higher than 20%.

30  
31 The annual incidence rate of depression was calculated by the standard method as follows:  
32  
33 number of new cases of depression over a period (year 2011) / population at risk of developing  
34  
35 the disease at the beginning of the period.

36  
37 In all cases, the accepted level of significance was 0.05 or less, with a 95%CI. Data were  
38  
39 processed using the Statistical Package for the Social Sciences (SPSS for windows, version 21.0;  
40  
41 IBM Corp, Armonk, New York, USA).

#### 42 43 44 45 46 47 2.6. Ethical aspects

48  
49 The study was approved by the Institutional Review Board of Ramón y Cajal Hospital (Madrid)  
50  
51 and conducted in accordance with the principles of the Declaration of Helsinki. All patients  
52  
53 gave their written informed consent to participate in the study.  
54  
55  
56  
57  
58  
59  
60



### 3. Results

#### 3.1. Characteristics of the study population and prevalence of depression

A total of 3,443 patients were included in the study at the first recruitment drive (January 2007). Of these 3,217 were alive before the start of the survey (January 2013), and 2,228 agreed to the interview (participation rate: 69.3%). At the second recruitment, 727 patients agreed to participate (December 2010). Therefore, for the main objective of this study, the sample consisted of 2,955 people; 48.1% were women and the mean age was 70.2 years (SD 10.6).

Depression was prevalent in 20.03% (n=592; 95%CI, 18.6 to 21.5) Table 1 shows the characteristics of the sample, stratified by depression status.

Compared with patients without depression, people with depression were more likely to be female ( $p<0.001$ ), older ( $p=0.017$ ), and widowed or divorced ( $p<0.001$ ). They also, had a lower educational level ( $p<0.001$ ), were less frequently classified as employed ( $p<0.001$ ), and had been taking more intense diabetes treatment for longer ( $p<0.001$ ). Furthermore, patients with depression had higher BMIs ( $p<0.001$ ), were lower consumers of alcohol ( $p<0.001$ ), and had higher rates of never smoking ( $p<0.001$ ), sedentary lifestyle ( $p<0.001$ ), neuropathy ( $p<0.001$ ), and renal failure ( $p=0.012$ ). Anxiety was recorded in 14.8% of the sample (n= 438; 95%CI, 13.5 to 16.1). Coexistence of depression and anxiety was recorded in up to 8.6% (n=255) of the patients.

In addition, patients with depression more frequently had previous episodes of depression ( $p<0.001$ ) and anxiety ( $p<0.001$ ), and fair or poor self-reported health status ( $p<0.001$ ) than patients without these disorders. No significant differences were observed between patients with depression and psychologically healthy subjects in the following: family history of diabetes, level of HbA1c, triglycerides values, nephropathy, and retinopathy.

**Table 1. Baseline characteristics of the sample, with and without depression.**

|                                                   | TOTAL<br>(n=2,955) | With depression<br>(n=592) | Without depression<br>(n=2,363) | p value | Effect<br>size*    |
|---------------------------------------------------|--------------------|----------------------------|---------------------------------|---------|--------------------|
| <b>Sociodemographic variables</b>                 |                    |                            |                                 |         |                    |
| Gender (female); % (n)                            | 48.1 (1,421)       | 67.7 (401)                 | 43.02 (1,020)                   | <0.001  | 0.197 <sup>†</sup> |
| Age (years); mean (SD)                            | 70.2 (10.6)        | 71.1 (10.3)                | 69.9 (10.7)                     | 0.017   | 0.110 <sup>†</sup> |
| Country of origin (foreign-born); % (n)           | 2.4 (70)           | 2.9 (17)                   | 2.2 (53)                        | 0.368   | 0.017 <sup>†</sup> |
| Marital status; % (n)                             |                    |                            |                                 | <0.001  | 0.123 <sup>†</sup> |
| Single without partner                            | 4.6 (136)          | 2.7 (16)                   | 5.1 (120)                       |         |                    |
| Married or with partner                           | 70.4 (2,077)       | 62 (366)                   | 72.5 (1,711)                    |         |                    |
| Divorced                                          | 4.2 (124)          | 5.9 (35)                   | 3.8 (89)                        |         |                    |
| Widowed                                           | 20.8 (614)         | 29.3 (173)                 | 18.7 (441)                      |         |                    |
| Educational level; % (n)                          |                    |                            |                                 | <0.001  | 0.081 <sup>†</sup> |
| Not completed                                     | 20.9 (613)         | 25.7 (152)                 | 19.5 (461)                      |         |                    |
| Primary                                           | 46.7 (1,367)       | 48.6 (288)                 | 46.7 (1,104)                    |         |                    |
| Secondary                                         | 19.7 (576)         | 16.4 (97)                  | 20.3 (479)                      |         |                    |
| University                                        | 12.8 (374)         | 9.3 (55)                   | 13.5 (319)                      |         |                    |
| Employment status; n (%)                          |                    |                            |                                 | <0.001  | 0.084 <sup>†</sup> |
| Employed                                          | 15.7 (459)         | 9.5 (56)                   | 17 (403)                        |         |                    |
| <b>Variables related to diabetes</b>              |                    |                            |                                 |         |                    |
| Duration of diabetes (years); mean (SD)           | 15.4 (10.2)        | 16.5 (10.6)                | 15.06 (10)                      | 0.002   | 0.143 <sup>†</sup> |
| Family history of diabetes (yes); % (n)           | 61.7 (1,813)       | 64.5 (382)                 | 61.3 (1,448)                    | 0.145   | 0.027 <sup>†</sup> |
| Type of diabetes treatment; % (n)                 |                    |                            |                                 | <0.001  | 0.121 <sup>†</sup> |
| Only diet                                         | 8.4 (248)          | 7.4 (44)                   | 8.6 (204)                       |         |                    |
| Oral antidiabetic agents                          | 53.2 (1,572)       | 47.3 (280)                 | 54.7 (1,292)                    |         |                    |
| Insulin                                           | 5.4 (159)          | 6.9 (41)                   | 5 (118)                         |         |                    |
| Oral antidiabetic agents + insulin                | 16.9 (498)         | 25.2 (149)                 | 14.8 (349)                      |         |                    |
| Not specified                                     | 16.2 (478)         | 13.2 (78)                  | 16.9 (400)                      |         |                    |
| <b>Lifestyle and self-care</b>                    |                    |                            |                                 |         |                    |
| Smoking habit; % (n)                              |                    |                            |                                 | <0.001  | 0.127 <sup>†</sup> |
| Never smoker                                      | 46 (1,360)         | 58.6 (347)                 | 42.9 (1,013)                    |         |                    |
| Ex-smoker                                         | 42.6 (1,259)       | 32.1 (190)                 | 45.2 (1,069)                    |         |                    |
| Smoker                                            | 11.4 (336)         | 9.3 (55)                   | 11.9 (281)                      |         |                    |
| Current regular alcohol use; % (n)                | 883 (33.6)         | 22 (111)                   | 36.4 (772)                      | <0.001  | 0.120 <sup>†</sup> |
| Physical activity; % (n)                          |                    |                            |                                 | <0.001  | 0.117 <sup>†</sup> |
| Sedentary                                         | 11.3 (333)         | 18.4 (109)                 | 9.5 (224)                       |         |                    |
| Low                                               | 81.5 (2,408)       | 76.5 (453)                 | 82.7 (1,955)                    |         |                    |
| Moderate-vigorous                                 | 7.2 (214)          | 5.1 (30)                   | 7.8 (184)                       |         |                    |
| <b>Clinical risk factors</b>                      |                    |                            |                                 |         |                    |
| BMI (kg/m <sup>2</sup> ); mean (SD)               | 31.1 (5.6)         | 32.4 (6.4)                 | 31.2 (5.8)                      | <0.001  | 0.196 <sup>†</sup> |
| Systolic blood pressure (mmHg); mean (SD)         | 131.5 (12.6)       | 129.3 (12.6)               | 131.9 (11.9)                    | <0.001  | 0.208 <sup>†</sup> |
| Diastolic blood pressure (mmHg); mean (SD)        | 73.9 (7.5)         | 73.3 (7.6)                 | 74.2 (7.4)                      | <0.001  | 0.120 <sup>†</sup> |
| <b>Biochemical risk factors</b>                   |                    |                            |                                 |         |                    |
| HbA1c (%); mean (SD)                              | 7.1 (1.1)          | 7.1 (1.2)                  | 7.3 (1.5)                       | 0.703   | 0.110 <sup>†</sup> |
| Triglycerides; mean (SD)                          | 142.4 (87.6)       | 148.9 (89.7)               | 140.7 (86.9)                    | 0.070   | 0.092 <sup>†</sup> |
| Cholesterol; mean (SD)                            | 175.7 (33.9)       | 181.1 (37.1)               | 174.3 (32.9)                    | <0.001  | 0.194 <sup>†</sup> |
| LDL-cholesterol; mean (SD)                        | 99.2 (27.3)        | 101.6 (29.9)               | 98.3 (27.1)                     | 0.064   | 0.115 <sup>†</sup> |
| HDL-cholesterol; mean (SD)                        | 49.5 (13.2)        | 50.6 (12.9)                | 49.1 (13.3)                     | 0.032   | 0.114 <sup>†</sup> |
| <b>Complications and comorbidities</b>            |                    |                            |                                 |         |                    |
| Cardiovascular event; % (n)                       | 29.7 (1,240)       | 31.9 (212)                 | 29.3 (1,028)                    | 0.178   | 0.021 <sup>†</sup> |
| Heart failure; % (n)                              | 11.5 (480)         | 13.7 (91)                  | 11.1 (389)                      | 0.053   | 0.030 <sup>†</sup> |
| Lower limb amputation; % (n)                      | 1.4 (60)           | 1.8 (12)                   | 1.4 (48)                        | 0.385   | 0.013 <sup>†</sup> |
| Nephropathy; % (n)                                | 13.5 (400)         | 16.2 (96)                  | 12.9 (304)                      | 0.033   | 0.039 <sup>†</sup> |
| Neuropathy; % (n)                                 | 10.1 (299)         | 16.7 (99)                  | 8.5 (200)                       | <0.001  | 0.111 <sup>†</sup> |
| Retinopathy; % (n)                                | 15 (442)           | 15.7 (93)                  | 14.8 (349)                      | 0.566   | 0.011 <sup>†</sup> |
| Renal failure; % (n)                              | 14.3 (424)         | 17.6 (104)                 | 13.5 (320)                      | 0.012   | 0.046 <sup>†</sup> |
| <b>Psychosocial variables</b>                     |                    |                            |                                 |         |                    |
| Family history of depression (Yes); % (n)         | 197 (6.7)          | 10.6 (63)                  | 5.7 (134)                       | <0.001  | 0.080 <sup>†</sup> |
| Personal history of depression (Yes); % (n)       | 557 (18.8)         | 48.6 (288)                 | 11.4 (269)                      | <0.001  | 0.381 <sup>†</sup> |
| Self-reported health status (Fair or poor); % (n) | 34.3 (992)         | 47 (269)                   | 31.1 (723)                      | <0.001  | 0.133 <sup>†</sup> |
| Physical quality of life; mean (SD)               | 40.1 (11.4)        | 35.3 (12.5)                | 41.5 (10.7)                     | <0.001  | 0.533 <sup>†</sup> |
| Mental quality of life; mean (SD)                 | 47.4 (10.9)        | 41.3 (12.5)                | 49.1 (9.7)                      | <0.001  | 0.697 <sup>†</sup> |
| Social support (network size); mean (SD)          | 10.2 (8.3)         | 8.5 (7.3)                  | 10.6 (8.5)                      | <0.001  | 0.217 <sup>†</sup> |
| Sleep (AIS); mean (SD)                            | 2.6 (3.7)          | 5.3 (5.2)                  | 2 (2.9)                         | <0.001  | 0.783 <sup>†</sup> |

BMI, body mass index; AIS, Athens Insomnia Scale; HbA1c, glycated haemoglobin; <sup>†</sup>Cramer's V; <sup>‡</sup>Cohen's d; \*0.2 is the recommended minimum effect size; Cardiovascular event, includes nonfatal myocardial infarction, stroke, and peripheral artery disease.

### 3.2. Factors associated with prevalent depression

Table 2 shows the variables associated with depression after fully adjustment for potential confounding factors. The variable most strongly associated with depression was previous personal history of depression (OR, 6.482; 95%CI, 5.138 to 8.178;  $p \leq 0.001$ ), followed by neuropathy (OR, 1.951; 95%CI, 1.423 to 2.674;  $p \leq 0.001$ ), treatment with oral antidiabetic agents plus insulin (OR, 1.802; 95%CI, 1.364 to 2.380;  $p \leq 0.001$ ), fair or poor self reported health status (OR, 1.509; 95%CI, 1.209 to 1.882;  $p \leq 0.001$ ), mental health score (SF-12) below the mean (OR, 1.423; 95%CI, 1.054 to 1.921;  $P=0.021$ ),  $\leq$ female gender (OR, 1.333; 95%CI, 1.009 to 1.761;  $p=0.043$ ), and blood cholesterol level (OR, 1.005; 95%CI, 1.002 to 1.009;  $p=0.002$ ).

On the other hand, the variables inversely associated with depression were: being employed (OR, 0.595; 95%CI, 0.397 to 0.894;  $p=0.012$ ), low physical activity (OR, 0.552; 95%CI, 0.408 to 0.746;  $p < 0.001$ ), systolic blood pressure (OR, 0.982; 95%CI, 0.971 to 0.992;  $p=0.001$ ), current alcohol use (OR, 0.726; 95%CI, 0.552 to 0.954) and social support (network size) (OR, 0.978; 95%CI, 0.962 to 0.993;  $p=0.005$ ).

**Table 2. Factors associated with prevalence of depression (logistic regression analysis)**

(Hosmer-Lemeshow= 5.132; df=5;  $p=0.743$ )

|                                                      |                                    | OR    | 95% CI      | P-value |
|------------------------------------------------------|------------------------------------|-------|-------------|---------|
| <b>Gender</b>                                        |                                    |       |             |         |
|                                                      | Male                               | 1     |             |         |
|                                                      | Female                             | 1.333 | 1.009-1.761 | 0.043   |
| <b>Age</b>                                           |                                    |       |             |         |
|                                                      | <65 years                          | 1     |             |         |
|                                                      | ≥65 years                          | 0.858 | 0.626-1.175 | 0.339   |
| <b>Duration of T2DM (y)[per unit of increment]</b>   |                                    |       |             |         |
|                                                      |                                    | 1.006 | 0.995-1.016 | 0.303   |
| <b>Educational level</b>                             |                                    |       |             |         |
|                                                      | University                         | 1     |             |         |
|                                                      | Secondary                          | 0.980 | 0.644-1.493 | 0.926   |
|                                                      | Primary                            | 1.060 | 0.729-1.543 | 0.759   |
|                                                      | Not completed                      | 1.118 | 0.735-1.699 | 0.602   |
| <b>Country of origin</b>                             |                                    |       |             |         |
|                                                      | Spain                              | 1     |             |         |
|                                                      | Other                              | 1.433 | 0.738-2.784 | 0.288   |
| <b>Employment status</b>                             |                                    |       |             |         |
|                                                      | Not working                        | 1     |             |         |
|                                                      | Working                            | 0.595 | 0.397-0.894 | 0.012   |
| <b>Smoking</b>                                       |                                    |       |             |         |
|                                                      | Never smoker                       | 1     |             |         |
|                                                      | Former smoker                      | 0.854 | 0.652-1.119 | 0.252   |
|                                                      | Current smoker                     | 0.874 | 0.585-1.306 | 0.510   |
| <b>Family history of DM</b>                          |                                    |       |             |         |
|                                                      | No                                 | 1     |             |         |
|                                                      | Yes                                | 1.109 | 0.888-1.385 | 0.362   |
| <b>Current Alcohol use</b>                           |                                    |       |             |         |
|                                                      | No                                 | 1     |             |         |
|                                                      | Yes                                | 0.726 | 0.552-0.954 | 0.022   |
| <b>Physical activity</b>                             |                                    |       |             |         |
|                                                      | Sedentary                          | 1     |             |         |
|                                                      | Low                                | 0.552 | 0.408-0.746 | <0.001  |
|                                                      | Moderate-Vigorous                  | 0.636 | 0.377-1.074 | 0.091   |
| <b>Diabetes treatment</b>                            |                                    |       |             |         |
|                                                      | Oral antidiabetic agents           | 1     |             |         |
|                                                      | Oral antidiabetic agents + insulin | 1.802 | 1.364-2.380 | <0.001  |
|                                                      | Insulin                            | 1.476 | 0.938-2.323 | 0.092   |
|                                                      | Diet                               | 0.932 | 0.623-1.394 | 0.731   |
|                                                      | Unknown                            | 0.771 | 0.560-1.061 | 0.110   |
| <b>BMI (kg/m<sup>2</sup>)[per unit of increment]</b> |                                    |       |             |         |
|                                                      |                                    | 1.012 | 0.992-1.032 | 0.249   |
| <b>Systolic BP (mmHg)[per unit of increment]</b>     |                                    |       |             |         |
|                                                      |                                    | 0.982 | 0.971-0.992 | 0.001   |
| <b>Diastolic BP (mmHg)[per unit of increment]</b>    |                                    |       |             |         |
|                                                      |                                    | 0.992 | 0.974-1.009 | 0.358   |
| <b>Cholesterol (mg/dl) [per unit of increment]</b>   |                                    |       |             |         |
|                                                      |                                    | 1.005 | 1.002-1.009 | 0.002   |
| <b>Neuropathy</b>                                    |                                    |       |             |         |
|                                                      | No                                 | 1     |             |         |
|                                                      | Yes                                | 1.951 | 1.423-2.674 | <0.001  |
| <b>Nephropathy</b>                                   |                                    |       |             |         |
|                                                      | No                                 | 1     |             |         |

|                                                             |                          |       |             |        |
|-------------------------------------------------------------|--------------------------|-------|-------------|--------|
|                                                             | Yes                      | 1.077 | 0.782-1.483 | 0.649  |
| <b>Retinopathy</b>                                          |                          |       |             |        |
|                                                             | No                       | 1     |             |        |
|                                                             | Yes                      | 0.784 | 0.578-1.065 | 0.119  |
| <b>Renal failure</b>                                        |                          |       |             |        |
|                                                             | No                       | 1     |             |        |
|                                                             | Yes                      | 1.220 | 0.892-1.670 | 0.214  |
| <b>Self-reported health status</b>                          |                          |       |             |        |
|                                                             | Excellent-very good-good | 1     |             |        |
|                                                             | Fair-poor                | 1.509 | 1.209-1.882 | <0.001 |
| <b>Family history of depression</b>                         |                          |       |             |        |
|                                                             | No                       | 1     |             |        |
|                                                             | Yes                      | 1.419 | 0.975-2.066 | 0.067  |
| <b>Personal history of depression</b>                       |                          |       |             |        |
|                                                             | No                       | 1     |             |        |
|                                                             | Yes                      | 6.482 | 5.138-8.178 | <0.001 |
| <b>Social support (network size)[per unit of increment]</b> |                          |       |             |        |
|                                                             |                          | 0.978 | 0.962-0.993 | 0.005  |
| <b>Physical health score (SF-12)</b>                        |                          |       |             |        |
|                                                             | Score $\geq$ mean        | 1     |             |        |
|                                                             | Score < mean             | 1.243 | 0.910-1.699 | 0.171  |
| <b>Mental health score (SF-12)</b>                          |                          |       |             |        |
|                                                             | Score $\geq$ mean        | 1     |             |        |
|                                                             | Score < mean             | 1.423 | 1.054-1.921 | 0.021  |
| <b>History of cancer</b>                                    |                          |       |             |        |
|                                                             | No                       | 1     |             |        |
|                                                             | Yes                      | 0.961 | 0.716-1.290 | 0.792  |
| <b>Cardiovascular disease</b>                               |                          |       |             |        |
|                                                             | No                       | 1     |             |        |
|                                                             | Yes                      | 1.156 | 0.901-1.482 | 0.255  |
| <b>Heart failure</b>                                        |                          |       |             |        |
|                                                             | No                       | 1     |             |        |
|                                                             | Yes                      | 1.297 | 0.910-1.849 | 0.150  |
| <b>Lower limb amputation</b>                                |                          |       |             |        |
|                                                             | No                       | 1     |             |        |
|                                                             | Yes                      | 1.765 | 0.798-3.904 | 0.160  |

### 3.3. Incidence of depression and predictive factors

During a median 12 months follow-up, 28 patients, without depression at baseline, developed an incident episode of depression, that is an annual incidence of 1.2% (95%CI, 1.11 to 2.81). There were differences by gender: 0.6% (95%CI, 0.13 to 1.07) in men and 2% (95%CI, 1.11 to 2.81) in women ( $p=0.002$ ). Female gender was the variable most strongly associated with incidence of depression (OR, 2.620; 95%CI, 1.129 to 6.083);  $p=0.025$ ). Other variables inversely associated with incidence of depression were: low physical activity (OR, 0.334; 95%CI, 0.136 to 0.818;  $p=0.018$ ), diastolic blood pressure (per each unit of increment) (OR, 0.937; 95%CI, 0.887 to 0.988;  $p=0.017$ ), and social support (network size) (OR, 0.875; 95% CI, 0.797 to 0.962;  $p=0.006$ ).

Of the 592 patients initially identified as depressed, 394 (66.66%) had no symptoms or signs of depression after 1-year of follow-up, and 198 (33.33%) persisted with symptoms.

## 4. Discussion

The association between diabetes and depression has been well-known for at least three decades (4). The prevalence of depression in people with T2DM varies widely owing to circumstances such as differences in the methods used to assess depression (clinical interviews, questionnaires, self-report scales, and medical records), sample origin (clinical or outpatient screening), ethnic subgroups, gender composition, and age intervals. Two meta-analyses reported an overall prevalence of depression ranging from 17.6% to 27% (4). We analyzed the prevalence of depression in a cohort of patients with T2DM from the city of Madrid based on a clinical interview completed with prescribing and clinical data from CCR. Depression was prevalent in 20.03% ( $n=592$ ; CI 95%, 18.6 to 21.5) of our sample, a finding that is lower than the 27.2% reported in primary-care settings and a hospital endocrinology department in Mallorca (Spain) using the Beck Depression Inventory as the screening tool (12). These findings are worrying, given the adverse impact of depression on the natural history of

1  
2  
3 T2DM, which takes the form of poor metabolic control (27), non-adherence to treatment  
4 (28,29), and increased risk of vascular complications (8) .

5  
6  
7 Poor social support and negative life events (i.e., adverse socioeconomic circumstances, death  
8 of relatives) have been associated with depression in people with T2DM (30). These two  
9 factors are more frequent in women (31) (32), thus explaining the predominance of depression  
10 among females, as reported by the vast majority of studies (33) (34). However, not all the  
11 studies have confirmed this hypothesis (35).

12  
13  
14  
15  
16  
17 After adjusting for gender and other known risk factors, our findings show that the association  
18 with depression was reduced by 2.2% per unit of increment of network size. Similarly, the  
19 association with depression could be reduced by physical activity, as we found in patients with  
20 low physical activity compared with a sedentary lifestyle (OR, 0.552; 95%CI, 0.408 to  
21 0.746;p≤0.001). However, we did not demonstrate a similar benefit in those who undertake  
22 moderate or vigorous physical activity. This phenomenon could be explained by the fact that  
23 very few had a high level of activity.

24  
25  
26  
27  
28  
29  
30  
31  
32 General practitioners should be encouraged to implement strategies designed to reduce the  
33 risk of depression in patients with T2DM, especially in those at high-risk of depression owing to  
34 exposure to chronic psychosocial stressors (29).

35  
36  
37  
38 We found an inverse association between low physical activity and social support and  
39 depression. While this association does not necessarily imply a causal relationship, it might  
40 encourage the implementation of physical activity programs and the creation of support  
41 groups focused on psychological well-being and detection of depressive symptoms. Some of  
42 these suggestions have proven to be effective and feasible in older populations (36).

43  
44  
45  
46  
47  
48  
49 On the other hand, it is necessary to bear in mind that treatment of depression can be a  
50 prerequisite for good diabetes control because people with diabetes might follow their  
51 treatment plan more easily if their mood is improved first (37).

1  
2  
3 Other predictive factors of depression such as a previous depressive episode or family history  
4 of depression are not modifiable factors for reducing the risk of developing depression.  
5  
6 However, health professionals must be alert to the presence of early symptoms of depression  
7  
8 in order to treat this condition promptly. Indeed, routine screening for psychosocial problems  
9  
10 such as depression is supported in well-conducted cohort studies (38). In this sense, screening  
11  
12 for depression with questionnaires is insufficiently specific and needs to be complemented by  
13  
14 a formal clinical assessment to confirm the diagnosis (37).  
15

16  
17 Being in employment was inversely associated with depression (OR, 0.595;  $p= 0.012$ ), as  
18  
19 shown elsewhere (39). This aspect suggests that going to work might have a protective role  
20  
21 against depression owing to the social support received from co-workers.  
22

23  
24 Of the classic complications of diabetes, neuropathy was the only one significantly associated  
25  
26 with depression (OR, 1.951;  $p\leq 0.001$ ). Nephropathy, renal failure, heart failure, CVD, and lower  
27  
28 limb amputation tended to have a positive association with depression. However, other  
29  
30 studies have shown a significant and consistent association between complications of diabetes  
31  
32 and depressive symptoms (8) As it was logical to suppose, subjects with depression had lower  
33  
34 values in the mental health component score obtained from the SF-12, as reported elsewhere  
35  
36 (40).  
37

38  
39 Consistent with other studies (41,42), we found that participants with depression self-rated  
40  
41 their health status significantly lower than those without depression. Given the known  
42  
43 relationship between fair/poor perceived health status and mortality (43), especially in  
44  
45 patients with chronic diseases (44), it would be advisable for patients with poor self-rated  
46  
47 health to be enrolled in a health coaching program similar to that used in the Royal North  
48  
49 Shore Hospital, Sydney, Australia (45). In this program, patients with diabetes who had the  
50  
51 lowest self-reported health status at baseline improved their rating in the first question of the  
52  
53 Short-Form 36 Quality of Life Instrument (SF-1) from 4.4 to 3.7 ( $P\leq 0.001$ ), and improved their  
54  
55  
56  
57  
58  
59  
60



1  
2  
3 knowledge of diabetes. Their distress levels decreased significantly with respect to baseline  
4  
5 values.

6  
7 Medications for lowering blood sugar (insulin plus oral anti-diabetic agents) were significantly  
8  
9 associated with depression (OR, 1.802;  $p \leq 0.001$ ). Prior studies have highlighted the same  
10  
11 phenomenon: the glucose-lowering therapies that include insulin are strongly associated with  
12  
13 depression (46). Two different factors could explain this association: first, the implementation  
14  
15 of insulin therapy requires painful injections and frequent glucose measurements, thus  
16  
17 increasing stress and favoring the onset of a depressive episode in old age (47); second, since  
18  
19 insulin is usually necessary for situations of poor glycemic control, it could be that non-optimal  
20  
21 control of diabetes leads to worsening of mood, greater stress, and less life-satisfaction.  
22

23  
24 As for the incidence of depression after one year of follow-up, the present study reveals a  
25  
26 value of 1.20% which is similar to that reported in the ZARADEMP Spanish Study (48), but  
27  
28 lower than reported in other countries (5, 49-51). A possible explanation for this result could  
29  
30 be that, compared with other European countries, the greater number of hours of sunlight in  
31  
32 Spain protect against depression (50). In a meta-analysis (51) that evaluated 16 studies to  
33  
34 analyze the relationship between diabetes and depression, the cumulative incidence of  
35  
36 depression among people with diabetes ranged from 11.9%, after two years of follow-up, (52)  
37  
38 to 23.5%, after 5.9 years of follow-up (53). The conclusion of the meta-analysis (54) is that  
39  
40 there is evidence to support the hypothesis that diabetes is a “depressogenic” condition. This  
41  
42 affirmation implies a real public health problem that may be resolved only by a specific  
43  
44 prevention strategy.  
45

#### 46 47 4.1. Conclusions

48  
49 Depression is very prevalent among patients with T2DM and it is associated with several key  
50  
51 diabetes-related outcomes. Our results suggest that previous mental status, self-reported  
52  
53 health status, and some diabetes-related complications are associated with differences in the  
54  
55 degree of depression. We also found sex-related differences with respect to the prevalence of  
56  
57  
58  
59  
60

1  
2  
3 depression. Our study shows that the risk of depression could be reduced by physical activity  
4 and social support. These findings should alert practitioners to the importance of detection of  
5 depression in patients with T2DM, and to the need to reduce the risk of depression with  
6 prevention programs focused on improving the physical activity of the patients and the  
7 creation of support groups. Our findings also suggest that the annual incidence rate of  
8 depression is low and that a high proportion of patients with T2DM who experience  
9 depression achieved full remission after one year of follow-up.  
10  
11  
12  
13  
14  
15  
16  
17  
18

### 19 **Acknowledgements**

20  
21 The authors thank to all health professionals of Primary Health Care of Madrid who have made  
22 its development possible.  
23  
24  
25  
26  
27

### 28 **Contributor Ship Statement**

29  
30 CBL and MASF designed the study and got funding. JCV, PGC, JCAH, RCM and DBV contributed  
31 to select the patients sampling by participating general practitioner, to data collection and  
32 combined the data collection strategies in a single database. FJSR, CBL, PGC and MASF  
33 analysed the data. PGC, MASF, and JMDY wrote the initial draft of the paper. RJG, ALA, CBL and  
34 ECS were involved in further drafting of the paper. All authors participated in interpreting the  
35 data, revising the paper for critically important intellectual content and gave final approval of  
36 the submitted version.  
37  
38  
39  
40  
41  
42  
43  
44  
45  
46

### 47 **Data Sharing Statement**

48 No additional data are available  
49  
50  
51  
52

### 53 **Funding**

This study forms part of research funded by the FIS (Fondo de Investigaciones Sanitarias—Health Research Fund, Instituto de Salud Carlos III) grants no.: PI10/02796, PI12/01806 and PI15/00259 and co-financed by the European Union through the Fondo Europeo de Desarrollo Regional (FEDER, “Una manera de hacer Europa”).

The members of the MADIABETES Group are as follows : AM Sobrado-de Vicente-Tutor; Mar Sanz-Pascual; M Arnalte-Barrera; S Pulido-Fernández; EM Donaire-Jiménez; C Montero-Lizana; M Domínguez-Paniagua; P Serrano-Simarro; R Echegoyen-de Nicolás; P Gil-Díaz; I Cerrada-Somolinos; R Martín-Cano; A Cava-Rosado; T Mesonero-Grandes; E Gómez-Navarro; A Maestro-Martín; A Muñoz-Cildoz; ME Calonge-García; M Martín-Bun; P Carreño-Freire; J Fernández-García; A Morán-Escudero; J Martínez-Irazusta; E Calvo-García; AM Alayeto-Sánchez; C Reyes-Madrideos; MJ Bedoya-Frutos; B López-Sabater; J Innerarity-Martínez; A Rosillo-González; AI Menéndez-Fernández; F Mata-Benjumea; P Vich-Pérez; C Martín-Madrado; MJ Gomara-Martínez; C Bello-González; A Pinilla-Carrasco; M Camarero-Shelly; A Cano-Espin; J Castro Martin; B de Llama-Arauz; A de Miguel-Ballano; MA García-Alonso; JN García-Pascual; MI González-García; C López-Rodríguez; M Miguel-Garzón; MC Montero-García; S Muñoz-Quiros-Aliaga; S Núñez-Palomo; O Olmos-Carrasco; N Pertierra-Galindo; G Reviriego-Jaén; P Rius-Fortea; G Rodríguez-Castro; JM San Vicente-Rodríguez; ME Serrano-Serrano; MM Zamora-Gómez; and MP Zazo-Lázaro.

### **Competing interests**

The authors declare that there is no duality of interest associated with this manuscript.

### **References**

1. Worldwide trends in diabetes since 1980: a pooled analysis of 751 population-based studies with 4.4 million participants. *The Lancet*. 2016 Apr;387(10027):1513–30.
2. Soriguer F, Goday A, Bosch-Comas A, Bordiú E, Calle-Pascual A, Carmena R, et al. Prevalence of diabetes mellitus and impaired glucose regulation in Spain: the Di@bet.es Study. *Diabetologia*. 2012 Jan;55(1):88–93.

- 1
- 2
- 3 3. Knol MJ, Twisk JWR, Beekman ATF, Heine RJ, Snoek FJ, Pouwer F. Depression as a risk factor for  
4 the onset of type 2 diabetes mellitus. A meta-analysis. *Diabetologia*. 2006 May;49(5):837–45.
- 5
- 6 4. Anderson RJ, Freedland KE, Clouse RE, Lustman PJ. The prevalence of comorbid depression in  
7 adults with diabetes: a meta-analysis. *Diabetes Care*. 2001 Jun;24(6):1069–78.
- 8
- 9 5. Golden SH, Lazo M, Carnethon M, Bertoni AG, Schreiner PJ, Diez Roux AV, et al. Examining a  
10 bidirectional association between depressive symptoms and diabetes. *JAMA*. 2008 Jun  
11 18;299(23):2751–9.
- 12
- 13 6. Lunghi C, Moisan J, Grégoire J-P, Guénette L. Incidence of Depression and Associated Factors in  
14 Patients With Type 2 Diabetes in Quebec, Canada: A Population-Based Cohort Study. *Medicine*  
15 (Baltimore). 2016 May;95(21):e3514.
- 16
- 17 7. van Dooren FEP, Nefs G, Schram MT, Verhey FRJ, Denollet J, Pouwer F. Depression and risk of  
18 mortality in people with diabetes mellitus: a systematic review and meta-analysis. *PloS One*.  
19 2013;8(3):e57058.
- 20
- 21 8. de Groot M, Anderson R, Freedland KE, Clouse RE, Lustman PJ. Association of depression and  
22 diabetes complications: a meta-analysis. *Psychosom Med*. 2001 Aug;63(4):619–30.
- 23
- 24 9. Lustman PJ, Clouse RE. Depression in diabetic patients: the relationship between mood and  
25 glycemic control. *J Diabetes Complications*. 2005 Apr;19(2):113–22.
- 26
- 27 10. Schram MT, Baan CA, Pouwer F. Depression and quality of life in patients with diabetes: a  
28 systematic review from the European depression in diabetes (EDID) research consortium. *Curr*  
29 *Diabetes Rev*. 2009 May;5(2):112–9.
- 30
- 31 11. Jimenez-Garcia R, Martinez Huedo MA, Hernandez-Barrera V, Lopez de Andres A, Martinez D,  
32 Jimenez-Trujillo I, et al. Psychological distress and mental disorders among Spanish diabetic  
33 adults: a case-control study. *Prim Care Diabetes*. 2012 Jul;6(2):149–56.
- 34
- 35 12. Nicolau J, Simó R, Sanchís P, Ayala L, Fortuny R, Rivera R, et al. Prevalence and Clinical Correlators  
36 of Undiagnosed Significant Depressive Symptoms Among Individuals with Type 2 Diabetes In A  
37 Mediterranean Population. *Exp Clin Endocrinol Diabetes Off J Ger Soc Endocrinol Ger Diabetes*  
38 *Assoc*. 2016 Nov;124(10):630–6.
- 39
- 40 13. Lopez-de-Andrés A, Jiménez-Trujillo MI, Hernández-Barrera V, de Miguel-Yanes JM, Méndez-  
41 Bailón M, Perez-Farinos N, et al. Trends in the prevalence of depression in hospitalized patients  
42 with type 2 diabetes in Spain: analysis of hospital discharge data from 2001 to 2011. *PloS One*.  
43 2015;10(2):e0117346.
- 44
- 45 14. Alonso-Morán E, Satylganova A, Orueta JF, Nuño-Solinis R. Prevalence of depression in adults with  
46 type 2 diabetes in the Basque Country: relationship with glycaemic control and health care costs.  
47 *BMC Public Health*. 2014 Jul 30;14:769.
- 48
- 49 15. Esteban y Peña MM, Hernandez Barrera V, Fernández Cordero X, Gil de Miguel A, Rodríguez Pérez  
50 M, Lopez-de Andres A, et al. Self-perception of health status, mental health and quality of life  
51 among adults with diabetes residing in a metropolitan area. *Diabetes Metab*. 2010 Sep;36(4):305–  
52 11.
- 53
- 54 16. Hervás A, Zabaleta A, De Miguel G, Beldarráin O, Díez J. [Health related quality of life in patients  
55 with diabetes mellitus type 2]. *An Sist Sanit Navar*. 2007 Apr;30(1):45–52.
- 56
- 57 17. Salinero-Fort MÁ, San Andrés-Rebollo FJ, de Burgos-Lunar C, Arrieta-Blanco FJ, Gómez-Campelo P,  
58 MADIABETES Group. Four-year incidence of diabetic retinopathy in a Spanish cohort: the  
59 MADIABETES study. *PloS One*. 2013;8(10):e76417.
- 60

18. de Burgos-Lunar C, Gómez-Campelo P, Cárdenas-Valladolid J, Fuentes-Rodríguez CY, Granados-Menéndez MI, López-López F, et al. Effect of depression on mortality and cardiovascular morbidity in type 2 diabetes mellitus after 3 years follow up. The DIADEMA study protocol. *BMC Psychiatry*. 2012 Jul 30;12:95.
19. World Organization of National Colleges, Academies, and Academic Associations of General Practitioners/Family Physicians, editor. *ICPC-2-R: international classification of primary care*. Rev. 2nd ed. Oxford ; New York: Oxford University Press; 2005. 193 p. (Oxford medical publications).
20. World Health Organization, editor. *International statistical classification of diseases and related health problems*. 10th revision, 2nd edition. Geneva: World Health Organization; 2004. 3 p.
21. Pan A, Lucas M, Sun Q, van Dam RM, Franco OH, Willett WC, et al. Increased Mortality Risk in Women With Depression and Diabetes Mellitus. *Arch Gen Psychiatry*. 2011 Jan 3;68(1):42.
22. Sheehan DV, Lecrubier Y, Sheehan KH, Amorim P, Janavs J, Weiller E, et al. The Mini-International Neuropsychiatric Interview (M.I.N.I.): the development and validation of a structured diagnostic psychiatric interview for DSM-IV and ICD-10. *J Clin Psychiatry*. 1998;59 Suppl 20:22-33;quiz 34-57.
23. Ferrando L, Bobes J, Gibert J, Soto M, Soto O. Mini International Neuropsychiatric Interview. Versión en español 5.0.0. 2000: Madrid.
24. Sherbourne CD, Stewart AL. The MOS social support survey. *Soc Sci Med* 1982. 1991;32(6):705–14.
25. Ware JE, Kosinski M, Keller SD. *How to score the SF-12 physical and mental health summaries: a user's manual*. Boston: New England Medical Centre; 1995.
26. Gómez-Benito J, Ruiz C, Guilera G. A Spanish version of the Athens Insomnia Scale. *Qual Life Res Int J Qual Life Asp Treat Care Rehabil*. 2011 Aug;20(6):931–7.
27. Egede LE, Ellis C. Diabetes and depression: global perspectives. *Diabetes Res Clin Pract*. 2010 Mar;87(3):302–12.
28. Lin EHB, Katon W, Rutter C, Simon GE, Ludman EJ, Von Korff M, et al. Effects of enhanced depression treatment on diabetes self-care. *Ann Fam Med*. 2006 Feb;4(1):46–53.
29. Lin EHB, Rutter CM, Katon W, Heckbert SR, Ciechanowski P, Oliver MM, et al. Depression and advanced complications of diabetes: a prospective cohort study. *Diabetes Care*. 2010 Feb;33(2):264–9.
30. Habtewold TD, Alemu SM, Haile YG. Sociodemographic, clinical, and psychosocial factors associated with depression among type 2 diabetic outpatients in Black Lion General Specialized Hospital, Addis Ababa, Ethiopia: a cross-sectional study. *BMC Psychiatry [Internet]*. 2016 Dec [cited 2017 Aug 25];16(1). Available from: <http://bmcp psychiatry.biomedcentral.com/articles/10.1186/s12888-016-0809-6>
31. Kraaij V, Arensman E, Spinhoven P. Negative Life Events and Depression in Elderly Persons: A Meta-Analysis. *J Gerontol B Psychol Sci Soc Sci*. 2002 Jan 1;57(1):P87–94.
32. Krag MØ, Hasselbalch L, Siersma V, Nielsen ABS, Reventlow S, Malterud K, et al. The impact of gender on the long-term morbidity and mortality of patients with type 2 diabetes receiving structured personal care: a 13 year follow-up study. *Diabetologia*. 2016 Feb;59(2):275–85.
33. Cols-Sagarra C, López-Simarro F, Alonso-Fernández M, Mancera-Romero J, Pérez-Unanua MP, Mediavilla-Bravo JJ, et al. Prevalence of depression in patients with type 2 diabetes attended in primary care in Spain. *Prim Care Diabetes*. 2016 Oct;10(5):369–75.

- 1
  - 2
  - 3
  - 4
  - 5
  - 6
  - 7
  - 8
  - 9
  - 10
  - 11
  - 12
  - 13
  - 14
  - 15
  - 16
  - 17
  - 18
  - 19
  - 20
  - 21
  - 22
  - 23
  - 24
  - 25
  - 26
  - 27
  - 28
  - 29
  - 30
  - 31
  - 32
  - 33
  - 34
  - 35
  - 36
  - 37
  - 38
  - 39
  - 40
  - 41
  - 42
  - 43
  - 44
  - 45
  - 46
  - 47
  - 48
  - 49
  - 50
  - 51
  - 52
  - 53
  - 54
  - 55
  - 56
  - 57
  - 58
  - 59
  - 60
34. Naranjo DM, Fisher L, Areán PA, Hessler D, Mullan J. Patients with type 2 diabetes at risk for major depressive disorder over time. *Ann Fam Med*. 2011 Apr;9(2):115–20.
35. Dalgard OS, Dowrick C, Lehtinen V, Vazquez-Barquero JL, Casey P, Wilkinson G, et al. Negative life events, social support and gender difference in depression: a multinational community survey with data from the ODIN study. *Soc Psychiatry Psychiatr Epidemiol*. 2006 Jun;41(6):444–51.
36. Cole MG. Brief interventions to prevent depression in older subjects: a systematic review of feasibility and effectiveness. *Am J Geriatr Psychiatry Off J Am Assoc Geriatr Psychiatry*. 2008 Jun;16(6):435–43.
37. Petrak F, Baumeister H, Skinner TC, Brown A, Holt RIG. Depression and diabetes: treatment and health-care delivery. *Lancet Diabetes Endocrinol*. 2015 Jun;3(6):472–85.
38. Standards of Medical Care in Diabetes—2016 Abridged for Primary Care Providers. *Clin Diabetes*. 2016 Jan;34(1):3–21.
39. Mocan AS, Iancu SS, Duma L, Mureseanu C, Baban AS. Depression in romanian patients with type 2 diabetes: prevalence and risk factors. *Clujul Med* 1957. 2016;89(3):371–7.
40. Yoshida S, Hirai M, Suzuki S, Awata S, Oka Y. Neuropathy is associated with depression independently of health-related quality of life in Japanese patients with diabetes. *Psychiatry Clin Neurosci*. 2009 Feb;63(1):65–72.
41. Sundaram M, Kavookjian J, Patrick JH, Miller L-A, Madhavan SS, Scott VG. Quality of life, health status and clinical outcomes in Type 2 diabetes patients. *Qual Life Res Int J Qual Life Asp Treat Care Rehabil*. 2007 Mar;16(2):165–77.
42. McCollum M, Ellis SL, Regensteiner JG, Zhang W, Sullivan PW. Minor depression and health status among US adults with diabetes mellitus. *Am J Manag Care*. 2007 Feb;13(2):65–72.
43. Mossey JM, Shapiro E. Self-rated health: a predictor of mortality among the elderly. *Am J Public Health*. 1982 Aug;72(8):800–8.
44. Idler EL, Benyamini Y. Self-rated health and mortality: a review of twenty-seven community studies. *J Health Soc Behav*. 1997 Mar;38(1):21–37.
45. Delaney G, Newlyn N, Pamplona E, Hocking SL, Glastras SJ, McGrath RT, et al. Identification of Patients With Diabetes Who Benefit Most From a Health Coaching Program in Chronic Disease Management, Sydney, Australia, 2013. *Prev Chronic Dis*. 2017 Mar 2;14:E21.
46. Otieno CF, Kanu JE, Karari EM, Okech-Helu V, Joshi MD, Mutai K. Glucose-lowering therapies, adequacy of metabolic control, and their relationship with comorbid depression in outpatients with type 2 diabetes in a tertiary hospital in Kenya. *Diabetes Metab Syndr Obes Targets Ther*. 2017;10:141–9.
47. Brilman EI, Ormel J. Life events, difficulties and onset of depressive episodes in later life. *Psychol Med*. 2001 Jul;31(5):859–69.
48. de Jonge P, Roy JF, Saz P, Marcos G, Lobo A, ZARADEMP Investigators. Prevalent and incident depression in community-dwelling elderly persons with diabetes mellitus: results from the ZARADEMP project. *Diabetologia*. 2006 Nov;49(11):2627–33.

- 1  
2  
3 49. Knol MJ, Heerdink ER, Egberts ACG, Geerlings MI, Gorter KJ, Numans ME, et al. Depressive  
4 symptoms in subjects with diagnosed and undiagnosed type 2 diabetes. *Psychosom Med*. 2007  
5 May;69(4):300–5.  
6  
7 50. Nouwen A, Winkley K, Twisk J, Lloyd CE, Peyrot M, Ismail K, et al. Type 2 diabetes mellitus as a risk  
8 factor for the onset of depression: a systematic review and meta-analysis. *Diabetologia*. 2010  
9 Dec;53(12):2480–6.  
10  
11 51. Lambert GW, Reid C, Kaye DM, Jennings GL, Esler MD. Effect of sunlight and season on serotonin  
12 turnover in the brain. *Lancet*. 2002;360(9348):1840-2  
13  
14 52. Hasan SS, Mamun AA, Clavarino AM, Kairuz T. Incidence and risk of depression associated with  
15 diabetes in adults: evidence from longitudinal studies. *Community Ment Health J*. 2015  
16 Feb;51(2):204–10.  
17  
18 53. Kim J-M, Stewart R, Kim S-W, Yang S-J, Shin I-S, Yoon J-S. Vascular risk factors and incident late-life  
19 depression in a Korean population. *Br J Psychiatry J Ment Sci*. 2006 Jul;189:26–30.  
20  
21 54. Maraldi C, Volpato S, Penninx BW, Yaffe K, Simonsick EM, Strotmeyer ES, et al. Diabetes mellitus,  
22 glycemic control, and incident depressive symptoms among 70- to 79-year-old persons: the  
23 health, aging, and body composition study. *Arch Intern Med*. 2007 Jun 11;167(11):1137–44.  
24  
25  
26  
27  
28  
29  
30  
31  
32  
33  
34  
35  
36  
37  
38  
39  
40  
41  
42  
43  
44  
45  
46  
47  
48  
49  
50  
51  
52  
53  
54  
55  
56  
57  
58  
59  
60

1  
2  
3 **Figure 1- Flowchart**  
4  
5  
6  
7  
8  
9  
10  
11  
12  
13  
14  
15  
16  
17  
18  
19  
20  
21  
22  
23  
24  
25  
26  
27  
28  
29  
30  
31  
32  
33  
34  
35  
36  
37  
38  
39  
40  
41  
42  
43  
44  
45  
46  
47  
48  
49  
50  
51  
52  
53  
54  
55  
56  
57  
58  
59  
60

For peer review only



1  
2  
3  
4  
5  
6  
7  
8  
9  
10  
11  
12  
13  
14  
15  
16  
17  
18  
19  
20  
21  
22  
23  
24  
25  
26  
27  
28  
29  
30  
31  
32  
33  
34  
35  
36  
37  
38  
39  
40  
41  
42  
43  
44  
45  
46  
47  
48  
49  
50  
51  
52  
53  
54  
55  
56  
57  
58  
59  
60

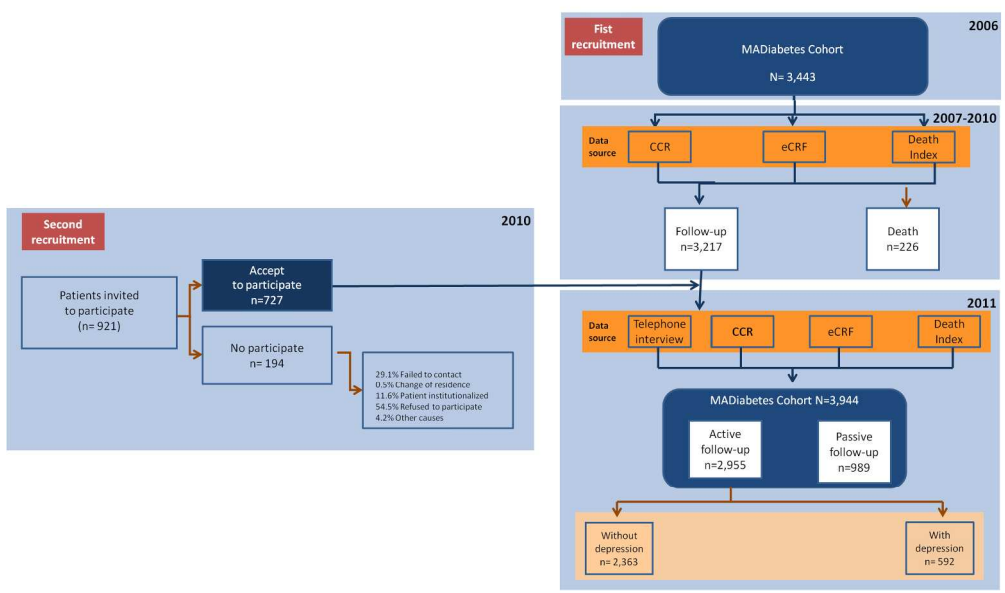

387x242mm (300 x 300 DPI)

Review only

## STROBE Statement—checklist of items that should be included in reports of observational studies

|                              | Item No         | Recommendation                                                                                                                                                                                                                                                                                                                                                                                                                                                                                                                                                                                                                                                                                   |
|------------------------------|-----------------|--------------------------------------------------------------------------------------------------------------------------------------------------------------------------------------------------------------------------------------------------------------------------------------------------------------------------------------------------------------------------------------------------------------------------------------------------------------------------------------------------------------------------------------------------------------------------------------------------------------------------------------------------------------------------------------------------|
| <b>Title and abstract</b>    | 1<br>Pag. 1     | (a) Indicate the study's design with a commonly used term in the title or the abstract<br>(b) Provide in the abstract an informative and balanced summary of what was done and what was found                                                                                                                                                                                                                                                                                                                                                                                                                                                                                                    |
| <b>Introduction</b>          |                 |                                                                                                                                                                                                                                                                                                                                                                                                                                                                                                                                                                                                                                                                                                  |
| Background/rationale         | 2<br>Pag. 5     | Explain the scientific background and rationale for the investigation being reported                                                                                                                                                                                                                                                                                                                                                                                                                                                                                                                                                                                                             |
| Objectives                   | 3<br>Pag. 5     | State specific objectives, including any prespecified hypotheses                                                                                                                                                                                                                                                                                                                                                                                                                                                                                                                                                                                                                                 |
| <b>Methods</b>               |                 |                                                                                                                                                                                                                                                                                                                                                                                                                                                                                                                                                                                                                                                                                                  |
| Study design                 | 4<br>Pag. 6     | Present key elements of study design early in the paper                                                                                                                                                                                                                                                                                                                                                                                                                                                                                                                                                                                                                                          |
| Setting                      | 5<br>Pag. 6     | Describe the setting, locations, and relevant dates, including periods of recruitment, exposure, follow-up, and data collection                                                                                                                                                                                                                                                                                                                                                                                                                                                                                                                                                                  |
| Participants                 | 6<br>Pag. 6     | (a) <i>Cohort study</i> —Give the eligibility criteria, and the sources and methods of selection of participants. Describe methods of follow-up<br><i>Case-control study</i> —Give the eligibility criteria, and the sources and methods of case ascertainment and control selection. Give the rationale for the choice of cases and controls<br><i>Cross-sectional study</i> —Give the eligibility criteria, and the sources and methods of selection of participants<br>(b) <i>Cohort study</i> —For matched studies, give matching criteria and number of exposed and unexposed<br><i>Case-control study</i> —For matched studies, give matching criteria and the number of controls per case |
| Variables                    | 7<br>Pag. 8-10  | Clearly define all outcomes, exposures, predictors, potential confounders, and effect modifiers. Give diagnostic criteria, if applicable                                                                                                                                                                                                                                                                                                                                                                                                                                                                                                                                                         |
| Data sources/<br>measurement | 8*<br>Pag. 7-8  | For each variable of interest, give sources of data and details of methods of assessment (measurement). Describe comparability of assessment methods if there is more than one group                                                                                                                                                                                                                                                                                                                                                                                                                                                                                                             |
| Bias                         | 9<br>Pag. 10    | Describe any efforts to address potential sources of bias                                                                                                                                                                                                                                                                                                                                                                                                                                                                                                                                                                                                                                        |
| Study size                   | 10<br>Pag. 6    | Explain how the study size was arrived at                                                                                                                                                                                                                                                                                                                                                                                                                                                                                                                                                                                                                                                        |
| Quantitative variables       | 11<br>Pag. 8-10 | Explain how quantitative variables were handled in the analyses. If applicable, describe which groupings were chosen and why                                                                                                                                                                                                                                                                                                                                                                                                                                                                                                                                                                     |
| Statistical methods          | 12<br>Pag. 10   | (a) Describe all statistical methods, including those used to control for confounding<br>(b) Describe any methods used to examine subgroups and interactions<br>(c) Explain how missing data were addressed<br>(d) <i>Cohort study</i> —If applicable, explain how loss to follow-up was addressed                                                                                                                                                                                                                                                                                                                                                                                               |

1  
2  
3  
4  
5  
6  
7  
8  
9  
10  
11  
12  
13  
14  
15  
16  
17  
18  
19  
20  
21  
22  
23  
24  
25  
26  
27  
28  
29  
30  
31  
32  
33  
34  
35  
36  
37  
38  
39  
40  
41  
42  
43  
44  
45  
46  
47  
48  
49  
50  
51  
52  
53  
54  
55  
56  
57  
58  
59  
60

*Case-control study*—If applicable, explain how matching of cases and controls was addressed

*Cross-sectional study*—If applicable, describe analytical methods taking account of sampling strategy

---

(e) Describe any sensitivity analyses

Continued on next page

For peer review only

**Results**

|                  |     |                                                                                                                                                                                                                                                                                                                                                                                                               |
|------------------|-----|---------------------------------------------------------------------------------------------------------------------------------------------------------------------------------------------------------------------------------------------------------------------------------------------------------------------------------------------------------------------------------------------------------------|
| Participants     | 13* | (a) Report numbers of individuals at each stage of study—eg numbers potentially eligible, examined for eligibility, confirmed eligible, included in the study, completing follow-up, and analysed<br>(b) Give reasons for non-participation at each stage<br>(c) Consider use of a flow diagram                                                                                                               |
| Descriptive data | 14* | (a) Give characteristics of study participants (eg demographic, clinical, social) and information on exposures and potential confounders<br>(b) Indicate number of participants with missing data for each variable of interest<br>(c) <i>Cohort study</i> —Summarise follow-up time (eg, average and total amount)                                                                                           |
| Outcome data     | 15* | <i>Cohort study</i> —Report numbers of outcome events or summary measures over time<br><i>Case-control study</i> —Report numbers in each exposure category, or summary measures of exposure<br><i>Cross-sectional study</i> —Report numbers of outcome events or summary measures                                                                                                                             |
| Main results     | 16  | (a) Give unadjusted estimates and, if applicable, confounder-adjusted estimates and their precision (eg, 95% confidence interval). Make clear which confounders were adjusted for and why they were included<br>(b) Report category boundaries when continuous variables were categorized<br>(c) If relevant, consider translating estimates of relative risk into absolute risk for a meaningful time period |
| Other analyses   | 17  | Report other analyses done—eg analyses of subgroups and interactions, and sensitivity analyses                                                                                                                                                                                                                                                                                                                |

**Discussion**

|                  |    |                                                                                                                                                                            |
|------------------|----|----------------------------------------------------------------------------------------------------------------------------------------------------------------------------|
| Key results      | 18 | Summarise key results with reference to study objectives                                                                                                                   |
| Limitations      | 19 | Discuss limitations of the study, taking into account sources of potential bias or imprecision. Discuss both direction and magnitude of any potential bias                 |
| Interpretation   | 20 | Give a cautious overall interpretation of results considering objectives, limitations, multiplicity of analyses, results from similar studies, and other relevant evidence |
| Generalisability | 21 | Discuss the generalisability (external validity) of the study results                                                                                                      |

**Other information**

|         |    |                                                                                                                                                               |
|---------|----|---------------------------------------------------------------------------------------------------------------------------------------------------------------|
| Funding | 22 | Give the source of funding and the role of the funders for the present study and, if applicable, for the original study on which the present article is based |
|---------|----|---------------------------------------------------------------------------------------------------------------------------------------------------------------|

\*Give information separately for cases and controls in case-control studies and, if applicable, for exposed and unexposed groups in cohort and cross-sectional studies.

**Note:** An Explanation and Elaboration article discusses each checklist item and gives methodological background and published examples of transparent reporting. The STROBE checklist is best used in conjunction with this article (freely available on the Web sites of PLoS Medicine at <http://www.plosmedicine.org/>, Annals of Internal Medicine at <http://www.annals.org/>, and Epidemiology at <http://www.epidem.com/>). Information on the STROBE Initiative is available at [www.strobe-statement.org](http://www.strobe-statement.org).

# BMJ Open

## The DIADEMA Study- Prevalence of depression in patients with Type 2 Diabetes Mellitus in Spain: Results from the MADiabetes Cohort.

|                                 |                                                                                                                                                                                                                                                                                                                                                                                                                                                                                                                                                                                                                                                                                                                                                                                                                                                                                                                                                                                                                                                                                                                                                                                                                                                                                                                   |
|---------------------------------|-------------------------------------------------------------------------------------------------------------------------------------------------------------------------------------------------------------------------------------------------------------------------------------------------------------------------------------------------------------------------------------------------------------------------------------------------------------------------------------------------------------------------------------------------------------------------------------------------------------------------------------------------------------------------------------------------------------------------------------------------------------------------------------------------------------------------------------------------------------------------------------------------------------------------------------------------------------------------------------------------------------------------------------------------------------------------------------------------------------------------------------------------------------------------------------------------------------------------------------------------------------------------------------------------------------------|
| Journal:                        | <i>BMJ Open</i>                                                                                                                                                                                                                                                                                                                                                                                                                                                                                                                                                                                                                                                                                                                                                                                                                                                                                                                                                                                                                                                                                                                                                                                                                                                                                                   |
| Manuscript ID                   | bmjopen-2017-020768.R2                                                                                                                                                                                                                                                                                                                                                                                                                                                                                                                                                                                                                                                                                                                                                                                                                                                                                                                                                                                                                                                                                                                                                                                                                                                                                            |
| Article Type:                   | Research                                                                                                                                                                                                                                                                                                                                                                                                                                                                                                                                                                                                                                                                                                                                                                                                                                                                                                                                                                                                                                                                                                                                                                                                                                                                                                          |
| Date Submitted by the Author:   | 23-May-2018                                                                                                                                                                                                                                                                                                                                                                                                                                                                                                                                                                                                                                                                                                                                                                                                                                                                                                                                                                                                                                                                                                                                                                                                                                                                                                       |
| Complete List of Authors:       | <p>SALINERO-FORT, MIGUEL; Servicio Madrileño de Salud, Gerencia de Atención Primaria<br/> GÓMEZ-CAMPELO, PALOMA; Fundación Investigación Biomédica Hospital Universitario La Paz, IdiPAZ; Universidad Antonio de Nebrija Ciencias de la Salud, Centro de Ciencias de la Salud San Rafael<br/> San Andrés-Rebollo, Javier; Servicio Madrileño de Salud<br/> Cárdenas-Valladolid, Juan; Comunidad de Madrid Servicio Madrileño de Salud<br/> ABANADES-HERRANZ, JUAN; Servicio Madrileño de Salud, Gerencia Adjunta Planificación y Calidad de Atención Primaria<br/> Carrillo de Santa Pau, Enrique; Centro Nacional de Investigaciones Oncológicas<br/> Chico-Moraleja, Rosa; Hospital Central de la Defensa Gomez Ulla<br/> Beamud-Victoria, Domingo; Comunidad de Madrid Servicio Madrileño de Salud, Centro de Salud Felipe II<br/> de Miguel-Yanes, Jose; Hospital General Universitario Gregorio Marañón, Internal Medicine Department<br/> Jimenez-Garcia, Rodrigo; Univ Rey Juan Carlos,<br/> Lopez-de-Andres, Ana ; Universidad Rey Juan Carlos, Preventive Medicine and Public Health Teaching and Research Unit.<br/> Ramallo-Fariña , Yolanda; Fundacion Investigacion Biomedica Del Hospital Universitario La Paz<br/> DE BURGOS-LUNAR, CARMEN; Hospital Universitario La Paz, Medicina Preventiva</p> |
| <b>Primary Subject Heading</b>: | Diabetes and endocrinology                                                                                                                                                                                                                                                                                                                                                                                                                                                                                                                                                                                                                                                                                                                                                                                                                                                                                                                                                                                                                                                                                                                                                                                                                                                                                        |
| Secondary Subject Heading:      | Mental health, Epidemiology                                                                                                                                                                                                                                                                                                                                                                                                                                                                                                                                                                                                                                                                                                                                                                                                                                                                                                                                                                                                                                                                                                                                                                                                                                                                                       |
| Keywords:                       | Depression, Diabetes Mellitus, Type 2, Self-Care, Cohort Studies                                                                                                                                                                                                                                                                                                                                                                                                                                                                                                                                                                                                                                                                                                                                                                                                                                                                                                                                                                                                                                                                                                                                                                                                                                                  |
|                                 |                                                                                                                                                                                                                                                                                                                                                                                                                                                                                                                                                                                                                                                                                                                                                                                                                                                                                                                                                                                                                                                                                                                                                                                                                                                                                                                   |

SCHOLARONE™  
Manuscripts

**The DIADEMA Study- Prevalence of depression in patients with Type 2 Diabetes Mellitus in Spain: Results from the MADiabetes Cohort.**

Salinero-Fort, M.A.<sup>1,2,5</sup>; Gómez-Campelo, P.<sup>3,4,5,\*</sup>, San Andrés-Rebollo, F.J.<sup>5</sup>; Cárdenas-Valladolid, J.<sup>6</sup>; Abánades-Herranz, J.C.<sup>7</sup>; Carrillo de Santa Pau, E.<sup>8</sup>; Chico-Moraleja, R.M.<sup>9</sup>; Beamud-Victoria, D.<sup>10</sup>; de Miguel-Yanes, J.M.<sup>11</sup>; Jiménez-García, R.<sup>12</sup>; López-de Andrés A.<sup>12</sup>; Ramallo-Fariña Y<sup>2,13</sup>; and De Burgos-Lunar, C.<sup>2,14</sup>. On behalf of MADIABETES Research Group.

1. Subdirección General de Investigación Sanitaria. Consejería de Sanidad, Madrid, Spain.
2. Red de Investigación en Servicios de Salud en Enfermedades Crónicas (REDISSEC).
3. Hospital La Paz Institute for Health Research (IdiPAZ), La Paz University Hospital, Madrid, Spain.
4. Centro de Ciencias de la Salud San Rafael, Universidad Antonio de Nebrija, Madrid, Spain
5. Centro de Salud Las Calesas, Servicio Madrileño de Salud, Madrid, Spain.
6. Gerencia Adjunta de Planificación y Calidad, Gerencia de Atención Primaria, Servicio Madrileño de Salud, Madrid, Spain.
7. Centro de Salud Monóvar, Servicio Madrileño de Salud, Madrid, Spain.
8. Centro Nacional de Investigaciones Oncológicas, Madrid, Spain.
9. Hospital Central de la Defensa, Madrid, Spain.
10. Centro de Salud Felipe II, Madrid, Spain
11. Hospital Gregorio Marañón, Madrid, Spain.
12. Facultad de Ciencias de la Salud, Universidad Rey Juan Carlos, Alcorcón, Madrid, Spain.
13. Fundación Canaria de Investigación Sanitaria (FUNCANIS), Tenerife, Spain
14. Centro de Salud Isla de Oza, Servicio Madrileño de Salud, Madrid, Spain.

1  
2  
3     <sup>§</sup> Equal contribution  
4  
5

6  
7     \* **Corresponding author:**  
8

9     P. Gómez-Campelo

10    Hospital La Paz Institute for Health Research (IdiPAZ), La Paz University Hospital, Madrid,

11  
12  
13    Spain

14  
15    [pgomezc@salud.madrid.org](mailto:pgomezc@salud.madrid.org)  
16

17    Address: Pº de la Castellana, 261

18  
19         28046 Madrid

20  
21         Phone: +34 91 207 14 44

22  
23         Fax: +34 91 727 75 24  
24  
25  
26  
27  
28  
29  
30  
31  
32  
33  
34  
35  
36  
37  
38  
39  
40  
41  
42  
43  
44  
45  
46  
47  
48  
49  
50  
51  
52  
53  
54  
55  
56  
57  
58  
59  
60

## 1. Abstract

Objective: To estimate the prevalence of depression in patients diagnosed with type 2 diabetes mellitus (T2DM), and to identify sociodemographic, clinical, and psychological factors associated with depression in this population. Additionally, we examine the annual incidence rate of depression among T2DM patients.

Methods: We performed a large prospective cohort study of patients with T2DM from MADIABETES Study. The first recruitment drive included 3,443 patients. A second recruitment drive included 727 new patients. Data have been collected since 2007 (baseline visit) and annually during the follow-up period (since 2008).

Results: Depression was prevalent in 20.03% of patients (n=592; 95%CI, 18.6 to 21.5), and was associated with previous personal history of depression (OR, 6.482; 95%CI, 5.138 to 8.178), mental health status below mean (OR, 1.423; 95%CI, 1.452 to 2.577), neuropathy (OR, 1.951; 95%CI, 1.423 to 2.674), fair or poor self reported health status (OR, 1.509; 95%CI, 1.209 to 1.882), treatment with oral antidiabetic agents plus insulin (OR, 1.802; 95%CI, 1.364 to 2.380), female gender (OR, 1.333; 95%CI, 1.009 to 1.761), and blood cholesterol level (OR, 1.005; 95%CI, 1.002 to 1.009).

The variables inversely associated with depression were: being in employment (OR, 0.595; 95%CI, 0.397 to 0.894), low physical activity (OR, 0.552; 95%CI, 0.408 to 0.746), systolic blood pressure (OR, 0.982; 95%CI, 0.971 to 0.992), and social support (OR, 0.978; 95%CI, 0.963 to 0.993). In patients without depression at baseline, the incidence of depression after one year of follow-up was 1.20% (95%CI, 1.11 to 2.81).

Conclusions: Depression is very prevalent among patients with T2DM and is associated with several key diabetes-related outcomes. Our results suggest that previous mental status, self-reported health status, gender and several diabetes-related complications are associated with differences in the degree of depression. These findings should alert practitioners to the importance of detecting depression in patients with T2DM.



### Strengths and limitations of this study

- Time between both telephone interviews for depression screening was too short (12 months), making it difficult to compare cumulative incidence rates with those other studies.
- We preferred to exclude antidepressant agents from our combined variable for depression, because the antidepressants can be prescribed for diseases other than depression (i.e., sleeping disorders, migraine, neuropathic pain, obsessive-compulsive disorders, anxiety/panic disorder). In order to compare our findings with multivariable models from different studies, we may have adjusted variables unnecessary. However, fortunately, over-adjustment was avoided (changes >20% between crude and adjusted SE, data not shown).
- The strengths of our study include its prospective design, which ensured that measurement of risk factors preceded the development of depression, and the assessment of information on potentially confounding variables, which reduces potential selection and confusion biases.
- We also used an assessment of depression based on MINI 5.0, which was completed with the patient's general practitioner clinical who used his/her clinical judgment to determine whether the patient's symptoms and signs were compatible with a depressive disorder. Therefore, self-reported diagnosis was avoided.

**Keywords:** Depression; Diabetes Mellitus, Type 2; Self-Care; Cohort Studies.

## 1. Introduction

Currently, an estimated 8%-9% adults worldwide have type 2 diabetes mellitus (T2DM), and a substantial increase in prevalence over time has been observed (1). The prevalence of T2DM in the Spanish population is even higher (13.8%) (2).

Previous studies have shown that coexistence of mental disorders such as depression is considerably more frequent in people with T2DM than in the overall population (3) (4), with an prevalence ranging from 15% to 24% (5) and an incidence rate of depression during the first year after initiation of oral antidiabetic treatment of 12.61 per 1000 person-years (6). The coexistence of diabetes and mental disorders has a strong impact on the patient, with an increased risk of cardiovascular disease, all-cause mortality (7) and cardiovascular mortality (7), especially as a result of cardiovascular complications of T2DM (8). In addition, patients with diabetes and mental disorders show poorer compliance with treatment recommendations than T2DM patients without depression, and more frequently have cardiovascular risk factors such as smoking, obesity, sedentary lifestyle, and poor glycemic control (9), which can impact on their health-related quality of life (10).

To our knowledge, research on common mental disorders affecting patients with T2DM is scarce in Spain (11) (12) (13). In a recent cross-sectional study on patients with T2DM, Alonso-Morán et al. (14) reported that 9.8% of patients were diagnosed with depression (5.2% for males and 15.1% for females), and in a study by Nicolau et al. (12), 27.2% of patients had symptoms of depression. However, in these studies, data collection was often based on health surveys (11) (15) or self-reported scales (12,16), which yielded heterogeneous data. Thus, mental disorders have not been assessed using a clinical interview as the "gold standard".

The aims of the present study were to estimate the prevalence of depression in patients diagnosed with T2DM, and to identify sociodemographic, clinical, and psychological factors associated with the occurrence of depression in this population. Additionally, we examine the one-year incidence rate of depression among T2DM patients.

## 2. Material and Methods

### 2.1. Design and participants

The Madrid Diabetes Study (MADIABETES Study), is a large prospective cohort study of various clinical and psychosocial aspects of outpatients with T2DM living in the metropolitan area of Madrid, Spain. The first recruitment drive was in 2007 and enrolled 3,443 T2DM outpatients from the 56 participating primary health care centers (PHCC). Patients were selected by simple random sampling by participating general practitioners (n= 131) based on the list of patients with a diagnosis of T2DM in their computerized clinical records (CCR). A more complete description of this methodology can be found elsewhere (17).

Reasons for not continuing still completion were leaving the participating PHCC, death or drop-out. Furthermore, the dynamic character of MADIABETES cohort, i.e. new participants could enter over time, helped prevent loss of the study population. Therefore, at the end of 2010, a second recruitment drive involving 41 PHCC included 727 new patients.

The inclusion criteria were: a diagnosis of T2DM in the CCR (code T90 of the International Classification of Primary Care [ICPC-2]) (18), age  $\geq 30$  years, visit to a PHCC at least twice in the previous year, and agreement to take part in the study and provided written informed consent. Patients were excluded for the following reasons: diagnosis of gestational diabetes mellitus, being in an institution, inability to understand Spanish, severe chronic diseases or significant physical or psychological disabilities that might invalidate informed consent or interviews (according to clinical judgment), legal incompetence or legal guardianship, and participation in clinical trials.

For the purpose of evaluating the prevalence of depression (DIAbetes and DEpression in MADrid-DIADeMA Study), we included those patients who participated in the interview process conducted between January 1<sup>st</sup> 2011 and 31<sup>th</sup> December 2011. Furthermore, to estimate the annual incidence of depression, the data from the second interview were included. The original protocol of the study was published in advance (19). Therefore, for the

1  
2  
3 main variable the MADIABETES cohort included a total of 2,955 patients (see the flow diagram  
4  
5 in Figure 1).

## 6 7 2.2. Patient and Public Involvement

8  
9 Major depression is prevalent among patient with diabetes, especially older adults, and is a  
10  
11 risk factor for self-care, complications and death. Therefore, our research question focuses on  
12  
13 screening for depressive symptoms in all patients with diabetes, with particular emphasis on  
14  
15 those with a self-reported history of depression. We use age-appropriate depression screening  
16  
17 measures and are aware that further evaluation will be necessary for individuals with a  
18  
19 positive result. Treatment is prescribed accordingly.

20  
21 Patients were not involved in the design, recruitment or conduct of the study. We report our  
22  
23 results annually at specific meeting, to which we invited the participating general practitioners  
24  
25 and all the patients included in the MADIABETES Cohort.

## 26 27 2.3. Source of data

28  
29 To achieve the goal of the MADIABETES Study, data began to be collected in 2007 (baseline  
30  
31 visit) and then annually during the follow-up period (since 2008). Four data collection  
32  
33 strategies were combined.

34  
35 First, data concerning disease episodes (coded in ICPC-2) (18), prescription of medication  
36  
37 (coded according to the Anatomical Therapeutic Chemical classification system), laboratory  
38  
39 results, anthropometric variables, and use of care facilities were obtained from the CCR. The  
40  
41 CCR for primary health care in the Madrid Health Service was administered by OMI-AP©  
42  
43 software. CCR registration is continuously updated in the PHCC under routine clinical practice  
44  
45 conditions, and once a year, data are transferred to our central database.

46  
47 Second, the general practitioner of each participating patient collected information about  
48  
49 morbidity and mortality, under routine clinical practice conditions using an electronic case  
50  
51 report form (hosted on the website [www.madiabetes.com](http://www.madiabetes.com)). All general practitioners received  
52  
53  
54  
55

1  
2  
3 training to standardize their knowledge of project objectives, data collection techniques and  
4  
5 field work procedures.

6  
7 Third, from 2011 onward, all patients were invited each year to undergo an interview to  
8  
9 provide sociodemographic data, lifestyle data, determinants of health, and psychosocial  
10  
11 characteristics. Data were collected using a previously standardized protocol through a  
12  
13 telephone interview with a clinical psychologist trained in the evaluation procedure of the  
14  
15 study. Lastly, the vital status of the patients was ascertained from two mortality records: *Índice*  
16  
17 *Nacional de Defunciones*  
18  
19 ([https://www.msssi.gob.es/estadEstudios/estadisticas/estadisticas/estMinisterio/IND\\_TipoDif](https://www.msssi.gob.es/estadEstudios/estadisticas/estadisticas/estMinisterio/IND_TipoDif)  
20  
21 [usion.htm](http://www.ine.es)) and *Instituto Nacional de Estadística* (<http://www.ine.es>). The latter indicates the  
22  
23 underlying cause of death recorded on the death certificates, which is coded according to the  
24  
25 International Classification of Diseases, Tenth Revision (20).  
26  
27  
28  
29

#### 30 2.4. Variables

31  
32 The primary outcome variable was depression. The diagnosis of depression was considered a  
33  
34 combined variable, as suggested by other authors (21), consisting of a diagnosis based on the  
35  
36 module of major depressive disorder of the International Neuro-psychiatric Interview (MINI  
37  
38 5.0.0) (22). The interview was applied by a trained psychologist, and the diagnosis was made  
39  
40 with the patient's general practitioner clinical who used his/her clinical judgment to determine  
41  
42 whether the patient's symptoms and signs were compatible with a depressive disorder.  
43  
44

45 The MINI is a short and efficient diagnostic interview to diagnose mental disorders, which was  
46  
47 used in its Spanish version (23).  
48

49 The other *psychosocial variables* evaluated included the following:

50  
51 - A personal history of psychiatric disorder if the patient reported a positive response to the  
52  
53 question: "Has a clinician ever diagnosed you as having any psychiatric disorder?. Alternatively,  
54  
55  
56  
57  
58  
59  
60

1  
2  
3 patients could have been diagnosed with a psychiatric disorder before the last 12-month  
4 interval, as coded in the CCR.

5  
6  
7 - A family history of psychiatric disorder was registered if the patient reported a positive  
8 response to the question: "Has any family member (first-degree relatives) ever been diagnosed  
9 with a psychiatric disorder?"  
10  
11

12  
13 - Anxiety disorder was defined based on the module of generalized anxiety disorder of the  
14 MINI (23) and according to clinical judgment.  
15

16  
17 - Social support, such as network size, was assessed based on the question: "About how many  
18 close friends and close relatives do you have (people you feel at ease with and can talk to  
19 about what is on your mind)?" which corresponds to the first item of the Medical Outcomes  
20 Study-Social Support Survey (MOS-SSS) (24).  
21  
22

23  
24 - Health-related quality of life was measured using the SF-12 questionnaire, a composite of 12  
25 items that assess eight dimensions of health: physical functioning, role-physical, general  
26 health, bodily pain, vitality, social functioning, role-emotional, and mental health (25). The SF-  
27 12 measures various aspects of physical and mental health, from which physical and mental  
28 summary scores are computed using the scores of 12 questions. The score ranges from 0 to  
29 100, where a zero score indicates the lowest level of health and 100 indicates the highest level  
30 of health. Both Physical and Mental Health Composite Scales combine the 12 items in such a  
31 way that they compare with a national norm (mean score of 50.0 and a standard deviation of  
32 10.0).  
33  
34

35  
36 -Insomnia was assessed using the Spanish version of the eight-item Athens Insomnia Scale  
37 (AIS-8) (26) which is a self-reported questionnaire designed to measure the severity of  
38 insomnia based on the diagnostic criteria of the ICD-10 Classification of Mental and  
39 Behavioural Disorders.  
40  
41

42  
43  
44  
45  
46  
47  
48  
49  
50  
51  
52  
53  
54  
55  
56  
57  
58  
59  
60  
*Sociodemographic variables* included age (date of birth), gender, nationality, length of residence in Spain, marital status (single, unmarried partners, married, divorced, widowed),

1  
2  
3 educational level (no studies, primary, high school, university), and employment status  
4  
5 (employed, unemployed, retired, housewife and other).

6  
7 *Medical variables* included the following:

- 8  
9 – Comorbidity variables: hypertension, defined as systolic blood pressure  $\geq 140$  mmHg,  
10  
11 and/or diastolic blood pressure  $\geq 90$  mmHg; heart failure, which was defined as symptoms  
12  
13 of dyspnea or edema associated with bilateral rales, elevated venous pressure, or  
14  
15 interstitial or alveolar edema on chest X-ray, and required the addition of diuretics or  
16  
17 inotropic medications; myocardial infarction, defined as a history of chest pain/discomfort  
18  
19 associated with elevation of ST segment in electrocardiographic in two or more contiguous  
20  
21 leads and elevation of myocardial enzymes; stroke, defined as a rapidly developing clinical  
22  
23 syndrome of focal disturbance of cerebral function that lasted more than 24 hours;  
24  
25 peripheral artery disease, defined as a symptomatic and documented obstruction of the  
26  
27 distal arteries of the leg; low limb amputations, defined as the complete loss in the  
28  
29 transverse anatomical plane of any part of the lower limb; erectile dysfunction, defined as  
30  
31 the consistent inability to achieve or maintain an erection sufficient for satisfactory sexual  
32  
33 performance; retinopathy, defined as a documented diagnosis by an ophthalmologist of  
34  
35 non-proliferative retinopathy, proliferative retinopathy or macular edema; nephropathy,  
36  
37 defined as a history of renal disease due to diabetes mellitus or requiring dialysis;  
38  
39 neuropathy, defined as diminished or lack of perception of touch or pain stimuli and loss of  
40  
41 joint position sense and vibration sense, and renal failure, defined as an estimated  
42  
43 glomerular filtration rate below  $30 \text{ mL}/1.73 \text{ m}^2$ . Cardiovascular disease (CVD) was defined  
44  
45 as one or more of the following: myocardial infarction, stroke or peripheral vascular  
46  
47 disease.  
48  
49  
50  
51 – Other clinical variables: duration of diabetes (years) and family history of diabetes (in the  
52  
53 first-degree relatives).  
54  
55  
56  
57  
58  
59  
60

- 1  
2  
3  
4  
5  
6  
7  
8  
9  
10  
11  
12  
13  
14  
15  
16  
17  
18  
19  
20  
21  
22  
23  
24  
25  
26  
27  
28  
29  
30  
31  
32  
33  
34  
35  
36  
37  
38  
39  
40  
41  
42  
43  
44
- Anthropometric variables: height, weight, body mass index (BMI), hip circumference, waist circumference, systolic blood pressure, and diastolic blood pressure.
  - Laboratory results: albuminuria, creatinine, lipid profile, HbA1c and glucose.
  - Personal health habits: 1. Smoking (never, former or current smoker). 2. Physical activity level which was measured using a short questionnaire based on the FAO/WHO/UNU Expert Consultation Report Energy and Protein Requirements (Geneva, 1985) and administered individually at a medical examination. The answers were coded from 1 to 3, with 1 representing inactivity or sedentary activity (remaining seated or at rest most of the time, sleeping, resting, sitting or standing, walking on flat ground, light housework, playing cards, sewing, cooking, studying, driving, typing, office duties, etc.), 2 representing low activity (walking at 5 km/h, heavy housework [cleaning windows, etc.], jobs such as carpenter, construction workers [except hard work], chemical industry, electrical, mechanized agricultural tasks, playing golf, child care, etc.), and 3, moderate or vigorous activity (non-mechanized agricultural tasks, mining, forestry, digging, chopping wood, hand mowing, climbing, mountaineering, playing football, tennis, jogging, dancing, skiing, etc.). 3. Drinking (0.1 through 4.9, or 5.0 or more g/d of alcohol).
  - Treatment: statins,  $\beta$ -blockers, angiotensin-converting enzyme inhibitors, angiotensin receptor blockers, calcium channel blockers, diuretics, antiplatelet drugs, antidiabetics, antidepressant drugs and anxiolytics.

#### 45 2.5. Statistical analysis

46  
47  
48  
49  
50  
51  
52  
53  
54  
55  
56  
57  
58  
59  
60

Quantitative variables were expressed as mean and standard deviation; qualitative variables were expressed as frequency distribution. Normally distributed continuous variables were compared using the *t* test, non-normally distributed variables were compared using the Mann-Whitney test, and categorical variables were compared using the chi-square test. Effect sizes



1  
2  
3 were calculated using Cohen's d for continuous measures and Cramer's V for categorical  
4  
5 variables.

6  
7 Given the hierarchical structure of our data, we used a logistic regression analysis with two  
8  
9 levels: level 1, patients, and level 2, health centers (our sampling unit). However, in the initial  
10  
11 step (null model), the variation in the prevalence of depression between centers was not  
12  
13 significant ( $\sigma^2_{u0} = 0.02$ , SE = 0.02, p = 0.115), with an intraclass correlation coefficient of  
14  
15 0.007; therefore, we did not consider it necessary to adjust for a hierarchical model.

16  
17 Explanatory multivariable logistic regressions models were constructed to identify variables  
18  
19 that were independently associated with depression (prevalent). We report adjusted odds  
20  
21 ratios (ORs) with their respective 95% confidence intervals (95%CI). Variables that were  
22  
23 statistically significant in the bivariate analysis and those shown to be predictors in previous  
24  
25 studies were included in the multivariate analysis. We analyzed the possibility of over-  
26  
27 adjustment, defined when after adjusting on the covariate it altered the adjusted OR of 10%–  
28  
29 20% with a concomitant change in the standard error (SE) higher than 20%.

30  
31 The annual incidence rate of depression was calculated by the standard method as follows:  
32  
33 number of new cases of depression over a period (year 2011) / population at risk of developing  
34  
35 the disease at the beginning of the period.

36  
37 In all cases, the accepted level of significance was 0.05 or less, with a 95%CI. Data were  
38  
39 processed using the Statistical Package for the Social Sciences (SPSS for windows, version 21.0;  
40  
41 IBM Corp, Armonk, New York, USA).

#### 42 43 44 45 46 47 2.6. Ethical aspects

48  
49 The study was approved by the Institutional Review Board of Ramón y Cajal Hospital (Madrid)  
50  
51 and conducted in accordance with the principles of the Declaration of Helsinki. All patients  
52  
53 gave their written informed consent to participate in the study.  
54  
55  
56  
57  
58  
59  
60

### 3. Results

#### 3.1. Characteristics of the study population and prevalence of depression

A total of 3,443 patients were included in the study at the first recruitment drive (January 2007). Of these 3,217 were alive before the start of the survey (January 2013), and 2,228 agreed to the interview (participation rate: 69.3%). At the second recruitment, 727 patients agreed to participate (December 2010). Therefore, for the main objective of this study, the sample consisted of 2,955 people; 48.1% were women and the mean age was 70.2 years (SD 10.6).

Depression was prevalent in 20.03% (n=592; 95%CI, 18.6 to 21.5) Table 1 shows the characteristics of the sample, stratified by depression status.

Compared with patients without depression, people with depression were more likely to be female ( $p<0.001$ ), older ( $p=0.017$ ), and widowed or divorced ( $p<0.001$ ). They also, had a lower educational level ( $p<0.001$ ), were less frequently classified as employed ( $p<0.001$ ), and had been taking more intense diabetes treatment for longer ( $p<0.001$ ). Furthermore, patients with depression had higher BMIs ( $p<0.001$ ), were lower consumers of alcohol ( $p<0.001$ ), and had higher rates of never smoking ( $p<0.001$ ), sedentary lifestyle ( $p<0.001$ ), neuropathy ( $p<0.001$ ), and renal failure ( $p=0.012$ ). Anxiety was recorded in 14.8% of the sample (n= 438; 95%CI, 13.5 to 16.1). Coexistence of depression and anxiety was recorded in up to 8.6% (n=255) of the patients.

In addition, patients with depression more frequently had previous episodes of depression ( $p<0.001$ ) and anxiety ( $p<0.001$ ), and fair or poor self-reported health status ( $p<0.001$ ) than patients without these disorders. No significant differences were observed between patients with depression and psychologically healthy subjects in the following: family history of diabetes, level of HbA1c, triglycerides values, nephropathy, and retinopathy.

**Table 1. Baseline characteristics of the sample, with and without depression.**

|                                                   | TOTAL<br>(n=2,955) | With depression<br>(n=592) | Without depression<br>(n=2,363) | p value | Effect<br>size*    |
|---------------------------------------------------|--------------------|----------------------------|---------------------------------|---------|--------------------|
| <b>Sociodemographic variables</b>                 |                    |                            |                                 |         |                    |
| Gender (female); % (n)                            | 48.1 (1,421)       | 67.7 (401)                 | 43.02 (1,020)                   | <0.001  | 0.197 <sup>†</sup> |
| Age (years); mean (SD)                            | 70.2 (10.6)        | 71.1 (10.3)                | 69.9 (10.7)                     | 0.017   | 0.110 <sup>‡</sup> |
| Country of origin (foreign-born); % (n)           | 2.4 (70)           | 2.9 (17)                   | 2.2 (53)                        | 0.368   | 0.017 <sup>†</sup> |
| Marital status; % (n)                             |                    |                            |                                 | <0.001  | 0.123 <sup>†</sup> |
| Single without partner                            | 4.6 (136)          | 2.7 (16)                   | 5.1 (120)                       |         |                    |
| Married or with partner                           | 70.4 (2,077)       | 62 (366)                   | 72.5 (1,711)                    |         |                    |
| Divorced                                          | 4.2 (124)          | 5.9 (35)                   | 3.8 (89)                        |         |                    |
| Widowed                                           | 20.8 (614)         | 29.3 (173)                 | 18.7 (441)                      |         |                    |
| Educational level; % (n)                          |                    |                            |                                 | <0.001  | 0.081 <sup>†</sup> |
| Not completed                                     | 20.9 (613)         | 25.7 (152)                 | 19.5 (461)                      |         |                    |
| Primary                                           | 46.7 (1,367)       | 48.6 (288)                 | 46.7 (1,104)                    |         |                    |
| Secondary                                         | 19.7 (576)         | 16.4 (97)                  | 20.3 (479)                      |         |                    |
| University                                        | 12.8 (374)         | 9.3 (55)                   | 13.5 (319)                      |         |                    |
| Employment status; n (%)                          |                    |                            |                                 | <0.001  | 0.084 <sup>†</sup> |
| Employed                                          | 15.7 (459)         | 9.5 (56)                   | 17 (403)                        |         |                    |
| <b>Variables related to diabetes</b>              |                    |                            |                                 |         |                    |
| Duration of diabetes (years); mean (SD)           | 15.4 (10.2)        | 16.5 (10.6)                | 15.06 (10)                      | 0.002   | 0.143 <sup>‡</sup> |
| Family history of diabetes (yes); % (n)           | 61.7 (1,813)       | 64.5 (382)                 | 61.3 (1,448)                    | 0.145   | 0.027 <sup>†</sup> |
| Type of diabetes treatment; % (n)                 |                    |                            |                                 | <0.001  | 0.121 <sup>†</sup> |
| Only diet                                         | 8.4 (248)          | 7.4 (44)                   | 8.6 (204)                       |         |                    |
| Oral antidiabetic agents                          | 53.2 (1,572)       | 47.3 (280)                 | 54.7 (1,292)                    |         |                    |
| Insulin                                           | 5.4 (159)          | 6.9 (41)                   | 5 (118)                         |         |                    |
| Oral antidiabetic agents + insulin                | 16.9 (498)         | 25.2 (149)                 | 14.8 (349)                      |         |                    |
| Not specified                                     | 16.2 (478)         | 13.2 (78)                  | 16.9 (400)                      |         |                    |
| <b>Lifestyle and self-care</b>                    |                    |                            |                                 |         |                    |
| Smoking habit; % (n)                              |                    |                            |                                 | <0.001  | 0.127 <sup>†</sup> |
| Never smoker                                      | 46 (1,360)         | 58.6 (347)                 | 42.9 (1,013)                    |         |                    |
| Ex-smoker                                         | 42.6 (1,259)       | 32.1 (190)                 | 45.2 (1,069)                    |         |                    |
| Smoker                                            | 11.4 (336)         | 9.3 (55)                   | 11.9 (281)                      |         |                    |
| Current regular alcohol use; % (n)                | 883 (33.6)         | 22 (111)                   | 36.4 (772)                      | <0.001  | 0.120 <sup>†</sup> |
| Physical activity; % (n)                          |                    |                            |                                 | <0.001  | 0.117 <sup>†</sup> |
| Sedentary                                         | 11.3 (333)         | 18.4 (109)                 | 9.5 (224)                       |         |                    |
| Low                                               | 81.5 (2,408)       | 76.5 (453)                 | 82.7 (1,955)                    |         |                    |
| Moderate-vigorous                                 | 7.2 (214)          | 5.1 (30)                   | 7.8 (184)                       |         |                    |
| <b>Clinical risk factors</b>                      |                    |                            |                                 |         |                    |
| BMI (kg/m <sup>2</sup> ); mean (SD)               | 31.1 (5.6)         | 32.4 (6.4)                 | 31.2 (5.8)                      | <0.001  | 0.196 <sup>‡</sup> |
| Systolic blood pressure (mmHg); mean (SD)         | 131.5 (12.6)       | 129.3 (12.6)               | 131.9 (11.9)                    | <0.001  | 0.208 <sup>‡</sup> |
| Diastolic blood pressure (mmHg); mean (SD)        | 73.9 (7.5)         | 73.3 (7.6)                 | 74.2 (7.4)                      | <0.001  | 0.120 <sup>†</sup> |
| <b>Biochemical risk factors</b>                   |                    |                            |                                 |         |                    |
| HbA1c (%); mean (SD)                              | 7.1 (1.1)          | 7.1 (1.2)                  | 7.3 (1.5)                       | 0.703   | 0.110 <sup>‡</sup> |
| Triglycerides; mean (SD)                          | 142.4 (87.6)       | 148.9 (89.7)               | 140.7 (86.9)                    | 0.070   | 0.092 <sup>‡</sup> |
| Cholesterol; mean (SD)                            | 175.7 (33.9)       | 181.1 (37.1)               | 174.3 (32.9)                    | <0.001  | 0.194 <sup>‡</sup> |
| LDL-cholesterol; mean (SD)                        | 99.2 (27.3)        | 101.6 (29.9)               | 98.3 (27.1)                     | 0.064   | 0.115 <sup>‡</sup> |
| HDL-cholesterol; mean (SD)                        | 49.5 (13.2)        | 50.6 (12.9)                | 49.1 (13.3)                     | 0.032   | 0.114 <sup>‡</sup> |
| <b>Complications and comorbidities</b>            |                    |                            |                                 |         |                    |
| Cardiovascular event; % (n)                       | 29.7 (1,240)       | 31.9 (212)                 | 29.3 (1,028)                    | 0.178   | 0.021 <sup>†</sup> |
| Heart failure; % (n)                              | 11.5 (480)         | 13.7 (91)                  | 11.1 (389)                      | 0.053   | 0.030 <sup>†</sup> |
| Lower limb amputation; % (n)                      | 1.4 (60)           | 1.8 (12)                   | 1.4 (48)                        | 0.385   | 0.013 <sup>†</sup> |
| Nephropathy; % (n)                                | 13.5 (400)         | 16.2 (96)                  | 12.9 (304)                      | 0.033   | 0.039 <sup>†</sup> |
| Neuropathy; % (n)                                 | 10.1 (299)         | 16.7 (99)                  | 8.5 (200)                       | <0.001  | 0.111 <sup>†</sup> |
| Retinopathy; % (n)                                | 15 (442)           | 15.7 (93)                  | 14.8 (349)                      | 0.566   | 0.011 <sup>†</sup> |
| Renal failure; % (n)                              | 14.3 (424)         | 17.6 (104)                 | 13.5 (320)                      | 0.012   | 0.046 <sup>†</sup> |
| <b>Psychosocial variables</b>                     |                    |                            |                                 |         |                    |
| Family history of depression (Yes); % (n)         | 197 (6.7)          | 10.6 (63)                  | 5.7 (134)                       | <0.001  | 0.080 <sup>†</sup> |
| Personal history of depression (Yes); % (n)       | 557 (18.8)         | 48.6 (288)                 | 11.4 (269)                      | <0.001  | 0.381 <sup>†</sup> |
| Self-reported health status (Fair or poor); % (n) | 34.3 (992)         | 47 (269)                   | 31.1 (723)                      | <0.001  | 0.133 <sup>†</sup> |
| Physical quality of life; mean (SD)               | 40.1 (11.4)        | 35.3 (12.5)                | 41.5 (10.7)                     | <0.001  | 0.533 <sup>‡</sup> |
| Mental quality of life; mean (SD)                 | 47.4 (10.9)        | 41.3 (12.5)                | 49.1 (9.7)                      | <0.001  | 0.697 <sup>‡</sup> |
| Social support (network size); mean (SD)          | 10.2 (8.3)         | 8.5 (7.3)                  | 10.6 (8.5)                      | <0.001  | 0.217 <sup>‡</sup> |
| Sleep (AIS); mean (SD)                            | 2.6 (3.7)          | 5.3 (5.2)                  | 2 (2.9)                         | <0.001  | 0.783 <sup>‡</sup> |

BMI, body mass index; AIS, Athens Insomnia Scale; HbA1c, glycated haemoglobin; <sup>†</sup>Cramer's V; <sup>‡</sup>Cohen's d; \*0.2 is the recommended minimum effect size; Cardiovascular event, includes nonfatal myocardial infarction, stroke, and peripheral artery disease.

### 3.2. Factors associated with prevalent depression

Table 2 shows the variables associated with depression after fully adjustment for potential confounding factors. The variable most strongly associated with depression was previous personal history of depression (OR, 6.482; 95%CI, 5.138 to 8.178;  $p \leq 0.001$ ), followed by neuropathy (OR, 1.951; 95%CI, 1.423 to 2.674;  $p \leq 0.001$ ), treatment with oral antidiabetic agents plus insulin (OR, 1.802; 95%CI, 1.364 to 2.380;  $p \leq 0.001$ ), fair or poor self reported health status (OR, 1.509; 95%CI, 1.209 to 1.882;  $p \leq 0.001$ ), mental health score (SF-12) below the mean (OR, 1.423; 95%CI, 1.054 to 1.921;  $P=0.021$ ),  $\leq$ female gender (OR, 1.333; 95%CI, 1.009 to 1.761;  $p=0.043$ ), and blood cholesterol level (OR, 1.005; 95%CI, 1.002 to 1.009;  $p=0.002$ ).

On the other hand, the variables inversely associated with depression were: being employed (OR, 0.595; 95%CI, 0.397 to 0.894;  $p=0.012$ ), low physical activity (OR, 0.552; 95%CI, 0.408 to 0.746;  $p < 0.001$ ), systolic blood pressure (OR, 0.982; 95%CI, 0.971 to 0.992;  $p=0.001$ ), current alcohol use (OR, 0.726; 95%CI, 0.552 to 0.954) and social support (network size) (OR, 0.978; 95%CI, 0.962 to 0.993;  $p=0.005$ ).

**Table 2. Factors associated with prevalence of depression (logistic regression analysis)**

(Hosmer-Lemeshow= 5.132; df=5;  $p=0.743$ )

|                                                      |                                    | OR    | 95% CI      | P-value |
|------------------------------------------------------|------------------------------------|-------|-------------|---------|
| <b>Gender</b>                                        |                                    |       |             |         |
|                                                      | Male                               | 1     |             |         |
|                                                      | Female                             | 1.333 | 1.009-1.761 | 0.043   |
| <b>Age</b>                                           |                                    |       |             |         |
|                                                      | <65 years                          | 1     |             |         |
|                                                      | ≥65 years                          | 0.858 | 0.626-1.175 | 0.339   |
| <b>Duration of T2DM (y)[per unit of increment]</b>   |                                    |       |             |         |
|                                                      |                                    | 1.006 | 0.995-1.016 | 0.303   |
| <b>Educational level</b>                             |                                    |       |             |         |
|                                                      | University                         | 1     |             |         |
|                                                      | Secondary                          | 0.980 | 0.644-1.493 | 0.926   |
|                                                      | Primary                            | 1.060 | 0.729-1.543 | 0.759   |
|                                                      | Not completed                      | 1.118 | 0.735-1.699 | 0.602   |
| <b>Country of origin</b>                             |                                    |       |             |         |
|                                                      | Spain                              | 1     |             |         |
|                                                      | Other                              | 1.433 | 0.738-2.784 | 0.288   |
| <b>Employment status</b>                             |                                    |       |             |         |
|                                                      | Not working                        | 1     |             |         |
|                                                      | Working                            | 0.595 | 0.397-0.894 | 0.012   |
| <b>Smoking</b>                                       |                                    |       |             |         |
|                                                      | Never smoker                       | 1     |             |         |
|                                                      | Former smoker                      | 0.854 | 0.652-1.119 | 0.252   |
|                                                      | Current smoker                     | 0.874 | 0.585-1.306 | 0.510   |
| <b>Family history of DM</b>                          |                                    |       |             |         |
|                                                      | No                                 | 1     |             |         |
|                                                      | Yes                                | 1.109 | 0.888-1.385 | 0.362   |
| <b>Current Alcohol use</b>                           |                                    |       |             |         |
|                                                      | No                                 | 1     |             |         |
|                                                      | Yes                                | 0.726 | 0.552-0.954 | 0.022   |
| <b>Physical activity</b>                             |                                    |       |             |         |
|                                                      | Sedentary                          | 1     |             |         |
|                                                      | Low                                | 0.552 | 0.408-0.746 | <0.001  |
|                                                      | Moderate-Vigorous                  | 0.636 | 0.377-1.074 | 0.091   |
| <b>Diabetes treatment</b>                            |                                    |       |             |         |
|                                                      | Oral antidiabetic agents           | 1     |             |         |
|                                                      | Oral antidiabetic agents + insulin | 1.802 | 1.364-2.380 | <0.001  |
|                                                      | Insulin                            | 1.476 | 0.938-2.323 | 0.092   |
|                                                      | Diet                               | 0.932 | 0.623-1.394 | 0.731   |
|                                                      | Unknown                            | 0.771 | 0.560-1.061 | 0.110   |
| <b>BMI (kg/m<sup>2</sup>)[per unit of increment]</b> |                                    |       |             |         |
|                                                      |                                    | 1.012 | 0.992-1.032 | 0.249   |
| <b>Systolic BP (mmHg)[per unit of increment]</b>     |                                    |       |             |         |
|                                                      |                                    | 0.982 | 0.971-0.992 | 0.001   |
| <b>Diastolic BP (mmHg)[per unit of increment]</b>    |                                    |       |             |         |
|                                                      |                                    | 0.992 | 0.974-1.009 | 0.358   |
| <b>Cholesterol (mg/dl) [per unit of increment]</b>   |                                    |       |             |         |
|                                                      |                                    | 1.005 | 1.002-1.009 | 0.002   |
| <b>Neuropathy</b>                                    |                                    |       |             |         |
|                                                      | No                                 | 1     |             |         |
|                                                      | Yes                                | 1.951 | 1.423-2.674 | <0.001  |
| <b>Nephropathy</b>                                   |                                    |       |             |         |
|                                                      | No                                 | 1     |             |         |

|                                                             |                          |       |             |        |
|-------------------------------------------------------------|--------------------------|-------|-------------|--------|
|                                                             | Yes                      | 1.077 | 0.782-1.483 | 0.649  |
| <b>Retinopathy</b>                                          |                          |       |             |        |
|                                                             | No                       | 1     |             |        |
|                                                             | Yes                      | 0.784 | 0.578-1.065 | 0.119  |
| <b>Renal failure</b>                                        |                          |       |             |        |
|                                                             | No                       | 1     |             |        |
|                                                             | Yes                      | 1.220 | 0.892-1.670 | 0.214  |
| <b>Self-reported health status</b>                          |                          |       |             |        |
|                                                             | Excellent-very good-good | 1     |             |        |
|                                                             | Fair-poor                | 1.509 | 1.209-1.882 | <0.001 |
| <b>Family history of depression</b>                         |                          |       |             |        |
|                                                             | No                       | 1     |             |        |
|                                                             | Yes                      | 1.419 | 0.975-2.066 | 0.067  |
| <b>Personal history of depression</b>                       |                          |       |             |        |
|                                                             | No                       | 1     |             |        |
|                                                             | Yes                      | 6.482 | 5.138-8.178 | <0.001 |
| <b>Social support (network size)[per unit of increment]</b> |                          |       |             |        |
|                                                             |                          | 0.978 | 0.962-0.993 | 0.005  |
| <b>Physical health score (SF-12)</b>                        |                          |       |             |        |
|                                                             | Score $\geq$ mean        | 1     |             |        |
|                                                             | Score < mean             | 1.243 | 0.910-1.699 | 0.171  |
| <b>Mental health score (SF-12)</b>                          |                          |       |             |        |
|                                                             | Score $\geq$ mean        | 1     |             |        |
|                                                             | Score < mean             | 1.423 | 1.054-1.921 | 0.021  |
| <b>History of cancer</b>                                    |                          |       |             |        |
|                                                             | No                       | 1     |             |        |
|                                                             | Yes                      | 0.961 | 0.716-1.290 | 0.792  |
| <b>Cardiovascular disease</b>                               |                          |       |             |        |
|                                                             | No                       | 1     |             |        |
|                                                             | Yes                      | 1.156 | 0.901-1.482 | 0.255  |
| <b>Heart failure</b>                                        |                          |       |             |        |
|                                                             | No                       | 1     |             |        |
|                                                             | Yes                      | 1.297 | 0.910-1.849 | 0.150  |
| <b>Lower limb amputation</b>                                |                          |       |             |        |
|                                                             | No                       | 1     |             |        |
|                                                             | Yes                      | 1.765 | 0.798-3.904 | 0.160  |

### 3.3. Incidence of depression and predictive factors

During a median 12 months follow-up, 28 patients, without depression at baseline, developed an incident episode of depression, that is an annual incidence of 1.2% (95%CI, 1.11 to 2.81). There were differences by gender: 0.6% (95%CI, 0.13 to 1.07) in men and 2% (95%CI, 1.11 to 2.81) in women ( $p=0.002$ ). Female gender was the variable most strongly associated with incidence of depression (OR, 2.620; 95%CI, 1.129 to 6.083);  $p=0.025$ ). Other variables inversely associated with incidence of depression were: low physical activity (OR, 0.334; 95%CI, 0.136 to 0.818;  $p=0.018$ ), diastolic blood pressure (per each unit of increment) (OR, 0.937; 95%CI, 0.887 to 0.988;  $p=0.017$ ), and social support (network size) (OR, 0.875; 95% CI, 0.797 to 0.962;  $p=0.006$ ).

Of the 592 patients initially identified as depressed, 394 (66.66%) had no symptoms or signs of depression after 1-year of follow-up, and 198 (33.33%) persisted with symptoms.

## 4. Discussion

The association between diabetes and depression has been well-known for at least three decades (4). The prevalence of depression in people with T2DM varies widely owing to circumstances such as differences in the methods used to assess depression (clinical interviews, questionnaires, self-report scales, and medical records), sample origin (clinical or outpatient screening), ethnic subgroups, gender composition, and age intervals. Two meta-analyses reported an overall prevalence of depression ranging from 17.6% to 27% (4). We analyzed the prevalence of depression in a cohort of patients with T2DM from the city of Madrid based on a clinical interview completed with prescribing and clinical data from CCR. Depression was prevalent in 20.03% ( $n=592$ ; CI 95%, 18.6 to 21.5) of our sample, a finding that is lower than the 27.2% reported in primary-care settings and a hospital endocrinology department in Mallorca (Spain) using the Beck Depression Inventory as the screening tool (12). These findings are worrying, given the adverse impact of depression on the natural history of

1  
2  
3 T2DM, which takes the form of poor metabolic control (27), non-adherence to treatment  
4 (28,29), and increased risk of vascular complications (8) .

5  
6  
7 Poor social support and negative life events (i.e., adverse socioeconomic circumstances, death  
8 of relatives) have been associated with depression in people with T2DM (30). These two  
9 factors are more frequent in women (31) (32), thus explaining the predominance of depression  
10 among females, as reported by the vast majority of studies (33) (34). However, not all the  
11 studies have confirmed this hypothesis (35).

12  
13  
14  
15  
16  
17 After adjusting for gender and other known risk factors, our findings show that the association  
18 with depression was reduced by 2.2% per unit of increment of network size. Similarly, the  
19 association with depression could be reduced by physical activity, as we found in patients with  
20 low physical activity compared with a sedentary lifestyle (OR, 0.552; 95%CI, 0.408 to  
21 0.746;p≤0.001). However, we did not demonstrate a similar benefit in those who undertake  
22 moderate or vigorous physical activity. This phenomenon could be explained by the fact that  
23 very few had a high level of activity.

24  
25  
26  
27  
28  
29  
30  
31  
32 General practitioners should be encouraged to implement strategies designed to reduce the  
33 risk of depression in patients with T2DM, especially in those at high-risk of depression owing to  
34 exposure to chronic psychosocial stressors (29).

35  
36  
37  
38 We found an inverse association between low physical activity and social support and  
39 depression. While this association does not necessarily imply a causal relationship, it might  
40 encourage the implementation of physical activity programs and the creation of support  
41 groups focused on psychological well-being and detection of depressive symptoms. Some of  
42 these suggestions have proven to be effective and feasible in older populations (36).

43  
44  
45  
46  
47  
48  
49 On the other hand, it is necessary to bear in mind that treatment of depression can be a  
50 prerequisite for good diabetes control because people with diabetes might follow their  
51 treatment plan more easily if their mood is improved first (37).



1  
2  
3 Other predictive factors of depression such as a previous depressive episode or family history  
4 of depression are not modifiable factors for reducing the risk of developing depression.  
5  
6 However, health professionals must be alert to the presence of early symptoms of depression  
7  
8 in order to treat this condition promptly. Indeed, routine screening for psychosocial problems  
9  
10 such as depression is supported in well-conducted cohort studies (38). In this sense, screening  
11  
12 for depression with questionnaires is insufficiently specific and needs to be complemented by  
13  
14 a formal clinical assessment to confirm the diagnosis (37).  
15

16  
17 Being in employment was inversely associated with depression (OR, 0.595;  $p= 0.012$ ), as  
18  
19 shown elsewhere (39). This aspect suggests that going to work might have a protective role  
20  
21 against depression owing to the social support received from co-workers.  
22

23  
24 Of the classic complications of diabetes, neuropathy was the only one significantly associated  
25  
26 with depression (OR, 1.951;  $p\leq 0.001$ ). Nephropathy, renal failure, heart failure, CVD, and lower  
27  
28 limb amputation tended to have a positive association with depression. However, other  
29  
30 studies have shown a significant and consistent association between complications of diabetes  
31  
32 and depressive symptoms (8) As it was logical to suppose, subjects with depression had lower  
33  
34 values in the mental health component score obtained from the SF-12, as reported elsewhere  
35  
36 (40).  
37

38  
39 Consistent with other studies (41,42), we found that participants with depression self-rated  
40  
41 their health status significantly lower than those without depression. Given the known  
42  
43 relationship between fair/poor perceived health status and mortality (43), especially in  
44  
45 patients with chronic diseases (44), it would be advisable for patients with poor self-rated  
46  
47 health to be enrolled in a health coaching program similar to that used in the Royal North  
48  
49 Shore Hospital, Sydney, Australia (45). In this program, patients with diabetes who had the  
50  
51 lowest self-reported health status at baseline improved their rating in the first question of the  
52  
53 Short-Form 36 Quality of Life Instrument (SF-1) from 4.4 to 3.7 ( $P\leq 0.001$ ), and improved their  
54  
55  
56  
57  
58  
59  
60

1  
2  
3 knowledge of diabetes. Their distress levels decreased significantly with respect to baseline  
4  
5 values.

6  
7 Medications for lowering blood sugar (insulin plus oral anti-diabetic agents) were significantly  
8  
9 associated with depression (OR, 1.802;  $p \leq 0.001$ ). Prior studies have highlighted the same  
10  
11 phenomenon: the glucose-lowering therapies that include insulin are strongly associated with  
12  
13 depression (46). Two different factors could explain this association: first, the implementation  
14  
15 of insulin therapy requires painful injections and frequent glucose measurements, thus  
16  
17 increasing stress and favoring the onset of a depressive episode in old age (47); second, since  
18  
19 insulin is usually necessary for situations of poor glycemic control, it could be that non-optimal  
20  
21 control of diabetes leads to worsening of mood, greater stress, and less life-satisfaction.  
22

23  
24 As for the incidence of depression after one year of follow-up, the present study reveals a  
25  
26 value of 1.20% which is similar to that reported in the ZARADEMP Spanish Study (48), but  
27  
28 lower than reported in other countries (5, 49-51). A possible explanation for this result could  
29  
30 be that, compared with other European countries, the greater number of hours of sunlight in  
31  
32 Spain protect against depression (50). In a meta-analysis (51) that evaluated 16 studies to  
33  
34 analyze the relationship between diabetes and depression, the cumulative incidence of  
35  
36 depression among people with diabetes ranged from 11.9%, after two years of follow-up, (52)  
37  
38 to 23.5%, after 5.9 years of follow-up (53). The conclusion of the meta-analysis (54) is that  
39  
40 there is evidence to support the hypothesis that diabetes is a “depressogenic” condition. This  
41  
42 affirmation implies a real public health problem that may be resolved only by a specific  
43  
44 prevention strategy.  
45

46  
47 Our findings have some limitations. First, the external validity of these results is limited  
48  
49 because the study population may not be representative of the actual population of patients  
50  
51 with diabetes. Second, the time between both telephone interviews for depression screening  
52  
53 was too short (12 months), making it difficult to compare cumulative incidence rates with most  
54  
55 studies. Third, the prescription of antidepressants takes place in diseases other than  
56  
57  
58  
59  
60

1  
2  
3 depression (i.e., sleeping disorders, migraine, neuropathic pain, obsessive-compulsive  
4 disorders, anxiety/panic disorder), and the use of a combined variable for the diagnosis of  
5 depression includes the prescription of antidepressant medication and could have therefore  
6 overestimated its prevalence. Fourth, in order to compare multivariate models from different  
7 studies, it is possible that we just performed an unnecessary adjustment of variables. But,  
8 fortunately, there was no significant evidence for over-adjustment (changes >20% between  
9 crude and adjusted SE, data not shown).

10  
11 Strengths of this study include: the prospective design, which ensured that measurement of  
12 risk factors preceded the development of depression; and the assessment of information on  
13 potentially confounding variables, which reduces the potential selection and confusion biases.  
14 We also used an assessment of depression based on MINI 5.0, completed with having been  
15 diagnosed with depression, treatment with antidepressant medications or any of these  
16 conditions. Therefore, self-reported diagnosis was avoided.

#### 31 32 4.1. Conclusions

33  
34 Depression is very prevalent among patients with T2DM and it is associated with several key  
35 diabetes-related outcomes. Our results suggest that previous mental status, self-reported  
36 health status, and some diabetes-related complications are associated with differences in the  
37 degree of depression. We also found sex-related differences with respect to the prevalence of  
38 depression. Our study shows that the risk of depression could be reduced by physical activity  
39 and social support. These findings should alert practitioners to the importance of detection of  
40 depression in patients with T2DM, and to the need to reduce the risk of depression with  
41 prevention programs focused on improving the physical activity of the patients and the  
42 creation of support groups. Our findings also suggest that the annual incidence rate of  
43 depression is low and that a high proportion of patients with T2DM who experience  
44 depression achieved full remission after one year of follow-up.

### **Acknowledgements**

The authors thank to all health professionals of Primary Health Care of Madrid who have made its development possible.

### **Contributor Ship Statement**

CBL and MASF designed the study and got funding. JCV, PGC, JCAH, RCM and DBV contributed to select the patients sampling by participating general practitioner, to data collection and combined the data collection strategies in a single database. FJSR, CBL, YRF, PGC and MASF analysed the data. PGC, MASF, and JMDY wrote the initial draft of the paper. RJG, ALA, CBL and ECS were involved in further drafting of the paper. All authors participated in interpreting the data, revising the paper for critically important intellectual content and gave final approval of the submitted version.

### **Data Sharing Statement**

No additional data are available

### **Funding**

This study forms part of research funded by the FIS (Fondo de Investigaciones Sanitarias—Health Research Fund, Instituto de Salud Carlos III) grants no.: PI10/02796, PI12/01806 and PI15/00259 and co-financed by the European Union through the Fondo Europeo de Desarrollo Regional (FEDER, “Una manera de hacer Europa”). Also, this article has been supported by the Foundation for Biomedical Research and Innovation of Primary Care FIIBAP through the call for aid for publications 2017.

(<https://saluda.salud.madrid.org/atencionprimaria/investigacion/Paginas/fiibap.aspx>)

1  
2  
3  
4  
5  
6 The members of the MADIABETES Group are as follows : AM Sobrado-de Vicente-Tutor; Mar  
7  
8 Sanz-Pascual; M Arnalte-Barrera; S Pulido-Fernández; EM Donaire-Jiménez; C Montero-Lizana;  
9  
10 M Domínguez-Paniagua; P Serrano-Simarro; R Echegoyen-de Nicolás; P Gil-Díaz; I Cerrada-  
11  
12 Somolinos; R Martín-Cano; A Cava-Rosado; T Mesonero-Grandes; E Gómez-Navarro; A  
13  
14 Maestro-Martín; A Muñoz-Cildoz; ME Calonge-García; M Martín-Bun; P Carreño-Freire; J  
15  
16 Fernández-García; A Morán-Escudero; J Martínez-Irazusta; E Calvo-García; AM Alayeto-  
17  
18 Sánchez; C Reyes-Madrideojos; MJ Bedoya-Frutos; B López-Sabater; J Innerarity-Martínez; A  
19  
20 Rosillo-González; AI Menéndez-Fernández; F Mata-Benjumea; P Vich-Pérez; C Martín-Madrazo;  
21  
22 MJ Gomara-Martínez; C Bello-González; A Pinilla-Carrasco; M Camarero-Shelly; A Cano-Espin; J  
23  
24 Castro Martin; B de Llama-Arauz; A de Miguel-Ballano; MA García-Alonso; JN García-Pascual;  
25  
26 MI González-García; C López-Rodríguez; M Miguel-Garzón; MC Montero-García; S Muñoz-  
27  
28 Quiros-Aliaga; S Núñez-Palomo; O Olmos-Carrasco; N Pertierra-Galindo; G Reviriego-Jaén; P  
29  
30 Rius-Fortea; G Rodríguez-Castro; JM San Vicente-Rodríguez; ME Serrano-Serrano; MM Zamora-  
31  
32 Gómez; and MP Zazo-Lázaro.  
33  
34  
35

### 36 **Competing interests**

37  
38 The authors declare that there is no duality of interest associated with this manuscript.  
39  
40

### 41 **References**

- 42  
43  
44 1. Worldwide trends in diabetes since 1980: a pooled analysis of 751 population-based studies with  
45 4.4 million participants. *The Lancet*. 2016 Apr;387(10027):1513–30.
- 46  
47 2. Soriguer F, Goday A, Bosch-Comas A, Bordiú E, Calle-Pascual A, Carmena R, et al. Prevalence of  
48 diabetes mellitus and impaired glucose regulation in Spain: the Di@bet.es Study. *Diabetologia*.  
49 2012 Jan;55(1):88–93.
- 50  
51 3. Knol MJ, Twisk JWR, Beekman ATF, Heine RJ, Snoek FJ, Pouwer F. Depression as a risk factor for  
52 the onset of type 2 diabetes mellitus. A meta-analysis. *Diabetologia*. 2006 May;49(5):837–45.
- 53  
54 4. Anderson RJ, Freedland KE, Clouse RE, Lustman PJ. The prevalence of comorbid depression in  
55 adults with diabetes: a meta-analysis. *Diabetes Care*. 2001 Jun;24(6):1069–78.  
56  
57  
58  
59  
60

- 1
  - 2
  - 3
  - 4
  - 5
  - 6
  - 7
  - 8
  - 9
  - 10
  - 11
  - 12
  - 13
  - 14
  - 15
  - 16
  - 17
  - 18
  - 19
  - 20
  - 21
  - 22
  - 23
  - 24
  - 25
  - 26
  - 27
  - 28
  - 29
  - 30
  - 31
  - 32
  - 33
  - 34
  - 35
  - 36
  - 37
  - 38
  - 39
  - 40
  - 41
  - 42
  - 43
  - 44
  - 45
  - 46
  - 47
  - 48
  - 49
  - 50
  - 51
  - 52
  - 53
  - 54
  - 55
  - 56
  - 57
  - 58
  - 59
  - 60
5. Golden SH, Lazo M, Carnethon M, Bertoni AG, Schreiner PJ, Diez Roux AV, et al. Examining a bidirectional association between depressive symptoms and diabetes. *JAMA*. 2008 Jun 18;299(23):2751–9.
  6. Lunghi C, Moisan J, Grégoire J-P, Guénette L. Incidence of Depression and Associated Factors in Patients With Type 2 Diabetes in Quebec, Canada: A Population-Based Cohort Study. *Medicine (Baltimore)*. 2016 May;95(21):e3514.
  7. van Dooren FEP, Nefs G, Schram MT, Verhey FRJ, Denollet J, Pouwer F. Depression and risk of mortality in people with diabetes mellitus: a systematic review and meta-analysis. *PloS One*. 2013;8(3):e57058.
  8. de Groot M, Anderson R, Freedland KE, Clouse RE, Lustman PJ. Association of depression and diabetes complications: a meta-analysis. *Psychosom Med*. 2001 Aug;63(4):619–30.
  9. Lustman PJ, Clouse RE. Depression in diabetic patients: the relationship between mood and glycemic control. *J Diabetes Complications*. 2005 Apr;19(2):113–22.
  10. Schram MT, Baan CA, Pouwer F. Depression and quality of life in patients with diabetes: a systematic review from the European depression in diabetes (EDID) research consortium. *Curr Diabetes Rev*. 2009 May;5(2):112–9.
  11. Jimenez-Garcia R, Martinez Huedo MA, Hernandez-Barrera V, Lopez de Andres A, Martinez D, Jimenez-Trujillo I, et al. Psychological distress and mental disorders among Spanish diabetic adults: a case-control study. *Prim Care Diabetes*. 2012 Jul;6(2):149–56.
  12. Nicolau J, Simó R, Sanchís P, Ayala L, Fortuny R, Rivera R, et al. Prevalence and Clinical Correlators of Undiagnosed Significant Depressive Symptoms Among Individuals with Type 2 Diabetes In A Mediterranean Population. *Exp Clin Endocrinol Diabetes Off J Ger Soc Endocrinol Ger Diabetes Assoc*. 2016 Nov;124(10):630–6.
  13. Lopez-de-Andrés A, Jiménez-Trujillo MI, Hernández-Barrera V, de Miguel-Yanes JM, Méndez-Bailón M, Perez-Farinos N, et al. Trends in the prevalence of depression in hospitalized patients with type 2 diabetes in Spain: analysis of hospital discharge data from 2001 to 2011. *PloS One*. 2015;10(2):e0117346.
  14. Alonso-Morán E, Satylganova A, Orueta JF, Nuño-Solinis R. Prevalence of depression in adults with type 2 diabetes in the Basque Country: relationship with glycaemic control and health care costs. *BMC Public Health*. 2014 Jul 30;14:769.
  15. Esteban y Peña MM, Hernandez Barrera V, Fernández Cordero X, Gil de Miguel A, Rodríguez Pérez M, Lopez-de Andres A, et al. Self-perception of health status, mental health and quality of life among adults with diabetes residing in a metropolitan area. *Diabetes Metab*. 2010 Sep;36(4):305–11.
  16. Hervás A, Zabaleta A, De Miguel G, Beldarráin O, Díez J. [Health related quality of life in patients with diabetes mellitus type 2]. *An Sist Sanit Navar*. 2007 Apr;30(1):45–52.
  17. Salinero-Fort MÁ, San Andrés-Rebollo FJ, de Burgos-Lunar C, Arrieta-Blanco FJ, Gómez-Campelo P, MADIABETES Group. Four-year incidence of diabetic retinopathy in a Spanish cohort: the MADIABETES study. *PloS One*. 2013;8(10):e76417.
  18. de Burgos-Lunar C, Gómez-Campelo P, Cárdenas-Valladolid J, Fuentes-Rodríguez CY, Granados-Menéndez MI, López-López F, et al. Effect of depression on mortality and cardiovascular morbidity in type 2 diabetes mellitus after 3 years follow up. The DIADEMA study protocol. *BMC Psychiatry*. 2012 Jul 30;12:95.

19. World Organization of National Colleges, Academies, and Academic Associations of General Practitioners/Family Physicians, editor. ICPC-2-R: international classification of primary care. Rev. 2nd ed. Oxford ; New York: Oxford University Press; 2005. 193 p. (Oxford medical publications).
20. World Health Organization, editor. International statistical classification of diseases and related health problems. 10th revision, 2nd edition. Geneva: World Health Organization; 2004. 3 p.
21. Pan A, Lucas M, Sun Q, van Dam RM, Franco OH, Willett WC, et al. Increased Mortality Risk in Women With Depression and Diabetes Mellitus. *Arch Gen Psychiatry*. 2011 Jan 3;68(1):42.
22. Sheehan DV, Lecrubier Y, Sheehan KH, Amorim P, Janavs J, Weiller E, et al. The Mini-International Neuropsychiatric Interview (M.I.N.I.): the development and validation of a structured diagnostic psychiatric interview for DSM-IV and ICD-10. *J Clin Psychiatry*. 1998;59 Suppl 20:22-33;quiz 34-57.
23. Ferrando L, Bobes J, Gibert J, Soto M, Soto O. Mini International Neuropsychiatric Interview. Versión en español 5.0.0. 2000: Madrid.
24. Sherbourne CD, Stewart AL. The MOS social support survey. *Soc Sci Med* 1982. 1991;32(6):705–14.
25. Ware JE, Kosinski M, Keller SD. How to score the SF-12 physical and mental health summaries: a user's manual. Boston: New England Medical Centre; 1995.
26. Gómez-Benito J, Ruiz C, Guilera G. A Spanish version of the Athens Insomnia Scale. *Qual Life Res Int J Qual Life Asp Treat Care Rehabil*. 2011 Aug;20(6):931–7.
27. Egede LE, Ellis C. Diabetes and depression: global perspectives. *Diabetes Res Clin Pract*. 2010 Mar;87(3):302–12.
28. Lin EHB, Katon W, Rutter C, Simon GE, Ludman EJ, Von Korff M, et al. Effects of enhanced depression treatment on diabetes self-care. *Ann Fam Med*. 2006 Feb;4(1):46–53.
29. Lin EHB, Rutter CM, Katon W, Heckbert SR, Ciechanowski P, Oliver MM, et al. Depression and advanced complications of diabetes: a prospective cohort study. *Diabetes Care*. 2010 Feb;33(2):264–9.
30. Habtewold TD, Alemu SM, Haile YG. Sociodemographic, clinical, and psychosocial factors associated with depression among type 2 diabetic outpatients in Black Lion General Specialized Hospital, Addis Ababa, Ethiopia: a cross-sectional study. *BMC Psychiatry [Internet]*. 2016 Dec [cited 2017 Aug 25];16(1). Available from: <http://bmcp psychiatry.biomedcentral.com/articles/10.1186/s12888-016-0809-6>
31. Kraaij V, Arensman E, Spinhoven P. Negative Life Events and Depression in Elderly Persons: A Meta-Analysis. *J Gerontol B Psychol Sci Soc Sci*. 2002 Jan 1;57(1):P87–94.
32. Krag MØ, Hasselbalch L, Siersma V, Nielsen ABS, Reventlow S, Malterud K, et al. The impact of gender on the long-term morbidity and mortality of patients with type 2 diabetes receiving structured personal care: a 13 year follow-up study. *Diabetologia*. 2016 Feb;59(2):275–85.
33. Cols-Sagarra C, López-Simarro F, Alonso-Fernández M, Mancera-Romero J, Pérez-Unanua MP, Mediavilla-Bravo JJ, et al. Prevalence of depression in patients with type 2 diabetes attended in primary care in Spain. *Prim Care Diabetes*. 2016 Oct;10(5):369–75.
34. Naranjo DM, Fisher L, Areán PA, Hessler D, Mullan J. Patients with type 2 diabetes at risk for major depressive disorder over time. *Ann Fam Med*. 2011 Apr;9(2):115–20.

- 1
  - 2
  - 3
  - 4
  - 5
  - 6
  - 7
  - 8
  - 9
  - 10
  - 11
  - 12
  - 13
  - 14
  - 15
  - 16
  - 17
  - 18
  - 19
  - 20
  - 21
  - 22
  - 23
  - 24
  - 25
  - 26
  - 27
  - 28
  - 29
  - 30
  - 31
  - 32
  - 33
  - 34
  - 35
  - 36
  - 37
  - 38
  - 39
  - 40
  - 41
  - 42
  - 43
  - 44
  - 45
  - 46
  - 47
  - 48
  - 49
  - 50
  - 51
  - 52
  - 53
  - 54
  - 55
  - 56
  - 57
  - 58
  - 59
  - 60
35. Dalgard OS, Dowrick C, Lehtinen V, Vazquez-Barquero JL, Casey P, Wilkinson G, et al. Negative life events, social support and gender difference in depression: a multinational community survey with data from the ODIN study. *Soc Psychiatry Psychiatr Epidemiol*. 2006 Jun;41(6):444–51.
36. Cole MG. Brief interventions to prevent depression in older subjects: a systematic review of feasibility and effectiveness. *Am J Geriatr Psychiatry Off J Am Assoc Geriatr Psychiatry*. 2008 Jun;16(6):435–43.
37. Petrak F, Baumeister H, Skinner TC, Brown A, Holt RIG. Depression and diabetes: treatment and health-care delivery. *Lancet Diabetes Endocrinol*. 2015 Jun;3(6):472–85.
38. Standards of Medical Care in Diabetes—2016 Abridged for Primary Care Providers. *Clin Diabetes*. 2016 Jan;34(1):3–21.
39. Mocan AS, Iancu SS, Duma L, Mureseanu C, Baban AS. Depression in romanian patients with type 2 diabetes: prevalence and risk factors. *Clujul Med* 1957. 2016;89(3):371–7.
40. Yoshida S, Hirai M, Suzuki S, Awata S, Oka Y. Neuropathy is associated with depression independently of health-related quality of life in Japanese patients with diabetes. *Psychiatry Clin Neurosci*. 2009 Feb;63(1):65–72.
41. Sundaram M, Kavookjian J, Patrick JH, Miller L-A, Madhavan SS, Scott VG. Quality of life, health status and clinical outcomes in Type 2 diabetes patients. *Qual Life Res Int J Qual Life Asp Treat Care Rehabil*. 2007 Mar;16(2):165–77.
42. McCollum M, Ellis SL, Regensteiner JG, Zhang W, Sullivan PW. Minor depression and health status among US adults with diabetes mellitus. *Am J Manag Care*. 2007 Feb;13(2):65–72.
43. Mossey JM, Shapiro E. Self-rated health: a predictor of mortality among the elderly. *Am J Public Health*. 1982 Aug;72(8):800–8.
44. Idler EL, Benyamini Y. Self-rated health and mortality: a review of twenty-seven community studies. *J Health Soc Behav*. 1997 Mar;38(1):21–37.
45. Delaney G, Newlyn N, Pamplona E, Hocking SL, Glastras SJ, McGrath RT, et al. Identification of Patients With Diabetes Who Benefit Most From a Health Coaching Program in Chronic Disease Management, Sydney, Australia, 2013. *Prev Chronic Dis*. 2017 Mar 2;14:E21.
46. Otieno CF, Kanu JE, Karari EM, Okech-Helu V, Joshi MD, Mutai K. Glucose-lowering therapies, adequacy of metabolic control, and their relationship with comorbid depression in outpatients with type 2 diabetes in a tertiary hospital in Kenya. *Diabetes Metab Syndr Obes Targets Ther*. 2017;10:141–9.
47. Brilman EI, Ormel J. Life events, difficulties and onset of depressive episodes in later life. *Psychol Med*. 2001 Jul;31(5):859–69.
48. de Jonge P, Roy JF, Saz P, Marcos G, Lobo A, ZARADEMP Investigators. Prevalent and incident depression in community-dwelling elderly persons with diabetes mellitus: results from the ZARADEMP project. *Diabetologia*. 2006 Nov;49(11):2627–33.
49. Knol MJ, Heerdink ER, Egberts ACG, Geerlings MI, Gorter KJ, Numans ME, et al. Depressive symptoms in subjects with diagnosed and undiagnosed type 2 diabetes. *Psychosom Med*. 2007 May;69(4):300–5.



- 1  
2  
3 50. Nouwen A, Winkley K, Twisk J, Lloyd CE, Peyrot M, Ismail K, et al. Type 2 diabetes mellitus as a risk  
4 factor for the onset of depression: a systematic review and meta-analysis. *Diabetologia*. 2010  
5 Dec;53(12):2480–6.
- 6  
7 51. Lambert GW, Reid C, Kaye DM, Jennings GL, Esler MD. Effect of sunlight and season on serotonin  
8 turnover in the brain. *Lancet*. 2002;360(9348):1840-2
- 9  
10 52. Hasan SS, Mamun AA, Clavarino AM, Kairuz T. Incidence and risk of depression associated with  
11 diabetes in adults: evidence from longitudinal studies. *Community Ment Health J*. 2015  
12 Feb;51(2):204–10.
- 13  
14 53. Kim J-M, Stewart R, Kim S-W, Yang S-J, Shin I-S, Yoon J-S. Vascular risk factors and incident late-life  
15 depression in a Korean population. *Br J Psychiatry J Ment Sci*. 2006 Jul;189:26–30.
- 16  
17 54. Maraldi C, Volpato S, Penninx BW, Yaffe K, Simonsick EM, Strotmeyer ES, et al. Diabetes mellitus,  
18 glycemic control, and incident depressive symptoms among 70- to 79-year-old persons: the  
19 health, aging, and body composition study. *Arch Intern Med*. 2007 Jun 11;167(11):1137–44.
- 20  
21  
22  
23  
24  
25  
26  
27  
28  
29  
30  
31  
32  
33  
34  
35  
36  
37  
38  
39  
40  
41  
42  
43  
44  
45  
46  
47  
48  
49  
50  
51  
52  
53  
54  
55  
56  
57  
58  
59  
60

1  
2  
3  
4  
5  
6  
7  
8  
9  
10  
11  
12  
13  
14  
15  
16  
17  
18  
19  
20  
21  
22  
23  
24  
25  
26  
27  
28  
29  
30  
31  
32  
33  
34  
35  
36  
37  
38  
39  
40  
41  
42  
43  
44  
45  
46  
47  
48  
49  
50  
51  
52  
53  
54  
55  
56  
57  
58  
59  
60

**Figure 1- Flowchart**

For peer review only

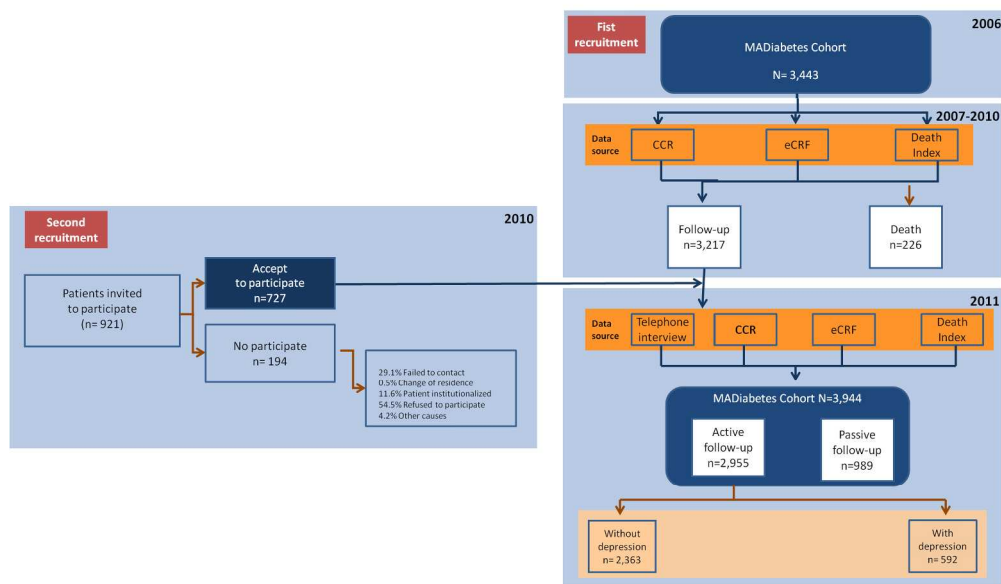

387x242mm (300 x 300 DPI)

Review only

## STROBE Statement—checklist of items that should be included in reports of observational studies

|                           | Item No          | Recommendation                                                                                                                                                                                                                                                                                                                                                                                                                                                                                                                                                                                                                                                                                   |
|---------------------------|------------------|--------------------------------------------------------------------------------------------------------------------------------------------------------------------------------------------------------------------------------------------------------------------------------------------------------------------------------------------------------------------------------------------------------------------------------------------------------------------------------------------------------------------------------------------------------------------------------------------------------------------------------------------------------------------------------------------------|
| <b>Title and abstract</b> | 1<br>Pag. 1,3    | (a) Indicate the study's design with a commonly used term in the title or the abstract<br>(b) Provide in the abstract an informative and balanced summary of what was done and what was found                                                                                                                                                                                                                                                                                                                                                                                                                                                                                                    |
| <b>Introduction</b>       |                  |                                                                                                                                                                                                                                                                                                                                                                                                                                                                                                                                                                                                                                                                                                  |
| Background/rationale      | 2<br>Pag. 5      | Explain the scientific background and rationale for the investigation being reported                                                                                                                                                                                                                                                                                                                                                                                                                                                                                                                                                                                                             |
| Objectives                | 3<br>Pag. 5      | State specific objectives, including any prespecified hypotheses                                                                                                                                                                                                                                                                                                                                                                                                                                                                                                                                                                                                                                 |
| <b>Methods</b>            |                  |                                                                                                                                                                                                                                                                                                                                                                                                                                                                                                                                                                                                                                                                                                  |
| Study design              | 4<br>Pag. 6      | Present key elements of study design early in the paper                                                                                                                                                                                                                                                                                                                                                                                                                                                                                                                                                                                                                                          |
| Setting                   | 5<br>Pag. 6      | Describe the setting, locations, and relevant dates, including periods of recruitment, exposure, follow-up, and data collection                                                                                                                                                                                                                                                                                                                                                                                                                                                                                                                                                                  |
| Participants              | 6<br>Pag. 6      | (a) <i>Cohort study</i> —Give the eligibility criteria, and the sources and methods of selection of participants. Describe methods of follow-up<br><i>Case-control study</i> —Give the eligibility criteria, and the sources and methods of case ascertainment and control selection. Give the rationale for the choice of cases and controls<br><i>Cross-sectional study</i> —Give the eligibility criteria, and the sources and methods of selection of participants<br>(b) <i>Cohort study</i> —For matched studies, give matching criteria and number of exposed and unexposed<br><i>Case-control study</i> —For matched studies, give matching criteria and the number of controls per case |
| Variables                 | 7<br>Pag. 8-11   | Clearly define all outcomes, exposures, predictors, potential confounders, and effect modifiers. Give diagnostic criteria, if applicable                                                                                                                                                                                                                                                                                                                                                                                                                                                                                                                                                         |
| Data sources/measurement  | 8*<br>Pag. 7-8   | For each variable of interest, give sources of data and details of methods of assessment (measurement). Describe comparability of assessment methods if there is more than one group                                                                                                                                                                                                                                                                                                                                                                                                                                                                                                             |
| Bias                      | 9<br>Pag. 11-12  | Describe any efforts to address potential sources of bias                                                                                                                                                                                                                                                                                                                                                                                                                                                                                                                                                                                                                                        |
| Study size                | 10<br>Pag. 6     | Explain how the study size was arrived at                                                                                                                                                                                                                                                                                                                                                                                                                                                                                                                                                                                                                                                        |
| Quantitative variables    | 11<br>Pag. 8-10  | Explain how quantitative variables were handled in the analyses. If applicable, describe which groupings were chosen and why                                                                                                                                                                                                                                                                                                                                                                                                                                                                                                                                                                     |
| Statistical methods       | 12<br>Pag. 11-12 | (a) Describe all statistical methods, including those used to control for confounding<br>(b) Describe any methods used to examine subgroups and interactions<br>(c) Explain how missing data were addressed<br>(d) <i>Cohort study</i> —If applicable, explain how loss to follow-up was addressed<br><i>Case-control study</i> —If applicable, explain how matching of cases and controls was addressed<br><i>Cross-sectional study</i> —If applicable, describe analytical methods taking account of sampling strategy<br>(e) Describe any sensitivity analyses                                                                                                                                |

Continued on next page

| <b>Results</b>           |                   |                                                                                                                                                                                                                                                                                                                                                                                                               |
|--------------------------|-------------------|---------------------------------------------------------------------------------------------------------------------------------------------------------------------------------------------------------------------------------------------------------------------------------------------------------------------------------------------------------------------------------------------------------------|
| Participants             | 13*<br>Pag. 13-18 | (a) Report numbers of individuals at each stage of study—eg numbers potentially eligible, examined for eligibility, confirmed eligible, included in the study, completing follow-up, and analysed<br>(b) Give reasons for non-participation at each stage<br>(c) Consider use of a flow diagram                                                                                                               |
| Descriptive data         | 14*<br>Pag. 13-14 | (a) Give characteristics of study participants (eg demographic, clinical, social) and information on exposures and potential confounders<br>(b) Indicate number of participants with missing data for each variable of interest<br>(c) <i>Cohort study</i> —Summarise follow-up time (eg, average and total amount)                                                                                           |
| Outcome data             | 15*<br>Pag. 15-18 | <i>Cohort study</i> —Report numbers of outcome events or summary measures over time<br><i>Case-control study</i> —Report numbers in each exposure category, or summary measures of exposure<br><i>Cross-sectional study</i> —Report numbers of outcome events or summary measures                                                                                                                             |
| Main results             | 16<br>Pag. 15-18  | (a) Give unadjusted estimates and, if applicable, confounder-adjusted estimates and their precision (eg, 95% confidence interval). Make clear which confounders were adjusted for and why they were included<br>(b) Report category boundaries when continuous variables were categorized<br>(c) If relevant, consider translating estimates of relative risk into absolute risk for a meaningful time period |
| Other analyses           | 17                | Report other analyses done—eg analyses of subgroups and interactions, and sensitivity analyses                                                                                                                                                                                                                                                                                                                |
| <b>Discussion</b>        |                   |                                                                                                                                                                                                                                                                                                                                                                                                               |
| Key results              | 18<br>Pag. 18-22  | Summarise key results with reference to study objectives                                                                                                                                                                                                                                                                                                                                                      |
| Limitations              | 19<br>Pag. 21-22  | Discuss limitations of the study, taking into account sources of potential bias or imprecision. Discuss both direction and magnitude of any potential bias                                                                                                                                                                                                                                                    |
| Interpretation           | 20<br>Pag. 20-21  | Give a cautious overall interpretation of results considering objectives, limitations, multiplicity of analyses, results from similar studies, and other relevant evidence                                                                                                                                                                                                                                    |
| Generalisability         | 21<br>Pag. 20-21  | Discuss the generalisability (external validity) of the study results                                                                                                                                                                                                                                                                                                                                         |
| <b>Other information</b> |                   |                                                                                                                                                                                                                                                                                                                                                                                                               |
| Funding                  | 22<br>Pag. 22-23  | Give the source of funding and the role of the funders for the present study and, if applicable, for the original study on which the present article is based                                                                                                                                                                                                                                                 |

\*Give information separately for cases and controls in case-control studies and, if applicable, for exposed and unexposed groups in cohort and cross-sectional studies.

**Note:** An Explanation and Elaboration article discusses each checklist item and gives methodological background and published examples of transparent reporting. The STROBE checklist is best used in conjunction with this article (freely available on the Web sites of PLoS Medicine at <http://www.plosmedicine.org/>, Annals of Internal Medicine at <http://www.annals.org/>, and Epidemiology at <http://www.epidem.com/>). Information on the STROBE Initiative is available at [www.strobe-statement.org](http://www.strobe-statement.org).
